# Supplementary material for: Transcriptome analysis reveals novel players in the cranial neural crest gene regulatory network
Source: HighWire-hosted journal article supplement (doi:10.1101/gr.161182.113), 2014-01-03
Supplement: Supplemental_Legends.docx [file Supplemental_Legends.docx]

**Supplementary Legends**

**Supplementary Movie 1.** Time lapse imaging of neural crest migration with *Sox10E2* enhancer.

**Supplementary Figure 1. Additional loss of function studies.** (A-D) COL9A3 and LTK morpholinated embryos. (E-F) Knockdown of neural crest and neural plate border specifiers causes upregulation of *EBF1*. Since *ETS1* and *MYB* are thought to act as activators such effects are most likely to be indirect.

**Supplementary Table 1. Cranial Neural Crest Transcriptome Dataset.** Enriched genes in migratory cranial neural crest cells.

**Supplementary Table 2. Genes depleted in the cranial neural crest in relation to whole embryo.**

**Supplementary Table 3. Cranial neural crest transcriptome dataset genes validated by *in situ* hybridization.**

**Supplementary Table 4. Transcriptional regulators identified of the migrating cranial neural crest dataset.** 50 most-enriched transcriptional regulators unveiled by transcriptome analysis of the migrating CNC.

**Supplementary Table 5. Transcript levels of replicate libraries.** Contains the transcript levels of the 200 most-enriched transcripts in each of the replicate libraries.
