# Supplementary material for: Transcriptome analysis reveals novel players in the cranial neural crest gene regulatory network
Source: HighWire-hosted journal article supplement (doi:10.1101/gr.161182.113), 2014-01-03
Supplement: Supplemental_Table1.xlsx [file Supplemental_Table1.xlsx]

## Sheet: Sheet1
GeneName	EnsemblGeneId	GFP-	10e2 GFP+	log2(fold_change)	p_value	q_value
AASDH: aminoadipate-semialdehyde dehydrogenase	ENSGALG00000013764	6.63341	14.5314	1.13135	0.00167599	0.0259212
ABCB7: ABC transporter, integral membrane type 1	ENSGALG00000007788	11.2928	32.6286	1.53073	0.004123	0.0473983
ABCB9: ATP-binding cassette, sub-family B (MDR/TAP), member 9	ENSGALG00000003736	1.42214	6.14483	2.11132	0.000145953	0.00386619
ABCF2: ATP-binding cassette, sub-family F (GCN20), member 2	ENSGALG00000013354	42.8012	87.9647	1.03927	8.71509e-05	0.00250387
ABTB1: ankyrin repeat and BTB (POZ) domain containing 1	ENSGALG00000005999	2.66371	6.53133	1.29394	8.68984e-06	0.000370064
ACADSB: hort/branched chain specific acyl-CoA dehydrogenase, mitochondrial	ENSGALG00000009656	5.05202	17.8829	1.82365	0	0
ACAN: aggrecan	ENSGALG00000006725	1.03174	6.51625	2.65897	3.41042e-05	0.00120225
Acat2/Acat3: acetyl-Coenzyme A acetyltransferase 2	ENSGALG00000011659	15.8947	48.8909	1.62102	0.00306254	0.0391059
ACBD7: acyl-CoA binding domain containing 7	ENSGALG00000019663	0.636104	5.02769	2.98256	0.00429234	0.0486047
ACCN2: Amiloride-sensitive cation channel 2, neuronal	ENSGALG00000006240	1.83275	7.96852	2.1203	8.21316e-05	0.00240189
ACSL1: acyl-CoA synthetase long-chain family member 1	ENSGALG00000010628	11.6399	44.1529	1.92343	0.000428549	0.00911673
ACSL6: acyl-CoA synthetase long-chain family member 6	ENSGALG00000006644	9.5884	64.6712	2.75376	0	0
ACT5: Actin, cytoplasmic type 5	ENSGALG00000001381	105.812	335.092	1.66305	5.51896e-06	0.000249605
ADAM10: ADAM metallopeptidase domain 10	ENSGALG00000004212	3.10054	12.2806	1.98579	0.00226288	0.031986
ADAM33: ADAM metallopeptidase domain 33	ENSGALG00000016038	5.52529	18.1801	1.71824	0.000397086	0.0086444
ADAMTS1: ADAM metallopeptidase with thrombospondin type 1 motif, 1	ENSGALG00000015792	8.25553	49.7337	2.59079	2.79454e-11	4.83083e-09
ADAMTS15: ADAM metallopeptidase with thrombospondin type 1 motif, 15	ENSGALG00000001407	2.23718	6.83693	1.61166	0.000905788	0.0161856
ADAT1: adenosine deaminase, tRNA-specific 1	ENSGALG00000000908	36.901	95.9006	1.37788	0.00142606	0.0228132
ADCY8: adenylate cyclase 8 (brain)	ENSGALG00000016298	2.11502	17.1489	3.01937	1.53563e-06	8.14475e-05
ADSS: adenylosuccinate synthase	ENSGALG00000010702	27.8692	81.0098	1.53942	0.000862602	0.0155328
ADSSL1: adenylosuccinate synthase like 1	ENSGALG00000011618	4.45046	10.341	1.21635	0.00309473	0.0392937
ADSV: Adseverin	ENSGALG00000010770	1.07128	5.49722	2.35936	0.0020534	0.0299875
AFG3L2: AFG3 ATPase family member 3-like 2 (S. cerevisiae)	ENSGALG00000013853	17.1971	43.1586	1.32748	3.96369e-05	0.00134638
AHCTF1: AT hook containing transcription factor 1	ENSGALG00000010630	30.562	62.9622	1.04274	5.4546e-09	5.63247e-07
AHCY: adenosylhomocysteinase	ENSGALG00000002030	23.2716	64.7739	1.47684	0.00403992	0.0469287
AHCYL1: adenosylhomocysteinase-like 1	ENSGALG00000000329	9.03272	18.4207	1.02809	9.25757e-11	1.3849e-08
AIDA: axin interactor, dorsalization associated	ENSGALG00000009426	16.5469	46.3453	1.48586	0.00376836	0.0447543
AIFM1: apoptosis-inducing factor, mitochondrion-associated, 1	ENSGALG00000004003	29.1631	89.825	1.62297	0.000183052	0.00461824
AK2: adenylate kinase 2	ENSGALG00000003597	32.4293	90.284	1.47717	0.00363066	0.0434283
AKAP1: A kinase (PRKA) anchor protein 1	ENSGALG00000005575	38.0654	82.512	1.11612	2.70619e-05	0.000997699
ALDH18A1: aldehyde dehydrogenase 18 family, member A1	ENSGALG00000010522	38.4186	96.5426	1.32936	0.00113998	0.0195042
ALDH7A1	ENSGALG00000008229	25.2386	74.0345	1.55257	0.00425537	0.0484191
ALDH9A1: aldehyde dehydrogenase 9 family, member A1	ENSGALG00000003495	2.98452	9.39538	1.65445	2.68941e-05	0.000997699
ALG6: asparagine-linked glycosylation 6	ENSGALG00000010991	14.4595	32.6278	1.17408	5.44886e-08	4.33994e-06
ALMS1: Alstrom syndrome 1	ENSGALG00000016039	36.7578	87.0766	1.24424	0.000311979	0.00711696
ALX1: ALX homeobox 1	ENSGALG00000011144	1.59899	19.0398	3.57378	5.85603e-06	0.000263318
AMACR: alpha-methylacyl-CoA racemase	ENSGALG00000003326	2.81292	9.60517	1.77174	0.00272143	0.0361674
AMD1: adenosylmethionine decarboxylase 1	ENSGALG00000015049	9.4763	39.2363	2.04979	0.000211159	0.00518718
AMIGO2: adhesion molecule with Ig-like domain 2	ENSGALG00000009739	2.12908	18.313	3.10456	2.89802e-05	0.00105839
AMMECR1L: AMME chromosomal region gene 1-like	ENSGALG00000002061	15.0636	35.2071	1.2248	0.00379916	0.0450263
ANAPC7: anaphase promoting complex subunit 7	ENSGALG00000003826	9.53454	28.2335	1.56617	0.00402553	0.046805
ANKH: ankylosis, progressive homolog (mouse)	ENSGALG00000012964	4.41086	30.0079	2.76621	2.18936e-13	5.80603e-11
ANKIB1: ankyrin repeat and IBR domain containing 1	ENSGALG00000009394	11.8754	30.092	1.34141	0.000197543	0.00492116
ANKRD27: ankyrin repeat domain 27 (VPS9 domain)	ENSGALG00000004671	5.03064	12.9893	1.36851	2.56087e-05	0.000960784
ANKRD31: ankyrin repeat domain 31	ENSGALG00000014945	26.6173	73.0762	1.45703	8.54801e-05	0.00246835
ANKRD46: ankyrin repeat domain 46	ENSGALG00000013904	12.9049	41.0884	1.67082	6.93375e-05	0.0021042
Ankrd50: ankyrin repeat domain 50	ENSGALG00000011831	14.2919	55.7794	1.96453	0.000248119	0.00592061
ANP32E: acidic (leucine-rich) nuclear phosphoprotein 32 family, member E	ENSGALG00000013464	3.89165	12.4386	1.67637	0.00338771	0.0413561
anti-Mullerian hormone	ENSGALG00000000827	14.0703	55.1835	1.97158	0.00284371	0.0371785
ANXA11: annexin A11	ENSGALG00000002664	1.85363	9.09319	2.29444	1.93947e-07	1.35109e-05
AP1M1: adaptor-related protein complex 1, mu 1 subunit	ENSGALG00000003959	18.4767	57.9617	1.64939	0.00202357	0.0297312
AP1S2: adaptor-related protein complex 1, sigma 2 subunit	ENSGALG00000016551	11.0376	40.8843	1.88912	0.00339181	0.041369
AP3B1: adaptor-related protein complex 3, beta 1 subunit	ENSGALG00000004390	19.1496	43.0112	1.16739	1.52742e-05	0.000609706
AP3M2: adaptor-related protein complex 3, mu 2 subunit	ENSGALG00000003659	9.47436	32.0965	1.76032	0.00205946	0.0300573
AP3S1: adaptor-related protein complex 3, sigma 1 subunit	ENSGALG00000002341	18.4606	61.8785	1.74499	5.38116e-05	0.00171558
AP3S1: adaptor-related protein complex 3, sigma 1 subunit	ENSGALG00000023716	3.99599	13.3946	1.74503	0.003618	0.0432991
AP4E1: adaptor-related protein complex 4, epsilon 1 subunit	ENSGALG00000004776	11.5498	24.057	1.05859	8.15287e-05	0.00238725
API5: apoptosis inhibitor 5	ENSGALG00000023382	17.0398	53.6767	1.65539	0.00231973	0.032574
APPL1: adaptor protein, phosphotyrosine interaction, PH domain and leucine zipper containing 1	ENSGALG00000005527	16.2341	43.1934	1.41178	3.2591e-05	0.00116296
AQR: aquarius homolog (mouse)	ENSGALG00000009838	26.1041	76.4419	1.55009	5.03571e-05	0.0016322
ARFGAP1: ADP-ribosylation factor GTPase activating protein 1	ENSGALG00000005781	8.01757	23.4618	1.54908	5.43259e-10	6.853e-08
ARFGEF2: ADP-ribosylation factor guanine nucleotide-exchange factor 2 (brefeldin A-inhibited)	ENSGALG00000004663	7.68144	25.3045	1.71994	9.73685e-05	0.00275763
ARFIP1: ADP-ribosylation factor interacting protein 1	ENSGALG00000010105	21.3446	52.071	1.28661	1.49816e-06	8.0006e-05
ARGL1: Arginine and glutamate-rich protein 1	ENSGALG00000016855	24.2696	65.3313	1.42862	0.000207481	0.00512083
ARHGAP11A: Rho GTPase activating protein 11A	ENSGALG00000009731	11.6742	41.7679	1.83907	5.67105e-06	0.000255987
ARHGAP31: Rho GTPase activating protein 31	ENSGALG00000015077	59.8934	201.935	1.75343	2.07679e-08	1.84281e-06
ARHGEF18: Rho/Rac guanine nucleotide exchange factor (GEF) 18	ENSGALG00000003572	9.28882	21.1294	1.18569	0.000244907	0.00586194
ARID1A:AT rich interactive domain 1A	ENSGALG00000000319	42.3935	90.9674	1.1015	0.000131084	0.00353653
ARID3B: AT rich interactive domain 3B (BRIGHT-like)	ENSGALG00000001376	7.92272	24.8283	1.64792	0.00134329	0.021903
ARL5A: ADP-ribosylation factor-like 5A	ENSGALG00000012509	11.0687	39.782	1.84562	0.000663492	0.012765
ARMC1:Armadillo repeat-containing protein 1	ENSGALG00000000062	7.33896	26.2595	1.83919	0	0
ARMC4: armadillo repeat containing 4	ENSGALG00000007417	2.46825	20.7876	3.07417	7.52247e-05	0.00224491
ARNTL2: aryl hydrocarbon receptor nuclear translocator-like 2	ENSGALG00000014096	4.38958	10.5478	1.26478	0.00110058	0.0190395
ARPC5: actin related protein 2/3 complex, subunit 5, 16kDa	ENSGALG00000020927	22.8349	86.5142	1.9217	1.79295e-06	9.2693e-05
ARSH: arylsulfatase H	ENSGALG00000016636	1.79818	5.35814	1.57519	0.00360456	0.0432047
ARSK: arylsulfatase family, member K	ENSGALG00000014672	2.82719	8.07782	1.5146	2.68236e-06	0.000132064
ASF1A: ASF1 anti-silencing function 1 homolog A (S. cerevisiae)	ENSGALG00000014887	117.13	408.426	1.80197	1.25465e-08	1.17119e-06
ASNS: asparagine synthetase (glutamine-hydrolyzing)	ENSGALG00000009748	44.561	197.183	2.14568	4.99651e-05	0.00162401
ASPH: aspartate beta-hydroxylase	ENSGALG00000015479	57.4098	118.318	1.0433	0.00432896	0.0488515
ASXL1: additional sex combs like 1	ENSGALG00000006612	6.66733	14.0481	1.07519	5.01794e-05	0.0016287
ATE1: arginyltransferase 1	ENSGALG00000009502	9.70582	21.877	1.17249	4.69676e-05	0.00154595
ATF2: activating transcription factor 2	ENSGALG00000009287	4.44221	16.9649	1.9332	1.0574e-05	0.000439085
ATG16L1: autophagy related 16-like 1 (S. cerevisiae)	ENSGALG00000001619	12.1723	38.4647	1.65993	2.42354e-06	0.000120081
ATP11A: ATPase, class VI, type 11A	ENSGALG00000016835	6.49134	15.5902	1.26405	4.63894e-09	4.83299e-07
ATP2C1: ATPase, Ca++ transporting, type 2C, member 1	ENSGALG00000011580	13.5176	46.0897	1.7696	9.95128e-06	0.000415444
ATP6AP1: ATPase, H+ transporting, lysosomal accessory protein 1	ENSGALG00000008836	8.52927	36.2961	2.08932	0.000292923	0.00678842
ATP6V1C1: ATPase, H+ transporting, lysosomal 42kDa, V1 subunit C1	ENSGALG00000016066	3.29289	15.1581	2.20266	2.57616e-12	5.67169e-10
ATP6V1H: ATPase, H+ transporting, lysosomal 50/57kDa, V1 subunit H	ENSGALG00000013621	2.21241	6.83401	1.62711	0.00293185	0.0379061
ATP9B: ATPase, class II, type 9B	ENSGALG00000012656	10.2371	20.5023	1.00198	9.49661e-05	0.00269942
ATPAF1: ATP synthase mitochondrial F1 complex assembly factor 1	ENSGALG00000010444	4.38055	11.5452	1.39811	0.00218137	0.0311928
ATRIP: ATR interacting protein	ENSGALG00000004670	16.4049	35.9255	1.13088	0.0014439	0.0230324
B4GALNT4: beta-1,4-N-acetyl-galactosaminyl transferase 4	ENSGALG00000004250	8.92202	37.0404	2.05366	2.22045e-16	9.09097e-14
B4GALT1: UDP-Gal:betaGlcNAc beta 1,4- galactosyltransferase, polypeptide 1	ENSGALG00000002022	4.08219	11.3897	1.48031	0.00220677	0.0314539
B4GALT6: UDP-Gal:betaGlcNAc beta 1,4- galactosyltransferase, polypeptide 6	ENSGALG00000015151	11.4863	28.2156	1.29657	0.00305208	0.0390281
BAG1: BCL2-associated athanogene	ENSGALG00000013157	7.46608	35.1191	2.23383	0.00010937	0.00303854
BAG3: BCL2-associated athanogene 3	ENSGALG00000009433	52.936	122.129	1.20609	1.9984e-15	7.40265e-13
BAIAP2L2: BAI1-associated protein 2-like 2	ENSGALG00000012285	0.964187	12.767	3.72696	0.00168341	0.0259655
BCAP29: B-cell receptor-associated protein 29	ENSGALG00000008009	15.2252	50.1502	1.7198	0.00279273	0.0367177
BCCIP: BRCA2 and CDKN1A interacting protein	ENSGALG00000006617	23.9442	93.0274	1.95798	0.000332834	0.00747579
BCL7A: B-cell CLL/lymphoma 7A	ENSGALG00000004379	9.43577	27.6355	1.55031	0.000246984	0.00589954
BCOR: BCL6 corepressor	ENSGALG00000016245	27.3216	60.7086	1.15186	0.00227962	0.0321835
BEND6: BEN domain containing 6	ENSGALG00000016283	5.83925	12.249	1.06881	0.000486763	0.0100173
BFAR: bifunctional apoptosis regulator	ENSGALG00000003111	3.19734	12.9189	2.01454	0.000272242	0.00643047
BLMH: bleomycin hydrolase	ENSGALG00000004259	14.2839	67.1482	2.23296	5.46182e-05	0.00173655
BLZF1: basic leucine zipper nuclear factor 1	ENSGALG00000015225	4.04588	15.7373	1.95966	0.000267036	0.00632672
BMP2K: BMP2 inducible kinase	ENSGALG00000010885	26.8214	78.5737	1.55066	8.74105e-08	6.68819e-06
BMPR1A: bone morphogenetic protein receptor, type IA	ENSGALG00000002003	12.5445	47.7082	1.92718	2.99898e-06	0.000145503
BMS1: BMS1 homolog	ENSGALG00000002624	73.6924	187.733	1.34909	0.000737595	0.0138448
BNIP2: BCL2/adenovirus E1B 19kDa interacting protein 2	ENSGALG00000003788	6.60361	16.06	1.28215	0.00185955	0.0279255
BNIP3L: BCL2/adenovirus E1B 19kDa interacting protein 3-like	ENSGALG00000000231	11.4027	55.9823	2.29559	2.33091e-05	0.000880202
BORA: bora, aurora kinase A activator	ENSGALG00000002139	134.446	304.041	1.17724	1.74228e-09	1.99311e-07
BRD1: bromodomain containing 1	ENSGALG00000008526	18.6317	50.4734	1.43776	0	0
BRIP1: BRCA1 interacting protein C-terminal helicase 1	ENSGALG00000005279	6.01872	16.7212	1.47415	0.00158184	0.0247256
BTBD3: BTB (POZ) domain containing 3	ENSGALG00000009028	7.62531	18.7546	1.29837	0.00198201	0.0292747
BTBD9: BTB (POZ) domain containing 9	ENSGALG00000010131	25.5292	54.8773	1.10406	0.000469379	0.00979776
BUB1: budding uninhibited by benzimidazoles 1 homolog (yeast)	ENSGALG00000008233	38.9844	90.4924	1.2149	2.34491e-07	1.59079e-05
BUD13: BUD13 homolog (S. cerevisiae)	ENSGALG00000007046	20.808	46.8813	1.17187	0.00267277	0.0357447
C10orf118: chromosome 10 open reading frame 118	ENSGALG00000008956	10.4786	34.4353	1.71644	0.00103424	0.0180931
C12orf23	ENSGALG00000012640	25.1708	79.5349	1.65983	0.0017838	0.0270647
C12orf5	ENSGALG00000017285	0.693399	5.53265	2.99621	0.00144573	0.0230458
C15orf29: chromosome 15 open reading frame 29	ENSGALG00000009633	3.4418	14.2976	2.05454	0.000771457	0.0142885
C15orf41: chromosome 15 open reading frame 41	ENSGALG00000009801	3.6138	11.5031	1.67043	0.00076897	0.0142825
C16orf52: chromosome 16 open reading frame 52	ENSGALG00000006933	4.04177	13.5333	1.74345	3.73857e-12	7.7899e-10
C16orf62: chromosome 16 open reading frame 62	ENSGALG00000002119	15.5783	42.7427	1.45614	9.74978e-06	0.000409228
C16orf62: chromosome 16 open reading frame 62	ENSGALG00000013895	12.8331	35.2165	1.45638	0.00269752	0.0359932
C17orf28: chromosome 17 open reading frame 28	ENSGALG00000007808	3.04476	7.87102	1.37022	5.11505e-05	0.00165332
C17orf39: chromosome 17 open reading frame 39	ENSGALG00000004929	4.19393	15.9257	1.92498	0.000965997	0.0170397
C18orf32	ENSGALG00000018565	4.25123	17.1929	2.01586	0.000317377	0.00720897
C19orf40: chromosome 19 open reading frame 40	ENSGALG00000004764	6.9851	33.8919	2.27859	0.000378088	0.008324
C1D: C1D nuclear receptor corepressor	ENSGALG00000008765	33.142	102.878	1.6342	1.23917e-06	6.82043e-05
C1D: C1D nuclear receptor corepressor	ENSGALG00000017119	11.573	35.9275	1.63433	0.00119007	0.0199374
C1H21orf91	ENSGALG00000015716	12.8464	31.9296	1.31353	0.00110689	0.0191203
C1orf174: chromosome 1 open reading frame 174	ENSGALG00000000975	5.54597	17.4108	1.65047	0.00293763	0.0379599
C1orf96: chromosome 1 open reading frame 96	ENSGALG00000011084	15.6903	47.0478	1.58425	0.00180878	0.0272861
C2orf40: chromosome 2 open reading frame 40	ENSGALG00000016800	2.62397	20.0313	2.93243	0.000145186	0.00385238
C3orf23: chromosome 3 open reading frame 23	ENSGALG00000011498	15.0924	36.4155	1.27073	0.0030284	0.0387683
C3orf64	ENSGALG00000013406	13.5642	53.8716	1.98973	0	0
C3orf67: chromosome 3 open reading frame 67	ENSGALG00000007168	13.8089	60.2432	2.1252	0.00142777	0.0228219
C4H4orf41	ENSGALG00000010654	7.93688	19.1233	1.26869	5.23935e-05	0.00167954
C4orf29: chromosome 4 open reading frame 29	ENSGALG00000010201	5.80326	13.8414	1.25406	0.00192962	0.0286278
C5orf22: chromosome 5 open reading frame 22	ENSGALG00000012909	3.58717	10.5622	1.558	0.00116892	0.0197532
C6orf170: chromosome 6 open reading frame 170	ENSGALG00000014876	2.59064	5.71968	1.14263	0.00083588	0.0151687
C7orf25: chromosome 7 open reading frame 25	ENSGALG00000012333	2.34725	12.8242	2.44983	0.00442457	0.0495471
C7orf26: chromosome 7 open reading frame 26	ENSGALG00000007591	13.395	31.903	1.252	8.59063e-09	8.45905e-07
C9orf3: chromosome 9 open reading frame 3	ENSGALG00000012615	6.74519	23.293	1.78796	0.00151807	0.0239697
C9orf95	ENSGALG00000015156	5.88373	18.3248	1.63899	9.69317e-06	0.000407585
CAB39L: calcium binding protein 39-like	ENSGALG00000017005	5.00246	28.1805	2.49399	4.20375e-12	8.63779e-10
CADPS: Ca++-dependent secretion activator	ENSGALG00000007268	3.85552	20.4001	2.40358	0	0
Calm1: calmodulin 1	ENSGALG00000010023	72.3888	270.84	1.9036	8.1823e-06	0.000351902
CAPN10: calpain 10	ENSGALG00000008310	6.44169	21.0749	1.71002	0.00323933	0.040318
CAPN5: calpain 5	ENSGALG00000000750	4.04	21.3936	2.40475	3.58164e-05	0.00124382
CARS2: cysteinyl-tRNA synthetase 2, mitochondrial (putative)	ENSGALG00000016847	8.17651	25.0043	1.61262	6.87888e-05	0.0021042
CASC4: cancer susceptibility candidate 4	ENSGALG00000008208	33.8592	69.1293	1.02975	8.7658e-07	5.03861e-05
CASP3: caspase 3, apoptosis-related cysteine peptidase	ENSGALG00000010638	12.1577	43.7378	1.84701	0.000921698	0.0164321
CAST: calpastatin	ENSGALG00000014682	21.2145	54.5833	1.36341	2.05478e-07	1.41871e-05
CAT: catalase	ENSGALG00000014471	6.61664	21.2867	1.68578	5.92962e-05	0.00187761
CAZA: 2F-actin-capping protein subunit alpha-2	ENSGALG00000009385	52.5848	113.943	1.11559	0.00241867	0.03334
CBS: cystathionine-beta-synthase	ENSGALG00000016196	33.6203	83.7957	1.31754	0.00172035	0.0263258
CBWD1: COBW domain containing 1	ENSGALG00000010147	4.70498	32.4277	2.78497	6.95436e-09	6.93563e-07
CBX3: chromobox homolog 3	ENSGALG00000011038	30.6349	130.462	2.09038	1.79112e-11	3.29129e-09
CCAR1: cell division cycle and apoptosis regulator 1	ENSGALG00000004108	81.7339	192.577	1.23643	0.000279347	0.00655848
CCDC101: coiled-coil domain containing 101	ENSGALG00000020590	35.6188	137.031	1.94379	6.45087e-09	6.51706e-07
CCDC126: coiled-coil domain containing 126	ENSGALG00000010976	2.67632	10.8964	2.02554	0.00439743	0.0493854
CCDC132: coiled-coil domain containing 132	ENSGALG00000009500	12.3384	26.8432	1.1214	1.18983e-07	8.75935e-06
CCDC14: coiled-coil domain containing 14	ENSGALG00000011720	7.21849	15.5751	1.10947	0.00122042	0.0203144
CCDC141: coiled-coil domain containing 141	ENSGALG00000020788	17.3064	51.2979	1.5676	1.56839e-05	0.000622474
CCDC18: coiled-coil domain containing 18	ENSGALG00000005889	6.45467	16.028	1.31218	0.0012598	0.020792
CCDC3: coiled-coil domain containing 3	ENSGALG00000017722	6.63469	33.6479	2.34241	6.73397e-05	0.00208147
CCDC59: coiled-coil domain containing 59	ENSGALG00000010959	5.9824	20.1953	1.75522	0.0032103	0.0401494
CCDC88A: coiled-coil domain containing 88A	ENSGALG00000008104	21.4265	105.394	2.29832	3.67777e-05	0.00126404
CCNE1: cyclin E1	ENSGALG00000004494	8.94795	27.2851	1.60848	0.00285866	0.037228
CCNF: cyclin F	ENSGALG00000009201	20.8471	58.6749	1.4929	4.74834e-05	0.0015588
CCNG2: cyclin G2	ENSGALG00000010347	16.7062	46.5917	1.47969	0.0043401	0.0489299
CCP110: centriolar coiled coil protein 110kDa	ENSGALG00000006925	10.5557	21.3014	1.01293	1.23472e-08	1.15721e-06
CCT8: chaperonin containing TCP1, subunit 8 (theta)	ENSGALG00000015821	226.971	473.231	1.06003	0.00162283	0.0252427
CD151: CD151 antigen	ENSGALG00000006856	12.5807	31.3347	1.31655	0.00257347	0.0347956
CD2AP: CD2-associated protein	ENSGALG00000016720	31.225	65.8652	1.07682	0.000304915	0.00702448
CDC14B: CDC14 cell division cycle 14 homolog B (S. cerevisiae)	ENSGALG00000012627	4.95123	17.7107	1.83876	3.33215e-07	2.17822e-05
CDC45: cell division cycle 45 homolog (S. cerevisiae)	ENSGALG00000001616	10.0706	39.8117	1.98305	8.18798e-06	0.000351902
CDCA7L: cell division cycle associated 7-like	ENSGALG00000010908	69.6249	333.797	2.2613	3.96299e-05	0.00134638
CDH11: cadherin 11, type 2, OB-cadherin (osteoblast)	ENSGALG00000005278	83.6255	389.815	2.22077	0	0
CDH7: cadherin 7, type 2	ENSGALG00000013782	8.38284	41.7748	2.31712	3.91354e-06	0.000183394
CDKL2: cyclin-dependent kinase-like 2	ENSGALG00000010119	7.77103	19.3473	1.31595	0.000644524	0.0124877
CDON: cell adhesion associated, oncogene regulated	ENSGALG00000000939	11.143	26.4397	1.24657	0.00114996	0.0196174
CDV3: CDV3 homolog (mouse)	ENSGALG00000011713	121.923	264.559	1.11762	3.43298e-05	0.00120838
CELF1: CUGBP, Elav-like family member 1	ENSGALG00000008097	17.5199	47.6235	1.44268	2.99782e-07	1.99886e-05
CELSR3: cadherin, EGF LAG seven-pass G-type receptor 3 (flamingo homolog, Drosophila)	ENSGALG00000005730	2.9088	5.96663	1.03649	0.00171506	0.0262799
CENPI: centromere protein I	ENSGALG00000005038	8.47	23.4274	1.46776	5.98565e-06	0.000268629
CENPK: centromere protein K	ENSGALG00000014753	4.31709	23.4638	2.44231	0.00139352	0.02249
CENPN: Centromere protein N	ENSGALG00000013494	13.3396	28.7788	1.10929	0.00255292	0.034685
CENPQ: centromere protein Q	ENSGALG00000016692	7.33863	22.1767	1.59546	0.000407381	0.00881098
CENPT: centromere protein T	ENSGALG00000001539	24.5507	56.3884	1.19963	0.00189522	0.0282973
CEP41: centrosomal protein 41kDa	ENSGALG00000008103	1.29124	7.19386	2.478	0.000963263	0.0170043
CEP55: centrosomal protein 55kDa	ENSGALG00000006639	7.68815	20.0415	1.38228	0.00308064	0.0392021
CEP78: centrosomal protein 78kDa	ENSGALG00000015179	7.37592	19.2354	1.38287	0.00202461	0.0297312
CERK: ceramide kinase	ENSGALG00000019397	3.24933	7.0079	1.10884	0.00208116	0.0303242
CFC1/CFC1B: cripto, FRL-1, cryptic family 1	ENSGALG00000012623	5.17938	42.3292	3.0308	4.0575e-05	0.00136638
CHAF1A: chromatin assembly factor 1, subunit A (p150)	ENSGALG00000001126	24.4952	55.2865	1.17443	0.000177297	0.00450226
CHCHD3: coiled-coil-helix-coiled-coil-helix domain containing 3	ENSGALG00000006489	74.8895	249.704	1.73738	1.11022e-15	4.31821e-13
CHCHD4: coiled-coil-helix-coiled-coil-helix domain containing 4	ENSGALG00000006328	5.98631	24.345	2.02389	0.00125155	0.0207116
CHD6: chromodomain helicase DNA binding protein 6	ENSGALG00000021511	36.9761	95.0065	1.36143	2.61458e-12	5.70052e-10
CHEK2: checkpoint kinase 2	ENSGALG00000005695	15.819	32.5319	1.0402	3.45353e-07	2.24499e-05
CHFR: checkpoint with forkhead and ring finger domains, E3 ubiquitin protein ligase	ENSGALG00000002180	11.1471	22.8695	1.03675	0.000552257	0.0111392
CHIC2: cysteine-rich hydrophobic domain 2	ENSGALG00000013931	4.35451	27.5979	2.66398	2.20444e-06	0.000111353
CHM7: CHMP family, member 7	ENSGALG00000000409	9.94632	20.9956	1.07785	0.00126964	0.0209248
CHMP5: charged multivesicular body protein 5	ENSGALG00000013160	15.2646	67.3077	2.14058	0.000290486	0.00675205
CHORDC1: cysteine and histidine-rich domain (CHORD)-containing, zinc binding protein 1	ENSGALG00000017233	12.427	41.2423	1.73065	0.000704306	0.0133196
CHP1: calcineurin-like EF hand protein 1	ENSGALG00000008569	12.1527	37.6067	1.62971	0.00336476	0.041182
CHSY1: chondroitin sulfate synthase 1	ENSGALG00000007154	19.4256	47.9836	1.30458	0.000309968	0.0070919
CIRBP: cold inducible RNA binding protein	ENSGALG00000012225	96.744	329.45	1.76782	3.15303e-14	9.43363e-12
CIRH1A: cirrhosis, autosomal recessive 1A (cirhin)	ENSGALG00000000638	0.524396	12.2204	4.54249	2.31048e-05	0.000876744
CLK4: CDC-like kinase 4	ENSGALG00000006057	19.0245	46.6161	1.29297	9.86083e-09	9.50919e-07
CLN8: CLN8 protein	ENSGALG00000019891	4.52441	13.0201	1.52494	0.00296303	0.0381613
CLNS1A: chloride channel, nucleotide-sensitive, 1A	ENSGALG00000008574	20.3495	123.178	2.59768	2.69485e-05	0.000997699
CLSTN1: calsyntenin 1	ENSGALG00000002606	17.1715	35.2439	1.03736	2.29648e-05	0.000874272
CLUAP1: clusterin associated protein 1	ENSGALG00000013395	7.60654	15.3865	1.01636	3.99334e-05	0.00134867
CLVS2: clavesin 2	ENSGALG00000014853	2.44739	9.71094	1.98837	0.00213756	0.0307928
CMAS: cytidine monophosphate N-acetylneuraminic acid synthetase	ENSGALG00000013229	3.05416	17.9431	2.55459	1.01196e-05	0.000420963
CMPK1: cytidine monophosphate (UMP-CMP) kinase 1, cytosolic	ENSGALG00000010481	5.69456	28.8849	2.34266	8.59484e-05	0.00247627
CMTM4: CKLF-like MARVEL transmembrane domain containing 4	ENSGALG00000005251	4.84782	15.9088	1.71442	0.00239766	0.0331318
CNBP: CCHC-type zinc finger, nucleic acid binding protein	ENSGALG00000005001	143.076	723.885	2.33898	2.22045e-16	9.09097e-14
CNOT6: CCR4-NOT transcription complex, subunit 6	ENSGALG00000006026	21.8156	49.7806	1.19022	0.000169676	0.00434057
COG5: component of oligomeric golgi complex 5	ENSGALG00000008035	17.7318	37.3562	1.07501	6.06125e-05	0.00190379
COL11A1: collagen, type XI, alpha 1	ENSGALG00000005180	16.6887	48.4345	1.53716	1.35856e-08	1.24821e-06
COL27A1: collagen, type XXVII, alpha 1	ENSGALG00000006958	6.25925	20.1758	1.68857	9.06947e-07	5.20035e-05
COL2A1: collagen, type II, alpha 1	ENSGALG00000013587	8.10238	28.3851	1.80872	0.000787025	0.0145192
COL9A1: collagen, type IX, alpha 1	ENSGALG00000015970	6.48844	61.9857	3.25599	6.08047e-09	6.16957e-07
COL9A3: collagen, type IX, alpha 3	ENSGALG00000005628	2.74576	28.1529	3.358	3.8036e-07	2.43859e-05
COMMD8: COMM domain containing 8	ENSGALG00000014198	14.3053	62.3424	2.12366	0.000591623	0.0116596
COPE: coatomer protein complex, subunit epsilon	ENSGALG00000003153	42.6323	130.455	1.61353	0.00310853	0.0393831
COPS2: COP9 constitutive photomorphogenic homolog subunit 2 (Arabidopsis)	ENSGALG00000000404	32.0581	66.011	1.04202	6.62091e-07	3.98227e-05
COPS3: COP9 constitutive photomorphogenic homolog subunit 3 (Arabidopsis)	ENSGALG00000004834	31.2998	64.6486	1.04647	0.000143179	0.00381871
COTL1: coactosin-like 1 (Dictyostelium)	ENSGALG00000017644	14.2168	82.624	2.53896	8.34227e-05	0.00243054
COX11: cytochrome c oxidase assembly homolog 11	ENSGALG00000003017	13.6228	32.1824	1.24025	0.00043172	0.00916746
CPPED1: calcineurin-like phosphoesterase domain containing 1	ENSGALG00000002940	6.48352	38.2529	2.56072	5.88395e-08	4.62336e-06
CPSF2: cleavage and polyadenylation specific factor 2, 100kDa	ENSGALG00000010783	4.06985	18.1867	2.15983	0.000104085	0.00291251
CPSF6: cleavage and polyadenylation specific factor 6, 68kDa	ENSGALG00000019355	25.4192	64.9918	1.35434	0.000323416	0.00731352
CRAMP1L: Crm, cramped-like (Drosophila)	ENSGALG00000009341	12.214	28.3395	1.21427	2.04391e-06	0.000103929
CRCP: CGRP receptor component	ENSGALG00000002587	33.3861	70.1362	1.07091	0.000239474	0.00576739
CREBL2: cAMP responsive element binding protein-like 2	ENSGALG00000014314	6.77699	13.8686	1.0331	0.000320181	0.00725444
CRELD2: cysteine-rich with EGF-like domains 2	ENSGALG00000008551	8.63826	33.4156	1.95171	7.30857e-06	0.000321205
CRK: Adapter molecule crk	ENSGALG00000002656	17.9607	41.541	1.20969	2.04281e-14	6.44231e-12
CRNKL1: crooked neck pre-mRNA splicing factor-like 1 (Drosophila)	ENSGALG00000008429	12.2798	33.4884	1.44738	2.1945e-05	0.000838183
CRY1: cryptochrome 1 (photolyase-like)	ENSGALG00000012638	22.7818	48.4822	1.08957	0.000188207	0.00472899
CRYM: crystallin, mu	ENSGALG00000002484	1.62266	8.11679	2.32255	0.000267961	0.00633576
CRYZ: crystallin, zeta (quinone reductase)	ENSGALG00000011361	6.37443	27.3095	2.09904	1.47619e-09	1.71392e-07
CSNK1D: casein kinase 1, delta	ENSGALG00000002719	29.3371	72.4587	1.30443	7.57241e-06	0.000329696
CSNK1G1: casein kinase 1, gamma 1	ENSGALG00000002279	26.8596	56.5236	1.07342	2.32112e-05	0.000879349
CSRP2BP: CSRP2 binding protein	ENSGALG00000008707	15.4626	33.5874	1.11914	0.00241627	0.0333265
CTBP1: C-terminal binding protein 1	ENSGALG00000015718	49.3424	101.197	1.03627	1.19998e-07	8.80629e-06
CTCF: CCCTC-binding factor (zinc finger protein)	ENSGALG00000001817	17.3555	50.094	1.52924	0.00395549	0.046224
CTDP1: CTD (carboxy-terminal domain, RNA polymerase II, polypeptide A) phosphatase, subunit 1	ENSGALG00000012653	16.9167	35.9365	1.08701	1.67194e-06	8.76809e-05
CTDSPL: CTD (carboxy-terminal domain, RNA polymerase II, polypeptide A) small phosphatase-like	ENSGALG00000005710	28.6161	70.7871	1.30666	0.000567542	0.011301
CTDSPL2: CTD (carboxy-terminal domain, RNA polymerase II, polypeptide A) small phosphatase like 2	ENSGALG00000008199	17.3495	37.8456	1.12523	0.00369536	0.0440217
CTH: cystathionase (cystathionine gamma-lyase)	ENSGALG00000011331	35.0829	198.1	2.49739	3.36356e-06	0.000161513
CTPS1: CTP synthase 1	ENSGALG00000000675	30.1349	102.294	1.76322	7.83227e-05	0.00232192
CUL1: cullin 1	ENSGALG00000012402	54.9024	154.664	1.49419	4.13729e-06	0.000193104
CUL2: cullin 2	ENSGALG00000007095	26.0341	67.844	1.38182	4.21885e-15	1.5147e-12
CUL3: cullin 3	ENSGALG00000005108	54.8759	149.783	1.44863	0.00325473	0.0404235
CUL5: cullin 5	ENSGALG00000017165	17.5887	37.9337	1.10883	0.000162982	0.00421208
CUTC: cutC copper transporter homolog (E. coli)	ENSGALG00000007424	18.2157	62.8746	1.7873	0.00230992	0.0324934
CXCR4: chemokine (C-X-C motif) receptor 4	ENSGALG00000012357	34.9683	114.229	1.70782	0.00084457	0.0153026
CXorf23: chromosome X open reading frame 23	ENSGALG00000016418	6.29901	14.114	1.16393	0.0029194	0.0377871
CYP20A1: cytochrome P450, family 20, subfamily A, polypeptide 1	ENSGALG00000008730	15.8263	39.347	1.31393	0.00441989	0.0495303
CYP27C1: cytochrome P450 family 27 subfamily C polypeptide 1	ENSGALG00000011532	7.57628	25.0246	1.72378	0.00214761	0.0308804
CYP2R1: cytochrome P450, family 2, subfamily R, polypeptide 1	ENSGALG00000006050	7.83687	19.8686	1.34214	0.00336874	0.041182
CZH9ORF80	ENSGALG00000020528	22.901	80.3333	1.81059	0.00117536	0.0197903
DAB1: disabled homolog 1 (Drosophila)	ENSGALG00000010857	12.5063	27.5773	1.14083	5.50951e-06	0.000249605
DACT2: dapper, antagonist of beta-catenin, homolog 2 (Xenopus laevis)	ENSGALG00000011288	46.0664	186.332	2.01609	1.27339e-06	6.96166e-05
DAGLA: diacylglycerol lipase, alpha	ENSGALG00000013306	12.1937	35.9484	1.55979	7.56714e-05	0.00225248
DBR1: Lariat debranching enzyme	ENSGALG00000001190	12.0359	30.7164	1.35166	0.0031322	0.0396185
DCAF13: DDB1 and CUL4 associated factor 13	ENSGALG00000016073	28.9829	77.1629	1.4127	0.00419869	0.0480554
DCAF7: DDB1 and CUL4 associated factor 7	ENSGALG00000000510	7.00884	17.535	1.32299	0.00140629	0.0226024
DCP2: decapping enzyme homolog	ENSGALG00000000215	16.0259	35.6523	1.15359	0.00415673	0.0477155
DCUN1D4: DCN1, defective in cullin neddylation 1, domain containing 4 (S. cerevisiae)	ENSGALG00000014078	4.71762	18.4923	1.9708	1.84711e-06	9.47383e-05
DDI2: DNA-damage inducible 1 homolog 2 (S. cerevisiae)	ENSGALG00000010072	28.5098	80.9643	1.50583	1.61823e-05	0.000640077
DDX1: DEAD (Asp-Glu-Ala-Asp) box polypeptide 1	ENSGALG00000016461	56.7288	132.987	1.22913	0.000473349	0.00984668
DDX17: DEAD (Asp-Glu-Ala-Asp) box helicase 17	ENSGALG00000012247	9.31216	27.1023	1.54123	0.00426561	0.0484884
DDX18: DEAD (Asp-Glu-Ala-Asp) box polypeptide 18	ENSGALG00000012147	33.6594	108.853	1.6933	0.00011059	0.00305788
DDX20: DEAD (Asp-Glu-Ala-Asp) box polypeptide 20	ENSGALG00000001504	9.3268	24.9414	1.41909	2.70542e-05	0.000997699
DDX21: DEAD (Asp-Glu-Ala-Asp) box helicase 21	ENSGALG00000004144	26.984	74.6197	1.46745	0.00324533	0.0403711
DDX3X: DEAD/H (Asp-Glu-Ala-Asp/His) box polypeptide 3	ENSGALG00000016231	72.0242	201.678	1.4855	0.00136119	0.0220598
DDX49: DEAD (Asp-Glu-Ala-Asp) box polypeptide 49	ENSGALG00000003130	10.6512	22.1475	1.05613	0.00055667	0.0111697
DDX5: DEAD (Asp-Glu-Ala-Asp) box helicase 5	ENSGALG00000003532	142.282	376.251	1.40295	0.00400484	0.0466605
DDX54: DEAD (Asp-Glu-Ala-Asp) box polypeptide 54	ENSGALG00000007490	6.75491	15.9756	1.24186	4.20704e-05	0.00140659
DENND1B: DENN/MADD domain containing 1B	ENSGALG00000002246	1.8834	6.62349	1.81425	0.00224575	0.0317824
DENND4A: DENN/MADD domain containing 4A	ENSGALG00000007500	28.7198	62.8681	1.13028	0.000876722	0.0157264
DENND5A: DENN/MADD domain containing 5A	ENSGALG00000005840	26.9447	78.5564	1.54373	0	0
DERA: deoxyribose-phosphate aldolase (putative)	ENSGALG00000013095	3.14444	12.7722	2.02213	0.00440228	0.0494033
DFNA5: deafness, autosomal dominant 5	ENSGALG00000010997	3.74022	12.2076	1.70658	0.00315118	0.0397433
DICER1: dicer 1, ribonuclease type III	ENSGALG00000010999	49.4312	129.758	1.39233	2.96413e-10	3.95279e-08
DIP2A: DIP2 disco-interacting protein 2 homolog A	ENSGALG00000006228	12.4344	40.5462	1.70523	2.64953e-11	4.61433e-09
DIP2B: DIP2 disco-interacting protein 2 homolog B	ENSGALG00000006139	16.8425	46.858	1.47619	9.07277e-05	0.00259475
DISC1: disrupted in schizophrenia 1	ENSGALG00000020014	3.37023	19.3871	2.52418	0.000352387	0.00783205
DLC1: deleted in liver cancer 1	ENSGALG00000013715	25.0242	74.7272	1.57831	0.00256954	0.0347626
DMAP1: DNA methyltransferase 1 associated protein 1	ENSGALG00000010104	15.2955	32.9176	1.10575	0.00154676	0.0243112
DNAH10: dynein, axonemal, heavy chain 10	ENSGALG00000003170	4.0003	15.901	1.99094	0.00041535	0.00892768
DNAJA2: DnaJ (Hsp40) homolog, subfamily A, member 2	ENSGALG00000004115	59.6145	188.495	1.66079	0.000543697	0.0110102
DNAJA4: DnaJ (Hsp40) homolog, subfamily A, member 4	ENSGALG00000003251	12.0312	43.6003	1.85756	6.10663e-05	0.00191289
DNAJB4: DnaJ (Hsp40) homolog, subfamily B, member 4	ENSGALG00000008916	12.9607	31.9277	1.30067	0.000759032	0.0141708
DNAJB6: DnaJ (Hsp40) homolog, subfamily B, member 6	ENSGALG00000006477	15.3203	42.2487	1.46346	0.000772965	0.0142937
DNAJB9: DnaJ (Hsp40) homolog, subfamily B, member 9	ENSGALG00000009492	6.06149	21.2964	1.81286	0.000513578	0.0104859
DNAJC13: DnaJ (Hsp40) homolog, subfamily C, member 13	ENSGALG00000011678	18.2646	40.2077	1.13842	1.08663e-07	8.11599e-06
DNAJC21: DnaJ (Hsp40) homolog, subfamily C, member 21	ENSGALG00000003387	5.66507	18.2232	1.68561	0.00013798	0.00369696
DNAJC5: DnaJ (Hsp40) homolog, subfamily C, member 5	ENSGALG00000006046	20.6946	48.5133	1.22912	0.00247022	0.0338904
DNAL4: dynein, axonemal, light chain 4	ENSGALG00000012201	7.83245	30.0294	1.93884	0.00384537	0.0452772
DPM1: dolichyl-phosphate mannosyltransferase polypeptide 1, catalytic subunit	ENSGALG00000017366	15.7936	84.8454	2.4255	1.48933e-05	0.000599249
DPP6: dipeptidyl-peptidase 6	ENSGALG00000006314	5.55391	28.4877	2.35877	5.66591e-12	1.13987e-09
DPP8: dipeptidyl-peptidase 8	ENSGALG00000007437	6.026	15.0106	1.31671	6.21491e-10	7.69916e-08
DPP9: dipeptidyl-peptidase 9	ENSGALG00000004200	11.2409	24.9241	1.14878	3.4002e-05	0.00120158
DPY19L1: dpy-19-like 1 (C. elegans)	ENSGALG00000012158	15.8218	52.2132	1.7225	3.38037e-10	4.41154e-08
DPY19L4: dpy-19-like 4 (C. elegans)	ENSGALG00000015975	11.7022	33.3588	1.51129	3.23954e-07	2.13563e-05
DUS2L: dihydrouridine synthase 2-like, SMM1 homolog	ENSGALG00000003407	7.7923	21.9536	1.49433	0.000772305	0.0142929
DUSP4: dual specificity protein phosphatase 4	ENSGALG00000011419	18.1921	48.8981	1.42647	0.00036582	0.00808436
DUT: deoxyuridine triphosphatase	ENSGALG00000004954	24.5127	65.5646	1.41939	8.39822e-06	0.000359614
DYNC1LI2: dynein, cytoplasmic 1, light intermediate chain 2	ENSGALG00000005241	3.96904	14.1462	1.83355	0.00408672	0.0471437
DYNLRB1: dynein, light chain, roadblock-type 1	ENSGALG00000001913	33.8581	92.699	1.45305	0.00186095	0.0279285
DYX1C1: dyslexia susceptibility 1 candidate 1	ENSGALG00000004387	7.15278	14.6064	1.03003	0.00067742	0.0129481
E2F6: E2F transcription factor 6	ENSGALG00000016454	8.00639	24.1214	1.59109	0.000292551	0.00678655
E4F1: E4F transcription factor 1	ENSGALG00000005900	12.4591	31.7734	1.35062	2.50208e-08	2.17877e-06
EBF1: early B-cell factor 1	ENSGALG00000003699	31.4766	188.994	2.58599	1.50106e-09	1.73417e-07
ECD: ecdysoneless homolog (Drosophila)	ENSGALG00000002686	9.87714	35.5953	1.84952	0.000902393	0.0161373
ECHDC2: enoyl CoA hydratase domain containing 2	ENSGALG00000010647	9.35805	49.4424	2.40147	4.18611e-05	0.0014016
EDNRA: endothelin receptor type A	ENSGALG00000010013	5.64981	17.1897	1.60527	0.00383888	0.0452464
EDNRB: endothelin receptor type B precursor	ENSGALG00000016912	2.28728	44.2669	4.27452	8.81315e-11	1.33145e-08
EFCAB7: EF-hand calcium binding domain 7	ENSGALG00000007821	33.5068	88.5658	1.40229	1.94863e-10	2.67501e-08
EFCAB7: EF-hand calcium binding domain 7	ENSGALG00000010998	4.92871	13.0256	1.40207	0.000328337	0.00738189
EFNA5: ephrin-A5	ENSGALG00000000280	71.0163	192.467	1.43839	0.00245699	0.0337684
EFTUD1: elongation factor Tu GTP binding domain containing 1	ENSGALG00000006225	10.1554	28.6531	1.49644	0.00111917	0.0192468
EIF1AY: X-linked eukaryotic translation initiation factor 1A	ENSGALG00000016410	22.9652	136.589	2.57232	4.61609e-09	4.83075e-07
EIF2S2: eukaryotic translation initiation factor 2, subunit 2 beta, 38kDa	ENSGALG00000002045	156.516	440.326	1.49226	0.000443771	0.00939772
EIF4A2: eukaryotic translation initiation factor 4A2	ENSGALG00000008684	51.8046	149.616	1.53011	0.00248181	0.0340066
EIF4A3: eukaryotic translation initiation factor 4A3	ENSGALG00000008530	75.3881	204.799	1.4418	1.52767e-12	3.49521e-10
EIF4G1: eukaryotic translation initiation factor 4 gamma, 1	ENSGALG00000008520	37.7602	77.5589	1.03843	1.79928e-06	9.2693e-05
EIF5A2: eukaryotic translation initiation factor 5A2	ENSGALG00000009309	304.792	933.193	1.61435	1.7189e-07	1.20462e-05
ELAC2: elaC homolog 2 (E. coli)	ENSGALG00000001036	21.1365	46.2226	1.12886	0.000583946	0.0115684
Enah: enabled homolog (Drosophila)	ENSGALG00000009303	34.1687	78.9709	1.20864	0.000145267	0.00385238
ENC1: ectodermal-neural cortex 1 (with BTB-like domain)	ENSGALG00000014930	21.6103	108.198	2.32388	2.1789e-05	0.000833591
Entpd4/Gm21685: ectonucleoside triphosphate diphosphohydrolase 4	ENSGALG00000000390	6.18979	13.4655	1.1213	5.29026e-05	0.00169354
EPC2: enhancer of polycomb homolog 2	ENSGALG00000012453	26.6946	60.9246	1.19048	0.00420084	0.0480562
ERCC3: excision repair cross-complementing rodent repair deficiency, complementation group 3	ENSGALG00000011515	14.8949	38.1727	1.35772	0.000101645	0.002859
ERCC3: excision repair cross-complementing rodent repair deficiency, complementation group 3	ENSGALG00000013932	4.50133	11.5354	1.35765	4.15918e-05	0.00139458
ERCC6: excision repair cross-complementing rodent repair deficiency, complementation group 6	ENSGALG00000006254	18.8028	39.6455	1.07621	8.82503e-10	1.05615e-07
ERI3: ERI1 exoribonuclease family member 3	ENSGALG00000010106	46.7613	151.51	1.69602	1.78922e-06	9.2693e-05
ESF1: ESF1, nucleolar pre-rRNA processing protein, homolog	ENSGALG00000008708	25.012	85.2724	1.76946	0.000119433	0.00324849
ETF1: eukaryotic translation termination factor 1	ENSGALG00000002262	43.9109	122.341	1.47825	7.32988e-07	4.33057e-05
ETNK1: ethanolamine kinase 1	ENSGALG00000013205	9.47324	38.7456	2.0321	4.55191e-14	1.32785e-11
ETS1: v-ets erythroblastosis virus E26 oncogene homolog 1 (avian)	ENSGALG00000001143	15.9917	58.9163	1.88134	4.96834e-05	0.0016171
EVL: Enah/Vasp-like	ENSGALG00000011209	8.32409	28.7027	1.78582	0.00179089	0.027139
EXO1: exonuclease 1	ENSGALG00000010748	27.8077	77.7443	1.48325	0.000810744	0.0147816
EXOC1: exocyst complex component 1	ENSGALG00000013778	7.58935	19.6222	1.37044	7.51073e-06	0.000328236
EXOSC8: exosome component 8	ENSGALG00000017048	31.5771	98.4344	1.64028	0.00272732	0.0361857
EXTL3: exostoses (multiple)-like 3	ENSGALG00000016630	13.5913	32.2332	1.24586	0.000930834	0.0165697
EZH2: enhancer of zeste homolog 2 (Drosophila)	ENSGALG00000012405	29.5432	86.6373	1.55216	0.00107477	0.0186941
FABP3: fatty acid binding protein 3, muscle and heart (mammary-derived growth inhibitor)	ENSGALG00000000620	1.97495	31.1067	3.97734	0.000428044	0.0091155
FADD: Fas (TNFRSF6)-associated via death domain	ENSGALG00000007625	8.92231	31.2702	1.8093	0.00307185	0.0391736
FADS1: fatty acid desaturase 1	ENSGALG00000020485	1.17623	8.55803	2.86311	0.000543975	0.0110102
FAF1: Fas (TNFRSF6) associated factor 1	ENSGALG00000010536	15.0288	47.6548	1.66489	2.51297e-07	1.69006e-05
FAM105B: family with sequence similarity 105, member B	ENSGALG00000019543	1.22698	5.5441	2.17584	0.00341371	0.041471
FAM114A2: family with sequence similarity 114, member A2	ENSGALG00000004068	7.89814	21.2387	1.42711	0.00115245	0.0196312
FAM122A: family with sequence similarity 122A	ENSGALG00000006127	46.5907	94.4571	1.01962	0.00204381	0.0298933
FAM126A: family with sequence similarity 126, member A	ENSGALG00000010925	8.85063	20.1246	1.18511	9.56914e-06	0.000403096
FAM149A: family with sequence similarity 149, member A	ENSGALG00000013503	2.78259	8.55525	1.62038	0.0004129	0.00890375
FAM169A: family with sequence similarity 169, member A	ENSGALG00000014943	13.2468	45.7866	1.78928	1.54001e-10	2.16501e-08
FAM175B: family with sequence similarity 175, member B	ENSGALG00000009712	16.0807	37.4979	1.22147	0.000103978	0.00291251
FAM178B: family with sequence similarity 178, member B	ENSGALG00000003481	0.350373	17.4213	5.63582	0.00329289	0.0407456
FAM198A: family with sequence similarity 198, member A	ENSGALG00000011521	1.504	10.7962	2.84365	4.8255e-05	0.00157942
FAM199X: family with sequence similarity 199, X-linked	ENSGALG00000008872	4.61178	14.4685	1.64952	0.00359832	0.0431521
FAM49A: family with sequence similarity 49, member A	ENSGALG00000016463	15.5507	35.3224	1.18361	0.00256215	0.034723
FAM49B: family with sequence similarity 49, member B	ENSGALG00000016306	20.6464	52.5591	1.34805	0.00038423	0.00843535
FAM53A	ENSGALG00000015713	10.6287	24.2511	1.19009	0.00325685	0.040425
FAM54A: family with sequence similarity 54, member A	ENSGALG00000019967	15.6184	35.295	1.17621	0.00400443	0.0466605
FAM89A: family with sequence similarity 89, member A	ENSGALG00000023110	36.7249	118.197	1.68636	0.00255975	0.0347193
FASTKD2: FAST kinase domains 2	ENSGALG00000008529	15.9604	38.6459	1.27582	5.21131e-06	0.000237532
FBN2: fibrillin 2	ENSGALG00000014686	12.1015	47.928	1.98569	1.08753e-10	1.60631e-08
FBXL3: F-box and leucine-rich repeat protein 3	ENSGALG00000016916	5.45858	20.8449	1.9331	0.0023454	0.0326809
FBXL4: F-box and leucine-rich repeat protein 4	ENSGALG00000015490	8.75158	26.3034	1.58763	0.000157471	0.00408776
FBXO38: F-box protein 38	ENSGALG00000000546	6.26622	15.4876	1.30545	1.29619e-05	0.000530689
FBXW2: F-box and WD-40 domain protein 2	ENSGALG00000000864	7.9499	22.1806	1.48029	8.70466e-05	0.00250387
FECH: ferrochelatase	ENSGALG00000003066	6.64268	24.3844	1.87612	7.44374e-05	0.00222426
FEM1B: fem-1 homolog b	ENSGALG00000023277	16.1577	49.5408	1.6164	0.000220785	0.00536715
FGFR1OP: FGFR1 oncogene partner	ENSGALG00000011423	10.9925	30.6781	1.48069	6.91175e-05	0.0021042
FIGN: fidgetin	ENSGALG00000011069	25.2394	73.8723	1.54935	0.00237241	0.0329582
FIP1L1: FIP1 like 1 (S. cerevisiae)	ENSGALG00000013943	48.3282	128.999	1.41642	0.000342387	0.0076462
FN3K: fructosamine 3 kinase	ENSGALG00000001531	1.23811	7.99582	2.69111	5.83544e-05	0.00185029
FNDC1: fibronectin type III domain containing 1	ENSGALG00000011663	4.1498	27.2885	2.71718	3.73234e-06	0.000176677
FoxD3: forkhead box D3	FOXD3	6.08377	27.9032	2.19739	0.000414199	0.00891711
FOXN2: forkhead box N2	ENSGALG00000008942	6.51123	14.9358	1.19777	1.83473e-11	3.34509e-09
FOXRED2: FAD-dependent oxidoreductase domain containing 2	ENSGALG00000012530	8.63132	31.8595	1.88407	8.04982e-07	4.6731e-05
FREM2: FRAS1 related extracellular matrix protein 2	ENSGALG00000017041	10.274	34.1923	1.73467	5.9597e-08	4.66716e-06
FRMPD4: FERM and PDZ domain containing 4	ENSGALG00000016594	5.19578	14.2876	1.45935	0.000584887	0.0115772
FRS2: fibroblast growth factor receptor substrate 2	ENSGALG00000009966	10.7476	33.5224	1.64111	0.00162387	0.0252427
FRZB: frizzled-related protein	ENSGALG00000002763	8.43224	50.6383	2.58624	1.10469e-08	1.05657e-06
FTSJ3: FtsJ homolog 3 (E. coli)	ENSGALG00000000332	6.97298	19.0233	1.44792	0.00284662	0.0371921
FUBP1: far upstream element (FUSE) binding protein 1	ENSGALG00000008939	137.79	298.414	1.11484	3.32285e-07	2.17822e-05
FUT8: fucosyltransferase 8 (alpha (1,6) fucosyltransferase)	ENSGALG00000008078	13.8244	29.457	1.09139	0.00195407	0.0289354
FXR1: fragile X mental retardation, autosomal homolog 1	ENSGALG00000008864	45.2012	109.982	1.28283	0	0
FYN: FYN oncogene related to SRC, FGR, YES	ENSGALG00000015022	9.57848	41.9789	2.1318	0.000105115	0.00293079
G2E3: G2/M-phase specific E3 ubiquitin protein ligase	ENSGALG00000009907	36.4516	98.3152	1.43143	0.000108692	0.00302328
G3BP1: GTPase activating protein (SH3 domain) binding protein 1	ENSGALG00000004160	72.8141	161.883	1.15267	0.00268338	0.0358454
GABARAPL1: GABA(A) receptor-associated protein like 1	ENSGALG00000014723	8.30375	29.824	1.84464	0.000951865	0.0168541
GAL3ST1: galactose-3-O-sulfotransferase 1	ENSGALG00000007781	0.827275	9.37112	3.50178	5.69869e-11	8.98583e-09
GALNT1: UDP-N-acetyl-alpha-D-galactosamine:polypeptide N-acetylgalactosaminyltransferase 1 (GalNAc-T1)	ENSGALG00000013135	18.905	59.6496	1.65774	0.0016985	0.0260947
GALNT10: UDP-N-acetyl-alpha-D-galactosamine:polypeptide N-acetylgalactosaminyltransferase 10 (GalNAc-T10)	ENSGALG00000004033	3.17521	9.00835	1.50441	0.00151587	0.0239512
GALNT2: UDP-N-acetyl-alpha-D-galactosamine:polypeptide N-acetylgalactosaminyltransferase 2 (GalNAc-T2)	ENSGALG00000011106	5.70538	20.2421	1.82697	9.32693e-06	0.000393603
GAN: gigaxonin	ENSGALG00000013437	10.6018	32.4593	1.61433	4.75035e-06	0.000217798
GARS: glycyl-tRNA synthetase	ENSGALG00000005694	38.5856	113.081	1.55123	3.52114e-05	0.00123013
GART: phosphoribosylglycinamide formyltransferase, phosphoribosylglycinamide synthetase, phosphoribosylaminoimidazole synthetase	ENSGALG00000015983	15.3248	61.9807	2.01595	4.85514e-05	0.00158689
GATM: glycine amidinotransferase (L-arginine:glycine amidinotransferase)	ENSGALG00000023435	3.96881	15.5084	1.96627	0.00354986	0.0427467
GBE1: glucan (1,4-alpha-), branching enzyme 1	ENSGALG00000015506	4.31434	13.4713	1.64268	0.00428116	0.0485981
GCFC1: GC-rich sequence DNA-binding factor 1	ENSGALG00000015933	18.6532	44.8538	1.26581	2.94097e-05	0.00107072
GCLC: glutamate-cysteine ligase, catalytic subunit	ENSGALG00000016313	16.9795	41.7395	1.29762	1.31717e-08	1.21979e-06
GCLM: glutamate-cysteine ligase, modifier subunit	ENSGALG00000005782	60.209	163.409	1.44044	0.00114253	0.0195191
GCN1L1: GCN1 general control of amino-acid synthesis 1-like 1 (yeast)	ENSGALG00000007276	43.3009	87.406	1.01334	0.000125579	0.00340377
GDI2: GDP dissociation inhibitor 2	ENSGALG00000008169	110.979	266.793	1.26543	3.69832e-05	0.00126923
GFPT1: glutamine--fructose-6-phosphate transaminase 1	ENSGALG00000000085	20.0952	47.337	1.23612	8.3424e-05	0.00243054
GFPT2: glutamine-fructose-6-phosphate transaminase 2	ENSGALG00000013760	27.5514	82.7755	1.58708	0	0
GFRA2: GDNF family receptor alpha 2	ENSGALG00000001795	15.0852	50.7414	1.75003	0.00179507	0.0271671
GFRA3: GDNF family receptor alpha 3	ENSGALG00000007620	3.85425	15.0401	1.96429	0.000932331	0.0165828
GJB1: gap junction protein, beta 1, 32kDa	ENSGALG00000005541	2.02135	12.6979	2.65119	0.00373359	0.044364
GK: glycerol kinase	ENSGALG00000016285	5.598	23.2891	2.05667	4.25416e-10	5.4251e-08
GLE1: GLE1 RNA export mediator homolog (yeast)	ENSGALG00000004738	12.2293	34.4461	1.494	1.85364e-05	0.000717612
GLMN: glomulin, FKBP associated protein	ENSGALG00000005959	2.27731	11.9246	2.38854	0.00036174	0.00801703
GLUD1: glutamate dehydrogenase 1	ENSGALG00000002020	15.0114	49.7053	1.72734	0.00129673	0.0212513
Gm5424: argininosuccinate synthase pseudogene	ENSGALG00000023689	1.42431	7.07142	2.31174	0.00397285	0.0464036
GMFB: glia maturation factor, beta	ENSGALG00000012208	21.0929	81.3243	1.94693	2.7166e-06	0.000133468
GNAI1: guanine nucleotide binding protein (G protein), alpha inhibiting activity polypeptide 1	ENSGALG00000008382	34.6468	164.255	2.24514	3.01101e-11	5.15931e-09
GNAI2: guanine nucleotide binding protein (G protein), alpha inhibiting activity polypeptide 2	ENSGALG00000004639	37.9955	125.678	1.72583	0.000714105	0.0134831
GNAI3: guanine nucleotide binding protein (G protein), alpha inhibiting activity polypeptide 3	ENSGALG00000000041	48.7128	143.876	1.56245	5.33152e-06	0.000242066
GNAQ: guanine nucleotide binding protein (G protein), q polypeptide	ENSGALG00000015177	8.22848	25.7515	1.64596	0.00155129	0.0243624
GNAS: GNAS complex locus	ENSGALG00000007509	25.6631	73.1579	1.51132	0.00322991	0.0402738
GNL3: guanine nucleotide binding protein-like 3 (nucleolar)	ENSGALG00000001613	164.226	392.17	1.2558	0.00020725	0.00512083
GNPNAT1: glucosamine-phosphate N-acetyltransferase 1	ENSGALG00000012414	5.96947	21.3973	1.84175	0.00357496	0.042918
GOGA7: Golgin subfamily A member 7	ENSGALG00000003483	34.6156	78.0168	1.17236	2.77485e-05	0.00101819
GOLGA5: golgin A5	ENSGALG00000010813	7.89088	15.995	1.01937	0.000451451	0.00950729
GOPC: golgi-associated PDZ and coiled-coil motif containing	ENSGALG00000014902	13.4605	35.8698	1.41403	0.00355499	0.0427864
GORASP1: golgi reassembly stacking protein 1, 65kDa	ENSGALG00000006033	7.58701	21.7346	1.51839	0.00398662	0.0464946
GPAM: glycerol-3-phosphate acyltransferase, mitochondrial	ENSGALG00000008795	9.38501	30.5925	1.70475	2.93642e-05	0.00107072
GPATCH1: G patch domain containing 1	ENSGALG00000004839	34.2865	69.6794	1.02309	0.00118489	0.0198802
GPD2: glycerol-3-phosphate dehydrogenase 2 (mitochondrial)	ENSGALG00000012543	5.07666	12.5174	1.30198	0.000609512	0.0119531
GPHR: Golgi pH regulator	ENSGALG00000015491	2.98848	8.09759	1.43808	6.27478e-06	0.00027999
GPM6B: glycoprotein M6B	ENSGALG00000016575	10.4055	37.2908	1.84147	3.73794e-11	6.23088e-09
GPR180: G protein-coupled receptor 180	ENSGALG00000016897	2.50079	12.498	2.32125	3.8473e-11	6.32285e-09
GRAMD4: GRAM domain containing 4	ENSGALG00000013182	7.01982	15.1598	1.11074	0.0010895	0.0189039
GRB10: growth factor receptor-bound protein 10	ENSGALG00000013100	6.51705	30.7097	2.2364	4.60743e-13	1.18158e-10
GRIN2A: glutamate receptor, ionotropic, N-methyl D-aspartate 2A	ENSGALG00000007278	1.68701	14.1241	3.06561	0.000280194	0.00657175
GRSF1: G-rich RNA sequence binding factor 1	ENSGALG00000011568	63.7972	143.232	1.16678	0.00295597	0.0380914
GSN: gelsolin	ENSGALG00000001446	26.2388	78.6846	1.58438	0.00256039	0.0347193
GTF2H5: general transcription factor IIH, polypeptide 5	ENSGALG00000013733	6.90128	23.7267	1.78157	6.61492e-05	0.00204738
GTF3C1: general transcription factor IIIC, polypeptide 1, alpha 220kDa	ENSGALG00000007387	20.5973	43.6935	1.08496	6.36112e-10	7.81313e-08
GTPBP4: GTP binding protein 4	ENSGALG00000006703	75.6587	219.397	1.53597	0.00216024	0.0310237
GUCY1A3: guanylate cyclase 1, soluble, alpha 3	ENSGALG00000009354	2.06173	7.95741	1.94844	0.000123912	0.00336247
GUCY1B3: guanylate cyclase 1, soluble, beta 3	ENSGALG00000009361	2.54905	8.8552	1.79657	0.00308626	0.0392074
GXYLT1: glucoside xylosyltransferase 1	ENSGALG00000009532	9.77242	38.3216	1.97137	7.56991e-09	7.48555e-07
HACE1: HECT domain and ankyrin repeat containing, E3 ubiquitin protein ligase 1	ENSGALG00000015415	10.0663	26.671	1.40573	9.65758e-07	5.48367e-05
HACL1: 2-hydroxyacyl-CoA lyase 1	ENSGALG00000011211	2.66075	11.2094	2.07481	0.00142126	0.0227645
HAS2: hyaluronan synthase 2	ENSGALG00000016394	15.3354	48.5556	1.66277	0.000790094	0.0145447
HAT1: histone acetyltransferase 1	ENSGALG00000009525	40.5593	91.5318	1.17424	1.07479e-06	6.04413e-05
HAUS6: HAUS augmin-like complex, subunit 6	ENSGALG00000015091	17.8047	53.4539	1.58604	0.00264198	0.0354956
HCCS: holocytochrome c synthase	ENSGALG00000005571	11.9793	29.4354	1.29702	0.000111411	0.00307646
HCFC2: host cell factor C2	ENSGALG00000012718	9.32601	19.3053	1.04966	1.47394e-06	7.94394e-05
HDAC11: histone deacetylase 11	ENSGALG00000005092	2.57737	6.84637	1.40944	0.000566123	0.011292
HDAC2: histone deacetylase 2	ENSGALG00000014991	43.1934	133.051	1.62309	0.00244425	0.0336442
HECTD1: HECT domain containing E3 ubiquitin protein ligase 1	ENSGALG00000009946	31.6966	65.8468	1.05479	0	0
HELLS: helicase, lymphoid-specific	ENSGALG00000005451	51.202	222.041	2.11655	5.44997e-11	8.71137e-09
HELQ: helicase, POLQ-like	ENSGALG00000011208	3.07672	6.62147	1.10576	0.00112733	0.0193444
HEMK1: HemK methyltransferase family member 1	ENSGALG00000002253	8.72624	20.2426	1.21396	0.00380091	0.0450263
HERC4: HECT and RLD domain containing E3 ubiquitin protein ligase 4	ENSGALG00000003861	3.5522	13.6391	1.94097	0.00117165	0.019785
HERPUD1: homocysteine-inducible, endoplasmic reticulum stress-inducible, ubiquitin-like domain member 1	ENSGALG00000001220	11.3854	24.3597	1.09731	0.00184703	0.0277732
HEXB: hexosaminidase B (beta polypeptide)	ENSGALG00000014933	8.41697	44.78	2.41148	0.000486064	0.0100173
HIBADH: 3-hydroxyisobutyrate dehydrogenase	ENSGALG00000011100	5.36069	27.0686	2.33613	0.000315338	0.00717506
HisRS: histidyl-tRNA synthetase	ENSGALG00000000794	34.9335	99.5684	1.51108	0.00143945	0.022977
HKDC1: hexokinase domain containing 1	ENSGALG00000021039	1.11793	6.42858	2.52367	0.000591318	0.0116596
HM14A: non-histone chromosomal protein HMG-14A	ENSGALG00000007131	43.3128	145.558	1.74872	0.000507	0.0103788
HMGB1: high mobility group box 1	ENSGALG00000017082	136.935	289.985	1.08248	0.000197588	0.00492116
HMGCS1: 3-hydroxy-3-methylglutaryl-CoA synthase 1 (soluble)	ENSGALG00000014862	29.4775	96.7613	1.71482	4.0141e-08	3.3576e-06
Hmgn1: high mobility group nucleosomal binding domain 1	ENSGALG00000016067	20.0989	81.8962	2.02668	0.000146357	0.00387248
Hmgn3: high mobility group nucleosomal binding domain 3	ENSGALG00000015880	17.2373	52.3111	1.60158	9.54894e-05	0.00271099
HNRNPA2B1: heterogeneous nuclear ribonucleoprotein A2/B1	ENSGALG00000011036	176.062	473.189	1.42633	0.000747269	0.013996
HNRNPH3: heterogeneous nuclear ribonucleoprotein H3 (2H9)	ENSGALG00000003947	104.187	473.987	2.18567	1.13278e-07	8.37421e-06
HNRNPM: heterogeneous nuclear ribonucleoprotein M	ENSGALG00000000377	96.5582	353.717	1.87313	3.98397e-11	6.50167e-09
HOOK3: hook homolog 3 (Drosophila)	ENSGALG00000015390	25.9358	74.6871	1.52591	0.00301121	0.0385901
HS2ST: Heparan sulfate 2-O-sulfotransferase 1	ENSGALG00000006255	14.3313	42.2731	1.56057	0.00238287	0.0330023
HSD17B4: hydroxysteroid (17-beta) dehydrogenase 4	ENSGALG00000002187	15.2028	44.8662	1.56129	0.00134963	0.0219487
HSPA14: heat shock 70kDa protein 14	ENSGALG00000006643	16.9778	53.8125	1.66429	1.20418e-08	1.13773e-06
HSPA9B : heat shock 70kDa protein 9B	ENSGALG00000002363	53.1665	153.144	1.5263	0.00391407	0.0458777
HSPH1: heat shock 105kDa/110kDa protein 1	ENSGALG00000017077	35.8113	93.9736	1.39184	3.66605e-05	0.00126373
HTRA1: HtrA serine peptidase 1	ENSGALG00000009546	8.99369	22.9313	1.35034	9.21796e-05	0.00262661
Hypothetical protein LOC419429	ENSGALG00000002005	0.925162	8.02019	3.11586	1.79476e-05	0.000699238
hypothetical protein LOC426890	ENSGALG00000002419	2.81273	7.58074	1.43037	0.00222277	0.0315145
IARS: isoleucyl-tRNA synthetase	ENSGALG00000004813	31.2633	93.2522	1.57667	0.00234565	0.0326808
IARS: isoleucyl-tRNA synthetase	ENSGALG00000002037	5.85311	17.4627	1.577	1.76832e-05	0.000693569
ID2: inhibitor of DNA binding 2, dominant negative helix-loop-helix protein	ENSGALG00000016403	126.222	695.947	2.46302	4.11577e-06	0.000192485
ID4: inhibitor of DNA binding 4, dominant negative helix-loop-helix protein	ENSGALG00000012682	11.0555	45.1423	2.02972	0.00161849	0.0251973
IDE: insulin-degrading enzyme	ENSGALG00000006865	54.2852	110.943	1.03119	6.77902e-13	1.61431e-10
IDH3A: isocitrate dehydrogenase 3 (NAD+) alpha	ENSGALG00000003303	17.6681	72.9126	2.04502	3.02878e-11	5.15931e-09
IDI1: isopentenyl-diphosphate delta isomerase 1	ENSGALG00000006723	44.0405	112.236	1.34963	8.94496e-05	0.00256133
IFRD1: interferon-related developmental regulator 1	ENSGALG00000009448	17.5198	55.8814	1.67338	0.00269958	0.0360001
IGSF11: immunoglobulin superfamily, member 11	ENSGALG00000015084	0.946772	6.42853	2.7634	0.000133728	0.00359956
IL1RAP: interleukin 1 receptor accessory protein	ENSGALG00000007253	17.0131	68.518	2.00984	7.10543e-05	0.00213961
IL28RA: interleukin 28 receptor, alpha	ENSGALG00000004231	6.78271	17.2886	1.34989	0.000847578	0.0153271
IMPACT: impact RWD domain protein	ENSGALG00000015093	13.0676	27.371	1.06666	0.00075785	0.0141601
INADL: InaD-like (Drosophila)	ENSGALG00000010934	6.18006	14.3764	1.21801	0.00202662	0.0297312
INSIG1: insulin induced gene 1	ENSGALG00000017394	21.0602	113.577	2.43107	3.8471e-06	0.000180644
INTS4: integrator complex subunit 4	ENSGALG00000000091	5.76568	15.7644	1.45111	3.39184e-11	5.69463e-09
IP6K2: inositol hexakisphosphate kinase 2	ENSGALG00000005701	8.52268	31.9442	1.90618	0.00208882	0.0303897
IPCEF1: interaction protein for cytohesin exchange factors 1	ENSGALG00000013625	11.4333	70.961	2.63378	5.92744e-07	3.63931e-05
IPO11: importin 11	ENSGALG00000014740	27.8968	80.5961	1.53061	0.000710456	0.013425
IPO5: importin 5	ENSGALG00000016887	118.294	307.054	1.37612	0.00327222	0.0405543
IPO8: importin 8	ENSGALG00000012953	15.7701	43.9396	1.47833	0.00292224	0.0378028
IQSEC3: IQ motif and Sec7 domain 3	ENSGALG00000012975	3.96156	18.4608	2.22033	1.70894e-08	1.5339e-06
IREB2: iron-responsive element binding protein 2	ENSGALG00000003171	23.05	62.2569	1.43346	1.34974e-11	2.54024e-09
IST1: increased sodium tolerance 1 homolog (yeast)	ENSGALG00000000811	21.5602	44.5687	1.04766	0.000668263	0.0128356
ISY1-RAB43: ISY1-RAB43 readthrough	ENSGALG00000005012	21.2564	78.2242	1.87972	3.56878e-05	0.00124382
ITFG2: integrin alpha FG-GAP repeat containing 2	ENSGALG00000014335	35.8907	93.5165	1.38161	0.00204988	0.029955
ITGA4: integrin, alpha 4 (antigen CD49D, alpha 4 subunit of VLA-4 receptor)	ENSGALG00000008978	10.495	77.5392	2.88523	7.59264e-08	5.8286e-06
ITGB3: integrin, beta 3 (platelet glycoprotein IIIa, antigen CD61)	ENSGALG00000000379	14.627	124.62	3.09083	2.95366e-09	3.19119e-07
ITPKA: inositol-trisphosphate 3-kinase A	ENSGALG00000008603	14.0093	42.778	1.61048	0.000474828	0.0098586
IWS1: IWS1 homolog (S. cerevisiae)	ENSGALG00000001803	32.5711	80.6457	1.308	6.3191e-08	4.91563e-06
JAK2:Janus kinase 2	ENSGALG00000015027	3.50147	8.35646	1.25493	0.00249217	0.0340713
JHDM1D: jumonji C domain containing histone demethylase 1 homolog D (S. cerevisiae)	ENSGALG00000012848	21.5132	49.7689	1.21002	1.25235e-05	0.000514545
JMJD6: jumonji domain containing 6	ENSGALG00000001802	16.5943	45.6509	1.45995	0.000809302	0.0147816
KAL1: Kallmann syndrome 1 sequence	ENSGALG00000016616	8.02975	59.5543	2.89078	0	0
KANSL3: KAT8 regulatory NSL complex subunit 3	ENSGALG00000014540	16.6878	33.7033	1.01409	3.70823e-06	0.00017625
KBTBD8: kelch repeat and BTB (POZ) domain containing 8	ENSGALG00000007569	8.285	20.1232	1.28029	0.00129009	0.0211692
KCTD1: potassium channel tetramerisation domain containing 1	ENSGALG00000015124	11.298	49.598	2.13421	8.01238e-05	0.00235864
KCTD10: potassium channel tetramerisation domain containing 10	ENSGALG00000005138	11.8427	32.9563	1.47655	0.000283009	0.00661259
KCTD15: potassium channel tetramerisation domain containing 15	ENSGALG00000004907	9.02182	86.2947	3.25778	2.82029e-08	2.42867e-06
KCTD9: potassium channel tetramerisation domain containing 9	ENSGALG00000000275	9.36236	26.7614	1.51521	0.00353193	0.0426416
KDELR3: KDEL (Lys-Asp-Glu-Leu) endoplasmic reticulum protein retention receptor 3	ENSGALG00000012251	39.7543	83.434	1.06952	0.000404962	0.00877492
KDM3B: lysine (K)-specific demethylase 3B	ENSGALG00000007663	22.7564	45.742	1.00725	0.000405392	0.0087761
KHDRBS3: KH domain containing, RNA binding, signal transduction associated 3	ENSGALG00000016203	17.1362	53.9663	1.65501	1.23407e-07	8.97179e-06
KIAA0020: KIAA0020	ENSGALG00000010178	81.336	213.974	1.39547	0.00401161	0.046716
KIAA0825: KIAA0825	ENSGALG00000014664	7.0075	18.5483	1.40431	0.000540102	0.0109508
KIAA1147: KIAA1147	ENSGALG00000012874	6.00263	15.9225	1.4074	0.00392084	0.0459341
KIAA1432: KIAA1432	ENSGALG00000015036	10.2279	32.4457	1.66552	0.000810749	0.0147816
KIAA1715	ENSGALG00000009283	8.92581	32.8835	1.88131	1.47653e-08	1.33558e-06
KIAA1737: KIAA1737	ENSGALG00000010390	5.32707	12.1418	1.18857	0.000688089	0.0131097
KIF20A: kinesin family member 20A	ENSGALG00000003231	18.2243	41.0379	1.1711	0.00273443	0.0362216
KIF2C: kinesin family member 2C	ENSGALG00000010120	28.5686	65.0913	1.18803	0.000350851	0.00780535
KLHL15: kelch-like 15 (Drosophila)	ENSGALG00000016345	8.40966	16.9241	1.00896	0.00339489	0.0413716
KLHL2: kelch-like 2, Mayven (Drosophila)	ENSGALG00000009554	10.8618	60.4294	2.47598	1.12337e-08	1.06569e-06
KLHL28: kelch-like 28	ENSGALG00000012489	3.22228	8.72272	1.4367	0.000132975	0.00358342
KLHL7: kelch-like 7	ENSGALG00000010938	12.3124	34.4735	1.48538	0.00265261	0.0355974
KPNA5: karyopherin alpha 5	ENSGALG00000014937	6.91845	22.2582	1.68582	0.00150238	0.0237864
KRAS: v-Ki-ras2 Kirsten rat sarcoma viral oncogene homolog	ENSGALG00000014033	15.3873	49.3928	1.68256	0.00105189	0.0183605
LAMB4: laminin, beta 4	ENSGALG00000007917	7.62205	28.2063	1.88777	0.00011361	0.00312655
LAMC1: laminin, gamma 1 (formerly LAMB2)	ENSGALG00000004620	45.5138	99.3361	1.12601	1.12214e-05	0.000464315
LANCL3: LanC lantibiotic synthetase component C-like 3 (bacterial)	ENSGALG00000016265	9.70668	23.0523	1.24786	0.000704009	0.0133196
LARS: leucyl-tRNA synthetase	ENSGALG00000007494	18.148	53.7494	1.56644	0.00357696	0.042918
LAS1L: LAS1-like (S. cerevisiae)	ENSGALG00000004713	36.6705	97.1156	1.40508	1.30834e-08	1.21644e-06
LBH: limb bud and heart development	ENSGALG00000009052	11.5612	49.7521	2.10546	0.000350026	0.00779443
LECT1: leukocyte cell derived chemotaxin 1	ENSGALG00000016945	27.266	72.6432	1.41372	0.00418051	0.0479178
LFNG: Beta-1,3-N-acetylglucosaminyltransferase lunatic fringe	ENSGALG00000004284	2.44561	7.38555	1.59451	0.00221715	0.0314539
LGALS3: lectin, galactoside-binding, soluble, 3	ENSGALG00000012173	9.1612	54.4277	2.57073	7.44215e-06	0.000325849
LHX9: LIM homeobox 9	ENSGALG00000002223	5.60644	21.093	1.91161	1.43979e-09	1.68002e-07
LIFR: leukemia inhibitory factor receptor	ENSGALG00000003733	19.0187	72.0526	1.92163	0	0
LIG1: ligase I, DNA, ATP-dependent	ENSGALG00000001350	12.8506	29.4885	1.19832	1.71231e-06	8.93966e-05
LIG1: ligase I, DNA, ATP-dependent	ENSGALG00000013384	8.01787	18.4011	1.1985	0.000109623	0.00304194
LIMA1: LIM domain and actin binding 1	ENSGALG00000006169	57.286	130.106	1.18343	4.86915e-07	3.03827e-05
LIMCH1: LIM and calponin homology domains 1	ENSGALG00000014258	5.71287	21.187	1.89089	1.33311e-08	1.22967e-06
LIN28:lin-28 homolog	ENSGALG00000000388	16.135	56.6026	1.81068	0.000385869	0.00846338
LIN7C: lin-7 homolog C (C. elegans)	ENSGALG00000012170	8.12839	24.2545	1.57721	6.15925e-08	4.8073e-06
LMBR1: limb region 1 homolog (mouse)	ENSGALG00000006400	13.4358	40.4637	1.59055	0.00277836	0.0365692
LMNB1: lamin B1	ENSGALG00000015120	11.7792	32.9275	1.48305	0.00201509	0.0296745
LMO4: LIM domain only 4	ENSGALG00000006252	77.429	462.632	2.57892	5.69322e-13	1.41343e-10
LNPEP: leucyl/cystinyl aminopeptidase	ENSGALG00000015301	11.242	29.2398	1.37904	6.76081e-05	0.00208186
LONRF1: LON peptidase N-terminal domain and ring finger 1	ENSGALG00000013725	3.09393	10.4563	1.75686	0.00039845	0.00866601
LRP6: low density lipoprotein receptor-related protein 6	ENSGALG00000011558	15.1075	36.9018	1.28842	1.53906e-05	0.000612917
LRPPRC: leucine-rich pentatricopeptide repeat containing	ENSGALG00000009967	153.201	337.254	1.13841	0.000381775	0.00839724
LRRC28: leucine rich repeat containing 28	ENSGALG00000007057	14.1187	39.2778	1.4761	0.000154524	0.00403823
LSAMP: limbic system-associated membrane protein	ENSGALG00000015087	40.4326	145.951	1.85189	4.20469e-07	2.65921e-05
LSG1: large subunit GTPase 1 homolog (S. cerevisiae)	ENSGALG00000007058	22.0025	70.1144	1.67205	0.000392967	0.00857071
LSM14A: LSM14 homolog A	ENSGALG00000004935	22.2006	52.7108	1.2475	0.00409326	0.0471807
LSM7 homolog, U6 small nuclear RNA associated	ENSGALG00000000408	1.29545	14.9827	3.53178	4.5289e-05	0.00149916
LTK: leukocyte receptor tyrosine kinase	ENSGALG00000008615	37.1579	268.551	2.85345	0	0
LTN1: E3 ubiquitin-protein ligase listerin	ENSGALG00000015804	10.6838	22.9884	1.10548	1.66533e-14	5.32382e-12
LTV1: LTV1 homolog (S. cerevisiae)	ENSGALG00000013765	15.3583	68.0977	2.14859	0.00017665	0.00449073
LUC7L2: LUC7-like 2 (S. cerevisiae)	ENSGALG00000011857	31.0755	69.0233	1.15131	0.000802666	0.0147147
LYPLA2: lysophospholipase II	ENSGALG00000004002	9.01283	26.7369	1.56878	0.000646036	0.0125013
LYSMD3: LysM, putative peptidoglycan-binding, domain containing 3	ENSGALG00000014651	3.02452	10.8063	1.8371	0.00307486	0.0391906
MAD2L1BP: MAD2L1 binding protein	ENSGALG00000010305	5.01328	18.6993	1.89915	0.00342999	0.0416471
MAK16: MAK16 homolog (S. cerevisiae)	ENSGALG00000004338	12.216	38.0513	1.63918	2.59941e-09	2.86144e-07
MALT1: mucosa associated lymphoid tissue lymphoma translocation gene 1	ENSGALG00000002872	10.303	25.1184	1.28568	0.0027706	0.036509
MAP2K5: mitogen-activated protein kinase kinase 5	ENSGALG00000007930	8.3989	30.0783	1.84045	0.000340218	0.00760505
MAP3K2: mitogen-activated protein kinase kinase kinase 2	ENSGALG00000011502	9.5241	21.9461	1.20431	1.07482e-06	6.04413e-05
MAP3K3: mitogen-activated protein kinase kinase kinase 3-like	ENSGALG00000005884	2.32508	8.33835	1.84248	0.00117815	0.0198087
MAP3K4: mitogen-activated protein kinase kinase kinase 4	ENSGALG00000020003	16.0431	43.5782	1.44165	5.94154e-07	3.63931e-05
MAP3K5: mitogen-activated protein kinase kinase kinase 5	ENSGALG00000013892	11.1796	70.8846	2.66461	3.17568e-12	6.67666e-10
MAPK1: mitogen-activated protein kinase 1	ENSGALG00000001501	25.3842	54.2144	1.09475	0.000305459	0.00703007
MAPK1IP1L: mitogen-activated protein kinase 1 interacting protein 1-like	ENSGALG00000012175	20.544	64.9678	1.66101	0.00173686	0.0264749
MAPRE1: microtubule-associated protein, RP/EB family, member 1	ENSGALG00000006657	56.1072	159.804	1.51004	3.97679e-05	0.00134697
MARCH5: membrane-associated ring finger (C3HC4) 5	ENSGALG00000006884	9.8739	37.0919	1.90941	2.24108e-06	0.000112481
MARK1: MAP/microtubule affinity-regulating kinase 1	ENSGALG00000009483	28.0457	70.5205	1.33026	2.01019e-06	0.000102652
MASTL: serine/threonine-protein kinase greatwall	ENSGALG00000007507	8.87585	23.5174	1.40577	5.56887e-10	6.98714e-08
MAT2B: methionine adenosyltransferase II, beta	ENSGALG00000001750	3.92987	13.9882	1.83166	1.34105e-05	0.000547134
MATN4: matrilin 4	ENSGALG00000004028	1.81365	12.2516	2.756	8.1237e-05	0.00238284
MBTD: mbt domain containing 1	ENSGALG00000002954	49.6253	102.015	1.03964	0.00142625	0.0228132
MCF2: MCF.2 cell line derived transforming sequence	ENSGALG00000006562	5.20267	15.5724	1.58167	4.44078e-07	2.7784e-05
MCFD2: multiple coagulation factor deficiency 2	ENSGALG00000010017	21.9474	163.588	2.89795	2.31108e-07	1.57241e-05
MCM10: minichromosome maintenance complex component 10	ENSGALG00000005870	14.6738	42.131	1.52164	4.83272e-08	3.92966e-06
MCMBP: minichromosome maintenance complex binding protein	ENSGALG00000009455	23.3865	62.7493	1.42392	0.00237765	0.0329603
MDGA2: MAM domain containing glycosylphosphatidylinositol anchor 2	ENSGALG00000012228	6.3425	14.1919	1.16194	0.00317944	0.03986
MDM2: Mdm2, p53 E3 ubiquitin protein ligase homolog (mouse)	ENSGALG00000009942	5.0354	17.0048	1.75576	0.00254365	0.034613
MED21: mediator complex subunit 21	ENSGALG00000014088	3.17129	11.775	1.89258	0.00422699	0.0481666
MED7: mediator complex subunit 7	ENSGALG00000003870	2.09631	16.7935	3.00198	0.00133203	0.0217534
MEGF9: multiple EGF-like-domains 9	ENSGALG00000023838	8.06893	59.3397	2.87855	1.48245e-06	7.9714e-05
MESDC2: mesoderm development candidate 2	ENSGALG00000006403	11.4661	36.2476	1.66051	0.00115188	0.0196312
MET16: Methyltransferase-like protein 16	ENSGALG00000014901	8.90157	24.2106	1.44351	2.15005e-09	2.42395e-07
METAP2: methionyl aminopeptidase 2	ENSGALG00000011377	34.5148	160.005	2.21283	3.28891e-05	0.00117002
METTL19: methyltransferase like 19	ENSGALG00000015594	1.79598	7.49171	2.06053	1.36394e-07	9.7939e-06
METTL8: methyltransferase like 8	ENSGALG00000009564	7.4264	27.5806	1.89292	0.00182648	0.0274997
MFSD2A: major facilitator superfamily domain containing 2A	ENSGALG00000003879	7.93892	23.9857	1.59516	0.00111393	0.0192134
MFSD9: major facilitator superfamily domain containing 9	ENSGALG00000016792	1.62088	5.98447	1.88445	1.79127e-05	0.000699238
MIA3: melanoma inhibitory activity family, member	ENSGALG00000009434	50.3421	110.319	1.13185	0.00332402	0.0408973
MIB1: mindbomb E3 ubiquitin protein ligase 1	ENSGALG00000014974	16.0143	61.6137	1.94389	0.000277876	0.00653708
MICALL1: MICAL-like 1	ENSGALG00000012265	8.49966	27.6656	1.70262	0.000188409	0.00472899
MIOS: missing oocyte, meiosis regulator, homolog (Drosophila)	ENSGALG00000010699	5.5372	19.0265	1.78078	0.00039978	0.00868684
MKRN2: makorin ring finger protein 2	ENSGALG00000004991	5.23883	17.4566	1.73646	0.00047341	0.00984668
MLF1IP: MLF1 interacting protein	ENSGALG00000020210	4.76491	18.4686	1.95455	6.95637e-05	0.00210832
MLH3: mutL homolog 3 (E. coli)	ENSGALG00000010304	9.32848	19.8304	1.088	0.000548556	0.0110837
MLXIP: MLX interacting protein	ENSGALG00000004397	19.8716	42.4138	1.09382	2.01686e-05	0.00077669
MMP17: matrix metallopeptidase 17 (membrane-inserted)	ENSGALG00000002461	3.37197	8.64695	1.3586	0.00446054	0.0499162
MOBKL3: preimplantation protein 3	ENSGALG00000008128	17.9955	39.3516	1.12879	0.00397584	0.0464153
MORC2: MORC family CW-type zinc finger 2	ENSGALG00000007512	13.5238	35.2805	1.38337	0.00212858	0.0307393
MORC3: MORC family CW-type zinc finger 3	ENSGALG00000016040	19.1567	41.5534	1.11712	0.00203393	0.0297778
MORF4L1: mortality factor 4 like 1 isoform 1	ENSGALG00000008146	25.1593	65.5258	1.38097	0.00162466	0.0252427
MOSPD1: motile sperm domain containing 1	ENSGALG00000006132	12.4991	29.0798	1.2182	0.000267887	0.00633576
MOSPD2: motile sperm domain containing 2	ENSGALG00000016568	6.91278	21.6175	1.64486	1.35717e-05	0.000552744
MOXD1: monooxygenase, DBH-like 1	ENSGALG00000002911	36.5564	130.973	1.84107	1.05617e-09	1.25116e-07
MPLKIP: M-phase specific PLK1 interacting protein	ENSGALG00000023024	12.4663	40.3467	1.69442	0.00127078	0.0209289
MRC2: mannose receptor, C type 2	ENSGALG00000000461	6.14841	15.4771	1.33185	1.79859e-06	9.2693e-05
MRPL15: mitochondrial ribosomal protein L15	ENSGALG00000015280	30.1124	65.1788	1.11404	0.00111341	0.0192134
MRPL3: mitochondrial ribosomal protein L3	ENSGALG00000011603	20.4001	59.7572	1.55054	0.00279467	0.0367225
MRPL53: mitochondrial ribosomal protein L53	ENSGALG00000015761	6.50232	25.497	1.9713	0.001514	0.0239378
MTA3: metastasis associated 1 family, member 3	ENSGALG00000009925	8.76599	20.6894	1.2389	6.18838e-12	1.23434e-09
MTBP: Mdm2, transformed 3T3 cell double minute 2, p53 binding protein (mouse) binding protein, 104kDa	ENSGALG00000016404	16.3189	33.2067	1.02493	0.00047245	0.00984668
MTF2: metal response element binding transcription factor 2	ENSGALG00000005911	24.6051	61.0415	1.31083	0.00281816	0.0369648
MTFMT: mitochondrial methionyl-tRNA formyltransferase	ENSGALG00000007353	18.7629	38.6743	1.04349	0.00411051	0.0473013
MTHFD2: methylenetetrahydrofolate dehydrogenase (NADP+ dependent) 2, methenyltetrahydrofolate cyclohydrolase	ENSGALG00000013480	8.27331	16.8633	1.02735	3.59901e-08	3.04312e-06
MTIF2: mitochondrial translational initiation factor 2	ENSGALG00000008117	17.553	52.2478	1.57365	0.00283167	0.0370627
MTMR10: myotubularin related protein 10	ENSGALG00000003883	17.7642	36.5182	1.03965	6.3898e-06	0.000284036
MTMR8: myotubularin related protein 8	ENSGALG00000007590	7.3169	21.1358	1.53038	2.90167e-08	2.48957e-06
MTPN: myotrophin	ENSGALG00000012895	17.0214	108.493	2.67218	6.27678e-07	3.80471e-05
MTR: 5-methyltetrahydrofolate-homocysteine methyltransferase	ENSGALG00000014464	5.27673	12.6165	1.25759	0.0033812	0.0413126
MTRF1L: mitochondrial translational release factor 1-like	ENSGALG00000013609	7.10064	14.4559	1.02563	1.58338e-05	0.000627359
MYBBP1A: MYB binding protein (P160) 1a	ENSGALG00000001363	28.0216	73.8828	1.3987	0.00192334	0.0285528
MYBL2: myeloblastosis oncogene-like 2	ENSGALG00000003503	20.0782	42.8054	1.09216	0.00113678	0.0194636
MYC: v-myc myelocytomatosis viral oncogene homolog (avian)	ENSGALG00000016308	18.2773	60.7572	1.733	0.000688152	0.0131097
MYCN: v-myc myelocytomatosis viral related oncogene, neuroblastoma derived (avian)	ENSGALG00000016462	9.5967	23.2603	1.27726	0.00416103	0.0477414
MYEF2: myelin expression factor 2	ENSGALG00000004905	12.9595	49.9637	1.94687	1.64487e-07	1.15971e-05
MYLIP: myosin regulatory light chain interacting protein	ENSGALG00000012704	8.46438	36.9213	2.12498	8.79741e-13	2.07379e-10
MYLK: myosin light chain kinase	ENSGALG00000011708	62.9344	133.105	1.08064	6.66134e-16	2.63484e-13
MYO10: myosin X	ENSGALG00000012954	18.3835	64.8008	1.8176	0	0
MYO19: myosin XIX	ENSGALG00000005374	18.1737	36.7556	1.01611	0.000357478	0.0079301
MYO6: myosin VI	ENSGALG00000015898	5.92302	19.857	1.74524	2.09171e-07	1.43995e-05
MYSM1: myb-like, SWIRM and MPN domains 1	ENSGALG00000010869	11.889	24.717	1.05588	0.000364593	0.00806493
N-syndecan: syndecan 3	ENSGALG00000000569	15.7172	42.6326	1.43961	0.00352518	0.0426034
N4BP1: NEDD4 binding protein 1	ENSGALG00000003907	27.8213	71.8993	1.36979	1.52145e-11	2.84049e-09
NAA16: N(alpha)-acetyltransferase 16, NatA auxiliary subunit	ENSGALG00000016953	17.5438	40.1791	1.19548	1.96546e-06	0.000100587
NAA25: N(alpha)-acetyltransferase 25, NatB auxiliary subunit	ENSGALG00000004780	34.5607	75.0649	1.11901	0.000644798	0.0124877
NADK: NAD kinase	ENSGALG00000001359	6.36201	13.748	1.11167	3.89195e-07	2.48839e-05
NADKD1: NAD kinase domain containing 1	ENSGALG00000003558	6.82815	19.1736	1.48955	0.000218964	0.00533399
NAE1: NEDD8-activating enzyme E1 regulatory subunit	ENSGALG00000005211	13.1923	33.1311	1.32849	1.81807e-05	0.000705962
NAMPT: nicotinamide phosphoribosyltransferase	ENSGALG00000008098	12.0475	40.1975	1.73838	0.00168312	0.0259655
NARS: asparaginyl-tRNA synthetase	ENSGALG00000003087	11.923	51.9778	2.12415	1.9164e-11	3.4669e-09
NAT10: N-acetyltransferase 10 (GCN5-related)	ENSGALG00000014573	45.8039	110.748	1.27374	0	0
NAT9: N-acetyltransferase 9	ENSGALG00000007723	14.2091	29.9316	1.07485	0.000355324	0.00788981
NCKIPSD: NCK interacting protein with SH3 domain	ENSGALG00000005713	5.03299	21.5565	2.09863	3.81084e-11	6.30735e-09
NCLN: nicalin	ENSGALG00000013369	12.3357	27.4778	1.15543	0.00137915	0.0223353
NCOA4: nuclear receptor coactivator 4	ENSGALG00000002066	27.2596	68.1777	1.32253	0.000447524	0.00946002
NDST2: N-deacetylase/N-sulfotransferase (heparan glucosaminyl) 2	ENSGALG00000005107	17.8079	48.4353	1.44355	1.49249e-06	7.98859e-05
NDST3: N-deacetylase/N-sulfotransferase (heparan glucosaminyl) 3	ENSGALG00000012010	5.6088	14.8063	1.40045	7.00808e-05	0.00211575
NDUFAF1: NADH dehydrogenase (ubiquinone) 1 alpha subcomplex, assembly factor 1	ENSGALG00000008587	57.6844	182.924	1.66499	0.00153388	0.0241703
NDUFAF4: NADH dehydrogenase (ubiquinone) 1 alpha subcomplex, assembly factor 4	ENSGALG00000019921	10.9763	44.6804	2.02525	0.00331981	0.0408973
NENF: neudesin neurotrophic factor	ENSGALG00000009821	7.71127	26.4509	1.77828	0.00209294	0.0303979
NET1: neuroepithelial cell transforming 1	ENSGALG00000008437	9.68423	21.1114	1.12431	0.0018077	0.0272861
NF2: neurofibromin 2 (merlin)	ENSGALG00000008073	18.4059	52.6836	1.51719	7.75784e-11	1.1833e-08
NFIA: nuclear factor I/A	ENSGALG00000010924	2.80735	16.2659	2.53456	1.81166e-05	0.000704644
NFKB1: nuclear factor of kappa light polypeptide gene enhancer in B-cells 1	ENSGALG00000012304	21.0409	58.4687	1.47447	6.96999e-07	4.17074e-05
NFS1: NFS1 nitrogen fixation 1 homolog (S. cerevisiae)	ENSGALG00000001568	12.8811	73.6343	2.51512	1.35913e-10	1.94843e-08
NFXL1: nuclear transcription factor, X-box binding-like 1	ENSGALG00000014138	10.6121	27.4617	1.3717	0.000167021	0.00429743
NFYB: nuclear transcription factor Y, beta	ENSGALG00000012717	8.01294	44.9404	2.48761	2.01432e-07	1.3949e-05
NGLY1: N-glycanase 1	ENSGALG00000011304	6.61295	21.5013	1.70106	0.00259224	0.0349683
NHLH1: nescient helix loop helix 1	ENSGALG00000024121	1.77675	36.491	4.36023	0.00332772	0.0409072
NIPAL3: NIPA-like domain containing 3	ENSGALG00000004268	15.4964	33.8457	1.12704	0.000655531	0.0126222
NIT2: nitrilase family, member 2	ENSGALG00000015275	2.7222	9.30455	1.77316	0.0029088	0.0376708
NKRF: NFKB repressing factor	ENSGALG00000008645	10.4388	37.702	1.85268	0.000613597	0.0120178
NMD3: NMD3 homolog (S. cerevisiae)	ENSGALG00000009533	7.74758	26.1704	1.75612	0.00185356	0.0278535
NMT2: N-myristoyltransferase 2	ENSGALG00000008791	5.38944	12.4806	1.21148	0.00336009	0.0411624
NOE1: Noelin	ENSGALG00000002515	34.0528	122.614	1.84827	8.84326e-11	1.33145e-08
NOL6: nucleolar protein family 6 (RNA-associated)	ENSGALG00000014168	30.9947	132.332	2.09407	2.41159e-08	2.10784e-06
NOM1: nucleolar protein with MIF4G domain 1	ENSGALG00000006437	5.38111	16.1669	1.58707	2.79908e-06	0.000137232
NONO: non-POU domain containing, octamer-binding	ENSGALG00000005507	50.7302	132.478	1.38484	0.00305825	0.0390857
NOP2: NOP2 nucleolar protein homolog	ENSGALG00000014445	66.3097	228.656	1.78589	0.000111629	0.00307646
NPC1: Niemann-Pick disease, type C1	ENSGALG00000015030	11.6407	28.2751	1.28035	0.00082389	0.0149829
NPM3: nucleophosmin/nucleoplasmin 3	ENSGALG00000007704	54.0852	125.635	1.21593	6.29003e-05	0.00196244
NR1D2: nuclear receptor subfamily 1, group D, member 2	ENSGALG00000011291	5.72912	25.1214	2.13253	1.9311e-05	0.000744893
NR3C2: nuclear receptor subfamily 3, group C, member 2	ENSGALG00000010035	8.40672	26.4449	1.65337	7.95884e-06	0.000343954
NR6A1: nuclear receptor subfamily 6, group A, member 1	ENSGALG00000001073	39.4656	86.5534	1.13299	0.00127669	0.0209966
NRD1: nardilysin (N-arginine dibasic convertase)	ENSGALG00000010565	46.7037	117.945	1.3365	6.88338e-15	2.39757e-12
NRP2: neuropilin 2	ENSGALG00000008621	43.5901	138.266	1.66538	0	0
NRXN1: neurexin 1	ENSGALG00000009107	7.18752	15.6148	1.11935	0.00204438	0.0298933
NSMAF: neutral sphingomyelinase (N-SMase) activation associated factor	ENSGALG00000015444	12.2529	33.5894	1.45488	5.2417e-06	0.000238451
NUB1: negative regulator of ubiquitin-like proteins 1	ENSGALG00000006181	4.71192	9.75777	1.05024	0.000321223	0.00727097
NUBP1: nucleotide binding protein 1	ENSGALG00000007241	48.9299	133.793	1.45121	0.000101166	0.00285135
NUBPL: nucleotide binding protein-like	ENSGALG00000009983	2.5329	9.71905	1.94003	0.00425909	0.0484378
NUDCD1: NudC domain containing 1	ENSGALG00000016106	24.1444	61.8561	1.35722	0.000300088	0.00693965
NUDT7: nudix (nucleoside diphosphate linked moiety X)-type motif 7	ENSGALG00000005709	6.50497	22.397	1.78369	0.000159247	0.0041247
NUFIP1: nuclear fragile X mental retardation protein interacting protein 1	ENSGALG00000016972	26.411	54.3116	1.04012	8.41518e-05	0.00243957
NUP37: nucleoporin 37kDa	ENSGALG00000012759	26.3723	87.9638	1.73789	0.00262158	0.035302
NUPL1: nucleoporin like 1	ENSGALG00000017111	29.067	65.9506	1.18201	8.43393e-05	0.00244197
NVL: nuclear VCP-like	ENSGALG00000009322	53.3241	220.399	2.04726	3.65988e-05	0.00126347
NXN: nucleoredoxin	ENSGALG00000004793	45.1742	103.671	1.19844	0.000412652	0.00890375
OAT: ornithine aminotransferase	ENSGALG00000000054	2.12421	12.3072	2.5345	0.00017515	0.00445744
OAZ3: ornithine decarboxylase antizyme 3	ENSGALG00000002352	32.3995	146.238	2.17427	4.24426e-05	0.00141497
OBFC2A: oligonucleotide/oligosaccharide-binding fold containing 2A	ENSGALG00000007729	17.7972	38.1238	1.09904	0.00429352	0.0486047
OCIAD1: OCIA domain containing 1	ENSGALG00000014081	5.10703	17.4091	1.76929	0.00241184	0.0332851
OGFRL1: opioid growth factor receptor-like 1	ENSGALG00000015951	3.09516	9.02253	1.54352	0.00428369	0.0485981
OLA1: Obg-like ATPase 1	ENSGALG00000009325	58.5784	172.237	1.55596	0.00173538	0.0264697
OLFML2A: olfactomedin-like 2A	ENSGALG00000001048	1.7954	5.62178	1.64672	0.000221177	0.00537108
OPA1: optic atrophy 1 (autosomal dominant)	ENSGALG00000007150	14.3435	29.7212	1.0511	6.23534e-10	7.69916e-08
ORAOV1: oral cancer overexpressed 1	ENSGALG00000007556	19.7026	62.7346	1.67087	2.85692e-06	0.000139481
OSBPL11: oxysterol binding protein-like 11	ENSGALG00000012059	14.4578	31.474	1.12231	0.00419372	0.0480455
OSBPL1A: oxysterol binding protein-like 1A	ENSGALG00000015086	15.1814	33.8652	1.1575	1.47057e-05	0.000593751
OSBPL2: oxysterol binding protein-like 2	ENSGALG00000005195	4.27925	11.519	1.42858	3.86542e-05	0.00131882
OSBPL9: Oxysterol-binding protein	ENSGALG00000010555	15.0253	30.3358	1.01363	3.22067e-10	4.24637e-08
OTOGL: otogelin-like	ENSGALG00000010342	2.35568	29.3094	3.63715	2.75728e-10	3.70775e-08
OTUD6B: OTU domain containing 6B	ENSGALG00000015920	7.45961	38.681	2.37445	2.56489e-05	0.000960784
PACSIN1: protein kinase C and casein kinase substrate in neurons 1	ENSGALG00000002802	0.844994	5.48472	2.6984	7.33205e-05	0.00219369
PAICS: phosphoribosylaminoimidazole carboxylase, phosphoribosylaminoimidazole succinocarboxamide synthetase	ENSGALG00000013726	30.8003	169.645	2.4615	8.61037e-06	0.00036735
PAIP1: poly(A) binding protein interacting protein 1	ENSGALG00000014867	13.732	52.2596	1.92816	8.40772e-05	0.00243957
PALD1: phosphatase domain containing, paladin 1	ENSGALG00000004465	17.3475	52.2805	1.59155	8.72283e-05	0.00250387
PAPD4: PAP associated domain containing 4	ENSGALG00000014810	19.1657	64.0931	1.74164	2.21415e-07	1.5153e-05
PAPD5: PAP associated domain containing 5	ENSGALG00000003853	29.6785	72.6738	1.29202	7.61883e-06	0.0003311
PAPOLA: poly(A) polymerase alpha	ENSGALG00000011103	75.4494	217.209	1.5255	0.00429385	0.0486047
PAPSS1: 3'-phosphoadenosine 5'-phosphosulfate synthase 1	ENSGALG00000010542	7.51458	62.0434	3.04551	0	0
PARG: poly (ADP-ribose) glycohydrolase	ENSGALG00000002117	23.1348	66.0322	1.5131	0.00404204	0.0469299
PARL: presenilin associated, rhomboid-like	ENSGALG00000002315	29.9575	66.3266	1.14667	0.000483729	0.00998989
PARP11: poly (ADP-ribose) polymerase family, member 11	ENSGALG00000014347	2.33177	6.28632	1.43079	0.00195621	0.0289487
PAX3: paired box 3	ENSGALG00000005246	26.7634	95.1454	1.82987	5.02104e-08	4.04055e-06
PBRM1: polybromo 1	ENSGALG00000001590	26.3046	54.2806	1.04512	7.67251e-11	1.17798e-08
PCBP3: poly(rC) binding protein 3	ENSGALG00000004394	15.196	31.6442	1.05825	0.00030034	0.00693965
PCDH18: protocadherin 18	ENSGALG00000009732	16.1252	40.2527	1.31977	0.000576515	0.0114406
PCDH8: protocadherin alpha 8	ENSGALG00000000766	32.3869	109.741	1.76062	0.00102159	0.0178986
PCGF3: polycomb group ring finger 3	ENSGALG00000015333	9.24725	21.4868	1.21636	2.72471e-12	5.81357e-10
PCGF6: polycomb group ring finger 6	ENSGALG00000008230	11.2575	32.5524	1.53188	0.00217416	0.0311661
PCH2_CHICK: Pachytene checkpoint protein 2 homolog	ENSGALG00000012508	20.9139	94.1913	2.17113	6.85948e-05	0.00210354
PCNX: pecanex homolog (Drosophila)	ENSGALG00000000296	13.9197	31.5589	1.18091	0	0
PCOLCE2: procollagen C-endopeptidase enhancer 2	ENSGALG00000002623	20.8006	97.2245	2.2247	7.1916e-06	0.000316661
PCSK1: proprotein convertase subtilisin/kexin type 1	ENSGALG00000014681	1.04878	15.9641	3.92805	2.11806e-07	1.4538e-05
PDCD10: programmed cell death 10	ENSGALG00000009477	5.44472	15.8683	1.54322	0.000254808	0.00605491
PDCD2L: programmed cell death 2-like	ENSGALG00000005010	6.09516	18.2401	1.58138	0.000306427	0.00703847
PDE12: phosphodiesterase 12	ENSGALG00000005620	4.84567	17.1549	1.82385	0.00282862	0.0370627
PDE1C: phosphodiesterase 1C, calmodulin-dependent 70kDa	ENSGALG00000012224	7.07037	25.0068	1.82246	0.00143462	0.0229156
PDE4D: phosphodiesterase 4D, cAMP-specific	ENSGALG00000014727	1.11943	6.06829	2.43852	7.56276e-05	0.00225248
PDE8A: phosphodiesterase 8A	ENSGALG00000005992	7.42	27.3193	1.88043	9.32587e-15	3.10911e-12
PDHX: pyruvate dehydrogenase complex, component X	ENSGALG00000007842	8.20376	16.671	1.02299	0.00187109	0.0280268
PDIA4: protein disulfide isomerase family A, member 4	ENSGALG00000012415	56.0832	161.069	1.52204	3.5812e-05	0.00124382
PDIK1L: PDLIM1 interacting kinase 1 like	ENSGALG00000001463	8.05935	20.4427	1.34285	0.001779	0.0270114
PDLIM5: PDZ and LIM domain 5	ENSGALG00000012211	23.3038	71.3886	1.61513	4.31319e-07	2.71313e-05
PELI2: pellino E3 ubiquitin protein ligase family member 2	ENSGALG00000012124	35.926	74.5052	1.05231	0.00402719	0.046805
PEPD: peptidase D	ENSGALG00000004899	12.7682	41.9811	1.71719	3.57492e-14	1.05605e-11
PES1: pescadillo ribosomal biogenesis factor 1	ENSGALG00000007778	37.9802	101.901	1.42384	0.00136065	0.0220598
PFKFB3: 6-phosphofructo-2-kinase/fructose-2,6-biphosphatase 3	ENSGALG00000006324	8.83616	19.1506	1.11589	2.55973e-06	0.00012656
PGD: phosphogluconate dehydrogenase	ENSGALG00000002797	45.3665	190.531	2.07032	0.000101683	0.002859
PGK1: phosphoglycerate kinase 1	ENSGALG00000007936	110.434	371.359	1.74962	0.001591	0.0248355
PGP: phosphoglycolate phosphatase	ENSGALG00000005888	11.4324	42.7676	1.90339	0.000701374	0.0132857
PHB: prohibitin	ENSGALG00000001162	45.0247	126.96	1.49559	6.24717e-06	0.000279291
PHB2: prohibitin 2	ENSGALG00000014567	158.379	329.395	1.05644	3.17439e-05	0.00114676
PHF14: PHD finger protein 14	ENSGALG00000010714	29.9099	69.7746	1.22208	1.12569e-05	0.000464961
PHGDH: phosphoglycerate dehydrogenase	ENSGALG00000002988	4.75938	20.2325	2.08783	0.00117395	0.0197903
PHLPP2: PH domain and leucine rich repeat protein phosphatase 2	ENSGALG00000000875	4.96526	11.3911	1.19797	0.00298158	0.0383189
PI4K2B: phosphatidylinositol 4-kinase type 2 beta	ENSGALG00000014383	7.51087	16.9347	1.17293	8.2292e-10	9.89922e-08
PIGA: phosphatidylinositol glycan anchor biosynthesis, class A	ENSGALG00000016559	16.7524	54.5143	1.70227	0.00148668	0.0236018
PIK3C2B: phosphatidylinositol-4-phosphate 3-kinase, catalytic subunit type 2 beta	ENSGALG00000000623	19.2945	45.8102	1.24748	5.54638e-07	3.44244e-05
PIK3CA: phosphatidylinositol-4,5-bisphosphate 3-kinase, catalytic subunit alpha	ENSGALG00000008934	20.1468	54.5351	1.43664	2.51243e-08	2.17965e-06
PIK3CB: phosphatidylinositol-4,5-bisphosphate 3-kinase, catalytic subunit beta	ENSGALG00000005505	4.42046	12.5347	1.50365	0.00420843	0.048087
PIP5K1C: phosphatidylinositol-4-phosphate 5-kinase, type I, gamma	ENSGALG00000000784	8.1806	18.6169	1.18633	9.70532e-05	0.00275204
PISD: phosphatidylserine decarboxylase	ENSGALG00000006872	21.4125	65.0106	1.60222	4.92388e-08	3.98988e-06
PITPNB: phosphatidylinositol transfer protein, beta	ENSGALG00000005654	76.676	225.62	1.55705	1.99463e-11	3.55333e-09
PKDCC: protein kinase domain containing, cytoplasmic	ENSGALG00000017393	15.9667	47.4483	1.57129	8.1276e-05	0.00238284
PLA2G12A: phospholipase A2, group XIIA	ENSGALG00000012185	8.83214	29.2282	1.72653	0.00232945	0.0326071
PLA2G4A: phospholipase A2, group IVA (cytosolic, calcium-dependent)	ENSGALG00000005065	3.40466	8.3883	1.30087	0.00118968	0.0199374
PLCL2: phospholipase C-like 2	ENSGALG00000011248	2.64441	6.46616	1.28996	0.00134577	0.021903
PLEKHA1: pleckstrin homology domain containing, family A (phosphoinositide binding specific) member 1	ENSGALG00000009534	5.20588	16.8687	1.69614	0.00055352	0.011155
PLK2: polo-like kinase 2	ENSGALG00000014725	26.0225	96.1658	1.88576	2.24124e-06	0.000112481
PLS3: plastin 3	ENSGALG00000005930	50.9772	151.258	1.56909	0.0020228	0.0297312
PLSCR4: phospholipid scramblase 4	ENSGALG00000006805	4.57458	26.6082	2.54016	0.000521714	0.0106334
PLXNA4: plexin A4	ENSGALG00000006473	6.86458	38.9367	2.50389	1.13598e-12	2.62941e-10
PMM2: phosphomannomutase 2	ENSGALG00000007326	11.921	33.3797	1.48547	0.00318033	0.03986
PNPLA8: patatin-like phospholipase domain containing 8	ENSGALG00000009505	13.2874	37.3473	1.49095	4.80031e-10	6.08831e-08
POFUT1: protein O-fucosyltransferase 1	ENSGALG00000006594	6.41918	16.1841	1.33412	0.00404787	0.0469742
POLB: polymerase (DNA directed), beta	ENSGALG00000003764	11.3587	44.5121	1.9704	2.02588e-09	2.29505e-07
POLK: polymerase (DNA directed) kappa	ENSGALG00000014956	2.53045	7.01189	1.47041	0.00154699	0.0243112
POLR1B: polymerase (RNA) I polypeptide B, 128kDa	ENSGALG00000009930	31.0194	64.4065	1.05404	0.000461397	0.00968311
POLR1B: polymerase (RNA) I polypeptide B, 128kDa	ENSGALG00000008607	12.2786	25.4952	1.05408	0.00218131	0.0311928
POLR3A: polymerase (RNA) III (DNA directed) polypeptide A, 155kDa	ENSGALG00000004947	8.01494	23.0632	1.52483	0.0042097	0.048087
POP1: processing of precursor 1, ribonuclease P/MRP subunit (S. cerevisiae)	ENSGALG00000018800	9.36743	25.7343	1.45797	4.36151e-05	0.00144786
POT1: protection of telomeres 1 homolog (S. pombe)	ENSGALG00000008740	4.78118	16.6474	1.79986	1.42671e-10	2.0302e-08
PP6R3: Serine/threonine-protein phosphatase 6 regulatory subunit 3	ENSGALG00000007037	22.6894	47.6017	1.06899	0.00182088	0.0274508
PPAC: Low molecular weight phosphotyrosine protein phosphatase	ENSGALG00000016363	3.05086	13.5198	2.14779	2.30083e-12	5.11375e-10
PPAT: phosphoribosyl pyrophosphate amidotransferase	ENSGALG00000013728	10.8154	34.0985	1.65662	0.00221645	0.0314539
PPM1A: protein phosphatase, Mg2+/Mn2+ dependent, 1A	ENSGALG00000011917	14.9152	39.5312	1.4062	0.00286687	0.0372933
PPM1B: protein phosphatase, Mg2+/Mn2+ dependent, 1B	ENSGALG00000009970	10.4111	44.48	2.09503	4.31038e-07	2.71313e-05
PPM1L: protein phosphatase 1 (formerly 2C)-like	ENSGALG00000009537	8.82694	24.0444	1.44572	0.00142116	0.0227645
PPP1CB: protein phosphatase 1, catalytic subunit, beta isozyme	ENSGALG00000010026	73.9852	295.25	1.99663	0.000337491	0.00755858
PPP1R2: protein phosphatase 1, regulatory (inhibitor) subunit 2	ENSGALG00000007005	41.6445	124.58	1.58088	0.000167235	0.00429819
PPP1R7: protein phosphatase 1, regulatory subunit 7	ENSGALG00000005832	32.2293	89.8112	1.47852	6.86699e-08	5.30645e-06
PPP2CA: protein phosphatase 2, catalytic subunit, alpha isozyme	ENSGALG00000006462	72.9617	215.746	1.56412	0.00298183	0.0383189
PPP2R2A: protein phosphatase 2, regulatory subunit B, alpha	ENSGALG00000000235	71.5202	240.765	1.7512	1.22148e-08	1.14943e-06
Ppp2r3d: protein phosphatase 2 (formerly 2A), regulatory subunit B'', delta	ENSGALG00000016702	3.56545	18.4741	2.37334	3.22975e-05	0.00115805
Ppp2r5c: protein phosphatase 2, regulatory subunit B (B56), gamma isoform	ENSGALG00000011260	15.681	35.2216	1.16745	0.000738603	0.0138448
PPP3CB: protein phosphatase 3, catalytic subunit, beta isozyme	ENSGALG00000005243	24.0194	75.121	1.64502	4.90505e-11	7.94925e-09
PPWD1: peptidylprolyl isomerase domain and WD repeat containing 1	ENSGALG00000014756	2.76611	10.3303	1.90095	0.00127298	0.0209503
PRDM15: PR domain containing 15	ENSGALG00000019178	15.3837	33.7141	1.13196	0.00251157	0.0342763
PREX1: phosphatidylinositol-3,4,5-trisphosphate-dependent Rac exchange factor 1	ENSGALG00000004621	35.3013	73.9375	1.06658	2.65495e-05	0.000988174
PRKAA1: protein kinase, AMP-activated, alpha 1 catalytic subunit	ENSGALG00000014832	8.47464	24.3775	1.52433	0.00226188	0.031986
PRKACB: protein kinase, cAMP-dependent, catalytic, beta	ENSGALG00000008841	10.6736	26.5797	1.31628	0.000307004	0.0070448
PRKAG2: protein kinase, AMP-activated, gamma 2 non-catalytic subunit	ENSGALG00000006219	16.7119	48.5551	1.53875	0.000445853	0.00943324
PRKAR1A: protein kinase, cAMP-dependent, regulatory, type I, alpha	ENSGALG00000004237	34.3483	123.95	1.85145	0	0
PRKCI: protein kinase C, iota	ENSGALG00000009364	10.5301	23.8415	1.17896	0.00198385	0.0292834
PRKD3: protein kinase D3	ENSGALG00000010612	42.6279	114.977	1.43147	1.58006e-06	8.32367e-05
PRMT3: protein arginine methyltransferase 3	ENSGALG00000003958	11.6399	59.7614	2.36013	1.45381e-05	0.000587998
PRMT8: protein arginine methyltransferase 8	ENSGALG00000013272	2.71837	10.9766	2.01362	0.000806409	0.0147601
PRPF38B: PRP38 pre-mRNA processing factor 38 (yeast) domain containing B	ENSGALG00000001972	20.331	53.2975	1.39038	0.00439603	0.0493854
PRPF4B: PRP4 pre-mRNA processing factor 4 homolog B (yeast)	ENSGALG00000012813	16.5188	44.0553	1.4152	1.3609e-10	1.94843e-08
PRRC2B: proline-rich coiled-coil 2B	ENSGALG00000003776	66.0825	187.32	1.50316	1.22184e-10	1.78213e-08
PSMA2: proteasome (prosome, macropain) subunit, alpha type, 2	ENSGALG00000019598	17.7913	59.1932	1.73426	3.82818e-09	4.07938e-07
PSMD13: proteasome (prosome, macropain) 26S subunit, non-ATPase, 13	ENSGALG00000004219	37.5118	87.6587	1.22455	2.71543e-05	0.000999525
PSMD14: proteasome (prosome, macropain) 26S subunit, non-ATPase, 14	ENSGALG00000011128	37.533	105.33	1.48868	0.00266458	0.035717
PSMD3: proteasome (prosome, macropain) 26S subunit, non-ATPase, 3	ENSGALG00000022293	26.479	56.3279	1.089	0.00082436	0.0149829
PSPC1: paraspeckle component 1	ENSGALG00000017142	47.0147	128.346	1.44886	2.22045e-16	9.09097e-14
PSPH: phosphoserine phosphatase	ENSGALG00000002397	2.96546	20.5929	2.79582	0.00202754	0.0297312
PTCD3: pentatricopeptide repeat domain 3	ENSGALG00000015773	11.4045	25.9491	1.18608	0.000152787	0.00400629
PTCH1: patched 1	ENSGALG00000012620	25.1297	51.5847	1.03755	0.000766129	0.0142805
PTGES2: prostaglandin E synthase 2	ENSGALG00000004779	3.12262	11.7888	1.91658	0.00344843	0.0418057
PTP4A1: protein tyrosine phosphatase type IVA, member 1	ENSGALG00000016271	61.7968	211.768	1.77688	0.00112393	0.0193004
PTPLB: protein-tyrosine phosphatase-like member B	ENSGALG00000011704	11.1627	34.9933	1.64839	0.00102543	0.0179523
PTPN12: protein tyrosine phosphatase, non-receptor type 12	ENSGALG00000008322	44.1552	95.6009	1.11444	7.96464e-05	0.00234982
PTPRJ: protein tyrosine phosphatase, receptor type, J	ENSGALG00000006382	15.8401	41.8031	1.40002	0.000537196	0.0109013
PTTG1IP: pituitary tumor-transforming 1 interacting protein	ENSGALG00000005675	10.6622	36.2228	1.7644	0.00230179	0.0324464
PUM1: pumilio homolog 1 (Drosophila)	ENSGALG00000000597	22.9706	122.909	2.41973	9.59233e-14	2.66495e-11
PUS7: pseudouridylate synthase 7 homolog (S. cerevisiae)	ENSGALG00000008132	15.6972	33.7906	1.10612	3.64585e-05	0.00126236
PWP2: PWP2 periodic tryptophan protein homolog (yeast)	ENSGALG00000022802	9.49113	36.5558	1.94545	3.27978e-11	5.54639e-09
PXDN: peroxidasin homolog (Drosophila)	ENSGALG00000016377	40.379	94.7932	1.23118	0.000307875	0.00705784
Pzp: pregnancy zone protein	ENSGALG00000011926	6.84587	19.1201	1.48178	0.00302843	0.0387683
RAB11FIP5: RAB11 family interacting protein 5 (class I)	ENSGALG00000016092	2.61737	5.5275	1.07851	0.00155335	0.0243783
RAB18: RAB18, member RAS oncogene family	ENSGALG00000007435	16.0604	55.2596	1.78272	0.000985125	0.0173377
RAB30: RAB30, member RAS oncogene family	ENSGALG00000017248	4.18625	9.56333	1.19185	0.000140981	0.00376438
RAB4A: RAB4A, member RAS oncogene family	ENSGALG00000011083	6.69021	34.3199	2.35892	6.17452e-07	3.75247e-05
RABGAP1: RAB GTPase activating protein 1	ENSGALG00000001225	23.8224	50.8895	1.09505	0.000463741	0.00971483
RABGAP1L: RAB GTPase activating protein 1-like	ENSGALG00000004578	4.9058	10.4747	1.09435	0.000226962	0.00548303
RAD23B: RAD23 homolog B (S. cerevisiae)	ENSGALG00000015540	17.7605	58.8943	1.72945	0.000809885	0.0147816
RAF1: RAF proto-oncogene serine/threonine-protein kinase	ENSGALG00000004998	18.2131	43.2296	1.24705	0.000588588	0.0116307
RAN: GTP-binding nuclear protein Ran	ENSGALG00000002569	187.776	607.233	1.69324	2.25616e-08	1.98687e-06
RANBP1: RAN binding protein 1	ENSGALG00000002107	81.9015	256.801	1.64869	3.64826e-07	2.35843e-05
RANBP3: RAN binding protein 3	ENSGALG00000000577	19.431	43.1756	1.15185	9.07311e-09	8.85938e-07
RANGAP1: Ran GTPase activating protein 1	ENSGALG00000011966	11.6173	31.1795	1.42432	0.00285491	0.037228
RAP1B: RAP1B, member of RAS oncogene family	ENSGALG00000009927	14.5717	45.7449	1.65044	0.00123881	0.0205766
RAP2A: RAP2A, member of RAS oncogene family	ENSGALG00000016889	23.2467	102.806	2.14483	5.05916e-05	0.00163753
RAP2C: RAP2C, member of RAS oncogene family	ENSGALG00000006061	25.0586	95.8241	1.93509	8.01476e-05	0.00235864
RARS: arginyl-tRNA synthetase	ENSGALG00000001850	73.8624	195.009	1.40063	3.23704e-05	0.00115863
RASA2: RAS p21 protein activator 2	ENSGALG00000002850	31.0141	68.9962	1.15359	1.31363e-06	7.12935e-05
RASA3: RAS p21 protein activator 3	ENSGALG00000016817	17.4507	50.7104	1.53899	4.42463e-06	0.000204876
RASL11B: RAS-like, family 11, member B	ENSGALG00000013948	10.3961	98.0809	3.23793	2.15779e-08	1.90743e-06
RASSF3: Ras association (RalGDS/AF-6) domain family member 3	ENSGALG00000009842	4.88743	20.341	2.05724	0.000508132	0.0103929
RBBP5: retinoblastoma binding protein 5	ENSGALG00000000668	8.09615	19.6952	1.28253	0.000255044	0.00605491
RBM12B: RNA binding motif protein 12B	ENSGALG00000015930	10.8378	40.258	1.8932	0.00264711	0.035544
RBM17: RNA binding motif protein 17	ENSGALG00000006332	28.1403	71.206	1.33936	6.75904e-13	1.61431e-10
RBM25: RNA binding motif protein 25	ENSGALG00000009332	57.0915	141.535	1.30981	6.07094e-05	0.00190427
RBM26: RNA binding motif protein 26	ENSGALG00000016910	94.2731	230.307	1.28864	8.65974e-15	2.92887e-12
RBM45: RNA binding motif protein 45	ENSGALG00000009202	20.0619	41.8443	1.06057	0.000179194	0.0045258
RBMXL1: RNA binding motif protein, X-linked-like 1	ENSGALG00000006457	48.7039	123.463	1.34197	0.00024129	0.0057932
RCN2: reticulocalbin 2, EF-hand calcium binding domain	ENSGALG00000002844	32.9646	180.401	2.45222	0	0
RCOR1: REST corepressor 1	ENSGALG00000011384	17.2803	63.0632	1.86767	0.000335016	0.00751034
RDX: radixin	ENSGALG00000017153	45.5758	98.1105	1.10614	2.97501e-06	0.000144641
REEP2: receptor accessory protein 2	ENSGALG00000017365	18.0186	63.8809	1.8259	1.25132e-06	6.87107e-05
RER1: RER1 retention in endoplasmic reticulum 1 homolog (S. cerevisiae)	ENSGALG00000021683	4.46986	9.98375	1.15935	3.99915e-05	0.00134867
RFC3: replication factor C (activator 1) 3, 38kDa	ENSGALG00000017064	5.74944	20.015	1.79959	0.00138481	0.0223959
RFTN2: raftlin family member 2	ENSGALG00000008118	5.61114	41.1735	2.87535	5.44009e-14	1.56735e-11
RHOB: ras homolog family member B	ENSGALG00000016485	7.48118	34.991	2.22565	0.00041967	0.00899343
RHOBTB2: Rho-related BTB domain containing 2	ENSGALG00000000452	0.965633	36.623	5.24513	0.000602902	0.0118534
RIF1: RAP1 interacting factor homolog	ENSGALG00000012484	41.4398	88.19	1.0896	0	0
RIMKLB: ribosomal modification protein rimK-like family member B	ENSGALG00000014274	8.72617	24.5548	1.49258	0.000664774	0.0127791
RIOK3: RIO kinase 3	ENSGALG00000015004	15.2539	41.9459	1.45935	3.76902e-05	0.00128781
RMB12: RNA binding motif protein 12	ENSGALG00000001579	52.2052	114.628	1.1347	2.46224e-09	2.76256e-07
RMND5A: required for meiotic nuclear division 5 homolog A	ENSGALG00000015815	5.75271	20.2213	1.81356	0.00318765	0.0399303
RNASEH2B: ribonuclease H2 subunit B	ENSGALG00000017015	15.1561	30.6564	1.01629	0.00138831	0.0224252
RNF114: ring finger protein 114	ENSGALG00000008021	6.10383	19.7868	1.69675	5.32664e-08	4.25712e-06
RNF126: ring finger protein 126	ENSGALG00000001399	26.4658	56.7691	1.10097	2.30448e-05	0.000875892
RNF144A: ring finger protein 144A	ENSGALG00000016401	2.19432	14.24	2.69811	4.91288e-06	0.000224368
RNF151: ring finger protein 151	ENSGALG00000015957	4.08553	17.5921	2.10633	0.00121716	0.0203037
RNF168: ring finger protein 168, E3 ubiquitin protein ligase	ENSGALG00000006392	14.2569	30.1024	1.07822	4.94019e-05	0.00161018
RNF216: ring finger protein 216	ENSGALG00000004629	6.36618	13.7824	1.11433	0.00232997	0.0326071
RNF4: ring finger protein 4	ENSGALG00000015668	17.4761	42.196	1.27172	0.000240479	0.00577968
RNF6: ring finger protein (C3H2C3 type) 6	ENSGALG00000017105	5.13653	18.787	1.87087	1.10184e-10	1.61721e-08
RNF7: ring finger protein 7	ENSGALG00000021117	4.6604	23.9744	2.36297	0.00022787	0.00549927
RNPS1: RNA binding protein S1, serine-rich domain	ENSGALG00000009288	28.2288	96.4618	1.77279	0.000731138	0.0137491
ROBO2: roundabout, axon guidance receptor, homolog 2 (Drosophila)	ENSGALG00000015519	25.7576	70.9856	1.46253	1.10794e-06	6.17086e-05
ROCK1: Rho-associated, coiled-coil containing protein kinase 1	ENSGALG00000014922	14.6252	36.1084	1.30387	6.90419e-05	0.0021042
ROGDI: rogdi homolog (Drosophila)	ENSGALG00000001841	7.53592	27.2998	1.85704	9.61125e-07	5.48367e-05
RP9: retinitis pigmentosa 9 (autosomal dominant)	ENSGALG00000019605	7.54666	24.4401	1.69534	0.0039856	0.0464946
RPF1: ribosome production factor 1 homolog (S. cerevisiae)	ENSGALG00000008796	11.0205	38.4999	1.80466	0.000691312	0.0131485
RPGRIP1L: RPGRIP1-like	ENSGALG00000003602	8.09062	17.6626	1.12638	0	0
RPL7L1: ribosomal protein L7-like 1	ENSGALG00000011974	7.44645	25.7799	1.79162	0.00200133	0.0295228
RPLP0: acidic ribosomal phosphoprotein	ENSGALG00000023294	84.7818	392.587	2.21118	9.17518e-05	0.00261957
RPRD1A: regulation of nuclear pre-mRNA domain containing 1A	ENSGALG00000013129	10.1568	30.676	1.59467	6.6045e-05	0.00204738
RPS6KC1: ribosomal protein S6 kinase, 52kDa, polypeptide 1	ENSGALG00000009796	4.99855	10.6559	1.09207	0.00115663	0.0196736
RPSA :40S ribosomal protein SA	ENSGALG00000011951	98.0356	596.35	2.60478	5.73084e-07	3.53811e-05
RRM2: ribonucleotide reductase M2	ENSGALG00000016442	46.9093	110.866	1.24087	0.00157113	0.0246408
RRN3: RRN3 RNA polymerase I transcription factor homolog (S. cerevisiae)	ENSGALG00000002862	4.36275	15.4916	1.82818	4.07787e-05	0.00137126
RRP12: ribosomal RNA processing 12 homolog (S. cerevisiae)	ENSGALG00000007603	10.3157	36.1554	1.80937	0.000614579	0.0120221
RRP1B: ribosomal RNA processing 1 homolog B (S. cerevisiae)	ENSGALG00000022808	42.2428	103.099	1.28726	5.01679e-08	4.04055e-06
RRP7A: ribosomal RNA processing 7 homolog A (S. cerevisiae)	ENSGALG00000011866	9.31324	32.9484	1.82286	0.00310307	0.0393354
RSBN1: round spermatid basic protein 1	ENSGALG00000001860	6.3847	14.3426	1.16762	0.000767108	0.0142825
RSL1D1: ribosomal L1 domain containing 1	ENSGALG00000002873	41.614	97.8478	1.23347	0.00106901	0.0186176
RTEL1: regulator of telomere elongation helicase 1	ENSGALG00000006123	13.6268	31.2191	1.19598	5.23122e-07	3.25549e-05
RTN4: reticulon 4	ENSGALG00000008130	246.077	768.172	1.64232	7.24471e-07	4.31301e-05
RTN4R: reticulon 4 receptor	ENSGALG00000007732	6.00732	29.8531	2.31309	0.000440117	0.00932879
RUVBL1: RuvB-like 1 (E. coli)	ENSGALG00000005931	18.4225	56.8049	1.62455	0.00158622	0.0247775
RXRG: retinoid X receptor, gamma	ENSGALG00000003406	11.8918	206.343	4.11701	2.22045e-16	9.09097e-14
SAE2: SUMO-1 activating enzyme subunit 2	ENSGALG00000005006	66.664	152.556	1.19436	9.11223e-09	8.8605e-07
SAP30L: SAP30-like	ENSGALG00000004007	12.4812	27.6193	1.14592	0.00110407	0.0190856
SAPCD2: suppressor APC domain containing 2	ENSGALG00000009060	5.46253	18.9707	1.79613	0.00422327	0.0481666
SAR1A: SAR1 homolog A (S. cerevisiae)	ENSGALG00000004431	10.3839	29.9154	1.52655	0.00348677	0.0422048
SAR1B: GTP-binding protein SAR1b	ENSGALG00000006419	9.19328	36.534	1.99059	0.000116805	0.00319938
SART3: squamous cell carcinoma antigen recognized by T cells 3	ENSGALG00000004887	35.2496	78.5481	1.15597	9.72165e-08	7.34221e-06
SBDS: Shwachman-Bodian-Diamond syndrome	ENSGALG00000001104	10.5081	31.2971	1.57453	0.0042824	0.0485981
SCAF11: SR-related CTD-associated factor 11	ENSGALG00000009672	84.9357	183.505	1.11138	0.000169389	0.00433922
SCP2: sterol carrier protein 2	ENSGALG00000010652	17.9449	60.4545	1.75227	4.14356e-05	0.00139134
SCRIB: scribbled homolog (Drosophila)	ENSGALG00000000075	21.8185	50.7903	1.21901	0.00115986	0.0196856
SCYL2: SCY1-like 2 protein	ENSGALG00000011569	24.55	71.528	1.54279	1.42997e-13	3.83576e-11
SDAD1: SDA1 domain containing 1	ENSGALG00000011543	19.6315	58.4211	1.57332	2.43614e-11	4.30699e-09
SDC1: syndecan 1	ENSGALG00000016480	47.5024	96.4759	1.02217	0.00029142	0.00676703
SDCBP: syndecan binding protein (syntenin)	ENSGALG00000015436	51.1323	106.831	1.06303	7.19659e-10	8.74722e-08
SEC23IP: SEC23 interacting protein	ENSGALG00000009466	9.12092	21.5649	1.24144	0.00382103	0.0451729
SEC24C: SEC24 family, member C (S. cerevisiae)	ENSGALG00000005181	40.4724	81.2012	1.00456	4.45025e-06	0.000205655
SECISBP2: SECIS binding protein 2	ENSGALG00000010694	12.9381	26.0457	1.00942	6.51406e-11	1.0122e-08
SECISBP2: SECIS binding protein 2	ENSGALG00000001827	10.7083	21.5528	1.00915	0.00316276	0.0397433
SEH1L: SEH1-like (S. cerevisiae)	ENSGALG00000013872	16.8921	54.0453	1.67782	1.44803e-06	7.82237e-05
SELO: selenoprotein O	ENSGALG00000008694	1.50064	7.90676	2.39751	0.00178483	0.0270647
SELRC1: Sel1 repeat containing 1	ENSGALG00000010637	12.2224	28.6581	1.22941	0.00145718	0.0231874
SEPHS1: selenophosphate synthetase 1	ENSGALG00000014575	9.6813	22.7747	1.23416	9.61209e-11	1.42877e-08
SERBP1: SERPINE1 mRNA binding protein 1	ENSGALG00000011229	257.497	768.793	1.57804	3.81297e-08	3.21239e-06
SERPINE2: serpin peptidase inhibitor, clade E (nexin, plasminogen activator inhibitor type 1), member 2	ENSGALG00000005135	44.4438	193.649	2.12339	3.93483e-08	3.30313e-06
SET: SET nuclear oncogene	ENSGALG00000004701	36.8026	116.822	1.66644	0.000866235	0.0155862
SETD3: SET domain containing 3	ENSGALG00000011134	9.26798	20.4161	1.13938	0.00117659	0.0197968
SETD7: SET domain containing (lysine methyltransferase) 7	ENSGALG00000009800	14.2665	41.1365	1.52779	6.9455e-10	8.48624e-08
SETX: senataxin	ENSGALG00000003661	46.0261	97.0149	1.07575	3.19565e-07	2.11863e-05
SETX: senataxin	ENSGALG00000014772	4.02641	8.48815	1.07596	1.11983e-08	1.06569e-06
SF3B3: splicing factor 3b, subunit 3, 130kDa	ENSGALG00000002531	69.8148	150.117	1.10448	0.000895368	0.0160239
SFMBT1: Scm-like with four mbt domains 1	ENSGALG00000001753	4.38399	10.4793	1.25723	0.00115541	0.0196673
SFPQ: splicing factor proline/glutamine-rich	ENSGALG00000002514	48.8272	118.117	1.27447	1.24033e-10	1.79787e-08
SFRS7-1: splicing factor arginine/serine-rich 7 35kDa	ENSGALG00000013825	24.6859	57.3061	1.215	0.00101058	0.0177455
SFXN1: sideroflexin 1	ENSGALG00000003263	33.7025	74.0091	1.13485	6.91576e-05	0.0021042
SGK223: homolog of rat pragma of Rnd2	ENSGALG00000019003	1.07428	7.01384	2.70683	0.000169009	0.00433424
SGOL1: shugoshin-like 1 (S. pombe)	ENSGALG00000011281	6.64244	22.7695	1.77732	5.81742e-06	0.000262087
SH3PXD2A: SH3 and PX domains 2A	ENSGALG00000008293	53.6028	168.104	1.64897	3.70166e-07	2.38634e-05
SH3PXD2B: SH3 and PX domains 2B	ENSGALG00000002831	3.76786	11.9702	1.66763	8.57092e-14	2.40987e-11
SH3RF1: SH3 domain containing ring finger 1	ENSGALG00000009692	22.3277	64.3804	1.52779	0.0026277	0.0353445
SHCBP1: SHC SH2-domain binding protein 1	ENSGALG00000004444	6.16328	20.7545	1.75165	3.78644e-06	0.000178513
SIKE1: suppressor of IKBKE 1	ENSGALG00000002147	38.7786	110.633	1.51245	0.00382757	0.0451982
SKIV2L2: superkiller viralicidic activity 2-like 2 (S. cerevisiae)	ENSGALG00000014709	17.1305	60.1531	1.81207	0.000249919	0.00595748
SKP2: S-phase kinase-associated protein 2, E3 ubiquitin protein ligase	ENSGALG00000003547	27.6486	90.9961	1.7186	0.00138431	0.0223959
SLC12A7: solute carrier family 12	ENSGALG00000012497	8.85745	22.4097	1.33916	6.16823e-06	0.000276292
SLC20A2: solute carrier family 20 (phosphate transporter), member 2	ENSGALG00000010159	7.09345	19.3194	1.4455	0.00116205	0.0196941
SLC25A13: solute carrier family 25 (aspartate/glutamate carrier), member 13	ENSGALG00000009728	16.6046	44.7445	1.43013	0.00340869	0.0414532
SLC25A15: solute carrier family 25	ENSGALG00000017032	9.76722	22.5804	1.20905	0.00157672	0.0246786
SLC25A16: solute carrier family 25 (mitochondrial carrier; Graves disease autoantigen), member 16	ENSGALG00000004065	8.50635	29.2345	1.78106	8.55676e-05	0.00246835
SLC25A32: solute carrier family 25 (mitochondrial folate carrier) , member 32	ENSGALG00000016072	9.36599	21.1283	1.17367	0.00313665	0.0396319
SLC25A46: solute carrier family 25, member 46	ENSGALG00000000253	3.59747	15.4834	2.10566	0.0017678	0.0268763
SLC26A5: solute carrier family 26, member 5 (prestin)	ENSGALG00000008222	9.01669	28.929	1.68185	1.20749e-07	8.83363e-06
SLC35E3: solute carrier family 35, member E3	ENSGALG00000009940	13.1519	58.279	2.14771	7.92727e-05	0.00234176
SLC35F2: solute carrier family 35, member F2	ENSGALG00000017167	8.10128	29.6415	1.8714	2.678e-05	0.000995166
SLC35F5: solute carrier family 35, member F5	ENSGALG00000012166	4.66673	15.4007	1.72251	1.37488e-05	0.000558982
SLC38A2: sodium-coupled neutral amino acid transporter 2	ENSGALG00000008497	37.3522	128.112	1.77814	0	0
SLC7A11: solute carrier family 7 (anionic amino acid transporter light chain, xc- system), member 11	ENSGALG00000009758	1.67248	11.4867	2.7799	2.8125e-05	0.00103038
SLC7A2: solute carrier family 7 (cationic amino acid transporter, y+ system), member 2	ENSGALG00000013627	4.1745	15.3301	1.87669	0.00414321	0.0475838
SLC7A3: solute carrier family 7	ENSGALG00000005727	28.6562	66.8934	1.22301	0.00263163	0.0353769
SLC7A5: solute carrier family 7 (amino acid transporter light chain, L system), member 5	ENSGALG00000005845	62.2965	151.903	1.28592	2.82158e-06	0.000138045
SLIT1: slit homolog 1	ENSGALG00000007622	9.23481	37.2202	2.01093	3.91927e-09	4.15746e-07
SLTM: SAFB-like, transcription modulator	ENSGALG00000004192	21.4401	46.0123	1.10171	1.82822e-06	9.39762e-05
SMC2: structural maintenance of chromosomes 2	ENSGALG00000015691	155.854	325.765	1.06363	2.22045e-16	9.09097e-14
SMC3: structural maintenance of chromosomes 3	ENSGALG00000008585	100.451	220.224	1.13248	1.42271e-08	1.29536e-06
SMC5: structural maintenance of chromosomes 5	ENSGALG00000015118	41.029	102.168	1.31623	0.000285726	0.00665469
SMPD3: sphingomyelin phosphodiesterase 3	ENSGALG00000000780	9.42306	55.5982	2.56077	1.28211e-06	6.9908e-05
SMS: spermine synthase	ENSGALG00000016379	25.8625	61.955	1.26036	0.000243606	0.0058428
SMYD3: SET and MYND domain containing 3	ENSGALG00000010653	2.67435	12.2402	2.19437	0.00172701	0.0263592
SNAI2: snail homolog 2 (Drosophila)	ENSGALG00000015241	71.4721	290.735	2.02425	1.52418e-05	0.000609706
SNIP1: Smad nuclear interacting protein 1	ENSGALG00000002010	9.69315	26.0289	1.42507	0.000118992	0.00324028
SNRNP200: activating signal cointegrator 1 complex subunit 3-like 1	ENSGALG00000003477	5.39828	15.8333	1.55239	7.88845e-05	0.00233324
SNRPB: small nuclear ribonucleoprotein polypeptides B and B1	ENSGALG00000007250	4.46527	15.2638	1.7733	0.0024018	0.0331661
SNRPB2: small nuclear ribonucleoprotein polypeptide B	ENSGALG00000008729	13.1214	40.9109	1.64057	0.00124746	0.0206829
SNRPD3: small nuclear ribonucleoprotein D3 polypeptide 18kDa	ENSGALG00000006596	26.4035	80.8984	1.61538	0.00166293	0.0257859
SNX6: sorting nexin 6	ENSGALG00000010025	40.6066	107.222	1.40082	1.56396e-06	8.25749e-05
SOAT1: sterol O-acyltransferase 1	ENSGALG00000004205	28.9604	97.5039	1.75138	3.23045e-05	0.00115805
SOCS6: suppressor of cytokine signaling 6	ENSGALG00000013731	3.23246	16.4102	2.34389	0.00120334	0.0201452
SOS2: son of sevenless homolog 2 (Drosophila)	ENSGALG00000012273	15.3035	39.694	1.37506	0.00104658	0.0182814
SOX10: SRY (sex determining region Y)-box 10	ENSGALG00000012290	28.6226	314.811	3.45926	0	0
SOX5: SRY (sex determining region Y)-box 5	ENSGALG00000013204	37.2944	124.601	1.74028	0	0
SOX8: SRY (sex determining region Y)-box 8	ENSGALG00000005263	4.8812	47.355	3.27821	6.51411e-09	6.55257e-07
SP3: Sp3 transcription factor	ENSGALG00000009327	34.3275	90.8148	1.40356	0.00157943	0.0247045
SPATA2: spermatogenesis associated 2	ENSGALG00000008026	5.85719	21.3544	1.86625	0.00299554	0.0384738
SPATA5: spermatogenesis associated 5	ENSGALG00000011833	10.0815	25.3141	1.32824	0.00180689	0.0272861
SPECC1: sperm antigen with calponin homology and coiled-coil domains 1	ENSGALG00000004400	8.65599	19.5842	1.17792	1.17451e-06	6.47978e-05
SPIN1: spindlin 1	ENSGALG00000014916	21.1099	59.8999	1.50464	0.00141885	0.0227572
SPINT1: serine peptidase inhibitor, Kunitz type 1	ENSGALG00000008469	17.935	53.2636	1.57038	3.72371e-06	0.000176626
SPIRE1: spire homolog 1 (Drosophila)	ENSGALG00000013817	4.80821	24.7762	2.36538	1.63765e-07	1.15812e-05
SPO11: SPO11 meiotic protein covalently bound to DSB homolog	ENSGALG00000007662	13.028	47.5573	1.86805	9.91448e-06	0.000414649
SPRY2: sprouty homolog 2 (Drosophila)	ENSGALG00000016906	5.29029	19.0587	1.84903	0.00420288	0.0480562
SPTLC1: serine palmitoyltransferase, long chain base subunit 1	ENSGALG00000013493	17.325	57.3817	1.72774	0.000629578	0.0122539
SRD5A3: steroid 5 alpha-reductase 3	ENSGALG00000013804	12.4772	28.6361	1.19853	0.00221545	0.0314539
SRI: sorcin	ENSGALG00000008985	13.427	41.6581	1.63346	3.08554e-05	0.00111986
SRP19: signal recognition particle 19kDa	ENSGALG00000000218	23.3146	99.3254	2.09093	0.000382901	0.00841409
SRP54: signal recognition particle 54kDa	ENSGALG00000023135	14.6937	43.4211	1.5632	0.0043397	0.0489299
SRP68: signal recognition particle 68kDa	ENSGALG00000002062	12.977	33.1194	1.35172	0.00273792	0.0362216
SRSF11: serine/arginine-rich splicing factor 11	ENSGALG00000011305	95.9128	193.716	1.01415	7.32304e-07	4.33057e-05
SSB: Sjogren syndrome antigen B (autoantigen La)	ENSGALG00000009677	287.221	805.767	1.4882	4.35978e-08	3.5952e-06
SSU72: SSU72 RNA polymerase II CTD phosphatase homolog (S. cerevisiae)	ENSGALG00000001489	18.0748	53.1059	1.55489	0.00387968	0.0456121
ST13: suppression of tumorigenicity 13 (colon carcinoma) (Hsp70 interacting protein)	ENSGALG00000012007	18.9547	73.1221	1.94775	0.000171203	0.00436652
ST5: suppression of tumorigenicity 5	ENSGALG00000005927	20.4898	118.631	2.5335	0	0
ST8: alpha-N-acetyl-neuraminide alpha-2,8-sialyltransferase 1	ENSGALG00000013211	19.0942	58.769	1.62192	0.00243204	0.0335044
STAG2: stromal antigen 2	ENSGALG00000008482	23.0388	55.7892	1.27592	6.54936e-11	1.0122e-08
STAMBP: STAM binding protein	ENSGALG00000000183	4.19081	9.18047	1.13134	0.00405647	0.0469937
STARD4: StAR-related lipid transfer (START) domain containing 4	ENSGALG00000000241	2.3108	8.33807	1.85132	0.00354364	0.0427335
STARD5: StAR-related lipid transfer (START) domain containing 5	ENSGALG00000021193	4.35385	15.1391	1.79791	0.00324809	0.0403712
STARD8: StAR-related lipid transfer (START) domain containing 8	ENSGALG00000004575	1.17007	6.17099	2.39891	0.000394615	0.00859863
STAU1: Staufen	ENSGALG00000004736	14.1415	36.5448	1.36973	0.00248306	0.0340066
STIM2: stromal interaction molecule 2	ENSGALG00000014355	8.00344	24.0512	1.58742	3.67255e-05	0.00126404
STK38L: serine/threonine kinase 38 like	ENSGALG00000014094	31.2335	65.0878	1.05929	0.00078968	0.0145447
STK39: serine threonine kinase 39	ENSGALG00000010930	4.64635	22.2303	2.25836	9.18201e-05	0.00261957
STMN: Stathmin	ENSGALG00000001475	268.903	560.139	1.0587	0.00343183	0.0416477
STRADA: STE20-related kinase adaptor alpha	ENSGALG00000000550	14.3682	33.4751	1.22021	0.00383599	0.0452352
STT3B: dolichyl-diphosphooligosaccharide--protein glycosyltransferase subunit STT3B	ENSGALG00000011465	53.4918	129.857	1.27954	1.22327e-07	8.9211e-06
STX16: syntaxin 16	ENSGALG00000007541	8.95188	30.3512	1.76149	0.0012425	0.0206231
STX7: syntaxin 7	ENSGALG00000002930	7.92039	16.1911	1.03156	0.000477195	0.00988136
STXBP3: syntaxin binding protein 3	ENSGALG00000002001	7.44399	18.1677	1.28722	0.00288078	0.0373701
STYX: serine/threonine/tyrosine interacting protein	ENSGALG00000012411	6.84425	24.7114	1.85221	2.77099e-05	0.00101819
SUB1: SUB1 homolog (S. cerevisiae)	ENSGALG00000003248	45.394	251.539	2.47021	5.62883e-13	1.41247e-10
SUDS3: suppressor of defective silencing 3 homolog	ENSGALG00000007393	15.6857	35.3319	1.17152	0.000103067	0.00289444
SUFU: suppressor of fused homolog (Drosophila)	ENSGALG00000008096	32.4709	96.5358	1.57191	6.01602e-05	0.0018993
SUGP2: SURP and G patch domain containing 2	ENSGALG00000003047	23.4479	49.5827	1.08038	2.76491e-08	2.38981e-06
SUN1: Sad1 and UNC84 domain containing 1	ENSGALG00000003781	12.1773	26.7378	1.13469	4.44089e-16	1.78685e-13
SYNCRIP: synaptotagmin binding, cytoplasmic RNA interacting protein	ENSGALG00000015830	69.0741	176.287	1.35171	8.83251e-08	6.73609e-06
SYNPR: synaptoporin	ENSGALG00000007284	2.35416	14.1653	2.58908	0.00100091	0.0176022
TAB1: TGF-beta-activated kinase 1 and MAP3K7-binding protein 1	ENSGALG00000012150	34.2819	97.2854	1.50477	1.646e-05	0.000649962
TAF3: RNA polymerase II transcription factor TAFII140	ENSGALG00000006731	73.0148	147.171	1.01123	0.000581515	0.01153
TAF4B: TAF4b RNA polymerase II, TATA box binding protein (TBP)-associated factor	ENSGALG00000015122	29.5495	59.6794	1.0141	0.00114835	0.0196043
TAF5: TAF5 RNA polymerase II, TATA box binding protein (TBP)-associated factor	ENSGALG00000008241	4.58695	17.8986	1.96424	0.00437137	0.0492111
TAF5L: TAF5-like RNA polymerase II, p300/CBP-associated factor (PCAF)-associated factor, 65kDa	ENSGALG00000011098	11.6267	27.956	1.26571	1.53733e-11	2.84735e-09
TAOK1: TAO kinase 1	ENSGALG00000004082	15.7349	32.9008	1.06415	0.000808582	0.0147816
TARBP1: TAR (HIV-1) RNA binding protein 1	ENSGALG00000011000	8.54336	25.8127	1.59521	6.15514e-07	3.75045e-05
TARDBP: TAR DNA binding protein	ENSGALG00000002906	26.5047	65.0108	1.29443	0.00244507	0.0336442
TBK1: TANK-binding kinase 1	ENSGALG00000009840	11.1566	23.2601	1.05996	0.00275063	0.036325
TCEB1: transcription elongation factor B (SIII), polypeptide 1 (	ENSGALG00000015646	2.83517	10.8867	1.94105	0.000696549	0.0132373
TCP1: t-complex 1	ENSGALG00000011637	118.286	353.55	1.57963	0.00258859	0.0349594
TDRD7: tudor domain containing 7	ENSGALG00000012350	4.73499	15.2921	1.69135	0.00170788	0.0262057
TFAP2A: transcription factor AP-2 alpha (activating enhancer binding protein 2 alpha)	ENSGALG00000012775	16.8426	124.824	2.88971	0	0
TFAP2B: transcription factor AP-2 beta (activating enhancer binding protein 2 beta)	ENSGALG00000016680	22.26	352.857	3.98655	0	0
TFIP11: tuftelin interacting protein 11	ENSGALG00000005623	10.4828	22.424	1.09702	7.27343e-05	0.00218175
TGFB3: transforming growth factor, beta 3	ENSGALG00000010346	19.8576	56.3642	1.50509	0.000163512	0.00422111
TGFBRAP1: transforming growth factor, beta receptor associated protein 1	ENSGALG00000016795	9.05492	19.8692	1.13376	0.00392738	0.0459876
THOC2: THO complex 2	ENSGALG00000008507	69.53	147.21	1.08216	9.33164e-08	7.07054e-06
THOC5: THO complex 5	ENSGALG00000008082	18.2007	41.3461	1.18376	0.000281249	0.00658986
THUMPD1: THUMP domain containing 1	ENSGALG00000002134	22.7848	49.6326	1.12321	0.000403575	0.008753
THUMPD3: THUMP domain containing 3	ENSGALG00000008394	18.2855	46.3693	1.34247	0.000629237	0.0122539
TIMM21: translocase of inner mitochondrial membrane 21 homolog (yeast)	ENSGALG00000013709	4.25499	24.9814	2.55363	0.000496367	0.010188
TIPRL: TIP41, TOR signaling pathway regulator-like (S. cerevisiae)	ENSGALG00000015246	13.049	46.8365	1.84369	0.000755629	0.0141299
TK2: thymidine kinase 2, mitochondrial	ENSGALG00000005261	8.93055	27.4168	1.61824	0.00287709	0.0373429
TLCD1: TLC domain containing 1	ENSGALG00000003973	2.23946	12.3432	2.4625	0.00172552	0.0263537
TLK1: tousled-like kinase 1	ENSGALG00000009569	21.6234	43.6633	1.01383	5.68639e-07	3.51998e-05
TM9SF3: transmembrane 9 superfamily member 3	ENSGALG00000005534	27.6067	75.8285	1.45772	1.29378e-07	9.31884e-06
TMCO1: transmembrane and coiled-coil domains 1	ENSGALG00000002716	18.8874	42.7864	1.17973	2.22045e-16	9.09097e-14
TMED5: transmembrane emp24 protein transport domain containing 5	ENSGALG00000005904	39.9926	109.024	1.44683	1.35447e-14	4.45202e-12
TMEM120B: transmembrane protein 120B	ENSGALG00000004254	14.3161	30.296	1.08149	0.00216169	0.0310254
TMEM123: transmembrane protein 123	ENSGALG00000017185	8.67533	40.3155	2.21634	0.000194175	0.00485168
TMEM128: transmembrane protein 128	ENSGALG00000014992	3.72078	25.0087	2.74876	1.42652e-08	1.29536e-06
TMEM150C: transmembrane protein 150C	ENSGALG00000011175	14.3854	29.4405	1.0332	0.00134466	0.021903
TMEM237: transmembrane protein 237	ENSGALG00000008381	7.17524	21.6231	1.59147	0.00247534	0.0339407
TMEM55A: transmembrane protein 55A	ENSGALG00000015919	13.9468	39.3679	1.49709	1.30314e-06	7.08892e-05
TMEM65: transmembrane protein 65	ENSGALG00000016339	7.15929	18.9443	1.40387	0.000408308	0.00882285
TMEM68: transmembrane protein 68	ENSGALG00000015325	8.39751	20.5071	1.28809	0.00129082	0.0211692
TMEM87A: transmembrane protein 87A	ENSGALG00000009018	39.8282	112.144	1.49348	1.52548e-06	8.12788e-05
TMM18: Transmembrane protein 18	ENSGALG00000016365	5.84513	23.6026	2.01364	0.00289078	0.037479
TMOD3: tropomodulin 3 (ubiquitous)	ENSGALG00000004710	9.34856	28.9849	1.63248	0.0031457	0.0397246
TMX1: thioredoxin-related transmembrane protein 1	ENSGALG00000020340	0.51816	10.9757	4.40477	0.00212027	0.0306953
TMX3: thioredoxin-related transmembrane protein 3	ENSGALG00000013757	15.9407	84.5164	2.40651	4.66294e-15	1.64877e-12
TMX4: thioredoxin-related transmembrane protein 4	ENSGALG00000008853	5.97216	18.7262	1.64874	0.00209322	0.0303979
TNFRSF1A: tumor necrosis factor receptor superfamily, member 1A precursor	ENSGALG00000014890	4.18244	13.5676	1.69775	0.00157282	0.0246507
TNKS2: tankyrase, TRF1-interacting ankyrin-related ADP-ribose polymerase 2	ENSGALG00000014614	11.7754	51.5681	2.1307	1.75417e-09	1.99693e-07
TNRC6C: trinucleotide repeat containing 6C	ENSGALG00000001725	23.1379	61.9378	1.42057	0.00300089	0.0384838
TOLLIP: toll interacting protein	ENSGALG00000006697	5.76185	25.4389	2.14243	0.000226571	0.00547925
TOM1L2: target of myb1-like 2	ENSGALG00000004902	49.4332	108.813	1.13829	0.00239568	0.0331318
TOPBP1: topoisomerase (DNA) II binding protein 1	ENSGALG00000011725	13.2445	27.1109	1.03347	0.00428568	0.0485981
TPCN2: two pore segment channel 2	ENSGALG00000007550	2.09689	6.29467	1.58588	0.00356226	0.0428297
TPD52: tumor protein D52	ENSGALG00000015744	18.5962	66.4996	1.83834	0.0010641	0.0185458
TPP2: tripeptidyl peptidase II	ENSGALG00000016865	36.3888	89.0927	1.29181	5.59681e-11	8.88522e-09
TPRG1L: tumor protein p63 regulated 1-like	ENSGALG00000001024	7.46878	39.9167	2.41805	0.000592049	0.0116596
TRA2A: transformer 2 alpha homolog (Drosophila)	ENSGALG00000010973	49.3505	171.695	1.79871	7.39131e-09	7.34005e-07
TRA2B: transformer 2 beta homolog (Drosophila)	ENSGALG00000006531	86.8869	196.273	1.17565	0	0
TRABD: TraB domain containing	ENSGALG00000008705	17.1484	66.6407	1.95833	1.64313e-14	5.32382e-12
TRAM1: translocation associated membrane protein 1	ENSGALG00000015629	33.1881	91.1473	1.45753	4.33207e-07	2.71767e-05
TRAPPC2: trafficking protein particle complex 2	ENSGALG00000016578	12.1905	43.0458	1.82012	0.00188781	0.0282229
TRMT10A: tRNA methyltransferase 10 homolog A (S. cerevisiae)	ENSGALG00000012264	4.38995	14.0316	1.6764	1.32609e-06	7.18026e-05
TRNT1: tRNA nucleotidyl transferase, CCA-adding, 1	ENSGALG00000017368	21.9229	57.0405	1.37955	0.00134589	0.021903
TRUB1: TruB pseudouridine (psi) synthase homolog 1 (E. coli)	ENSGALG00000009091	5.36239	20.9735	1.96762	0.0016761	0.0259212
TRUB2: TruB pseudouridine (psi) synthase homolog 2 (E. coli)	ENSGALG00000004920	2.76072	7.76256	1.49149	0.0025534	0.034685
TSPAN14: tetraspanin 14	ENSGALG00000002414	12.9239	36.0601	1.48036	0.000149316	0.00394185
TSSC1: tumor suppressing subtransferable candidate 1	ENSGALG00000016385	4.72512	19.9224	2.07597	0.000559212	0.0111828
TSSC4: tumor suppressing subtransferable candidate 4	ENSGALG00000006530	13.3745	69.964	2.38713	3.18446e-05	0.00114862
TTC13: tetratricopeptide repeat domain 13	ENSGALG00000011152	6.74738	24.9784	1.88828	0.000111658	0.00307646
TTC37: tetratricopeptide repeat domain 37	ENSGALG00000014670	14.1381	36.5294	1.36947	2.26893e-08	1.9906e-06
TTLL1: tubulin tyrosine ligase-like family, member 1	ENSGALG00000014163	1.66242	5.21249	1.64869	0.001395	0.0224984
TUBA4A: tubulin, alpha 4a	ENSGALG00000011324	46.9441	127.352	1.4398	0.00429459	0.0486047
TUBGCP5: tubulin, gamma complex associated protein 5	ENSGALG00000016735	6.93715	17.0727	1.29928	4.94138e-09	5.1252e-07
TWSG1: twisted gastrulation homolog 1 (Drosophila)	ENSGALG00000008400	19.4723	63.5268	1.70594	0	0
TXNDC9: thioredoxin domain containing 9	ENSGALG00000016763	5.94967	16.2571	1.45018	0.00354885	0.0427467
TXNRD3: thioredoxin reductase 3	ENSGALG00000006193	46.9672	135.001	1.52324	0.003532	0.0426416
TYW3: tRNA-yW synthesizing protein 3 homolog (S. cerevisiae)	ENSGALG00000011364	12.1228	34.8901	1.52509	0.000212684	0.00521367
U2AF1: U2 small nuclear RNA auxiliary factor 1	ENSGALG00000016198	17.0421	43.7961	1.3617	0.00190219	0.0283471
UACA: uveal autoantigen with coiled-coil domains and ankyrin repeats	ENSGALG00000008143	58.3128	215.342	1.88475	0	0
UAP1L1: UDP-N-acteylglucosamine pyrophosphorylase 1-like 1	ENSGALG00000009090	7.64259	25.1355	1.71759	1.54975e-10	2.16566e-08
UBC9: SUMO-conjugating enzyme UBC9	ENSGALG00000006428	55.6847	133.405	1.26046	0.00132509	0.0216646
UBE3A: ubiquitin protein ligase E3A	ENSGALG00000016747	12.1991	35.2472	1.53074	0.00323648	0.0403097
Ubiquitin carboxyl-terminal hydrolase	ENSGALG00000004455	54.9455	127.06	1.20944	3.29998e-05	0.00117217
UBLCP1: ubiquitin-like domain containing CTD phosphatase 1	ENSGALG00000003672	14.275	50.524	1.82347	0.00118016	0.0198283
UBXN7: UBX domain protein 7	ENSGALG00000006385	11.061	24.9742	1.17495	6.57208e-05	0.00204225
UFM1: ubiquitin-fold modifier 1	ENSGALG00000017042	8.66181	30.2951	1.80635	0.00191933	0.0285217
UGDH: UDP-glucose 6-dehydrogenase	ENSGALG00000014320	13.3801	33.609	1.32875	0.00343479	0.0416621
UHRF2: ubiquitin-like with PHD and ring finger domains 2, E3 ubiquitin protein ligase	ENSGALG00000015052	41.8185	141.94	1.76307	6.71219e-12	1.31632e-09
UIF: UAP56-interacting factor	ENSGALG00000007581	14.6574	44.1075	1.58939	0.00355773	0.0427973
UNC50: unc-50 homolog (C. elegans)	ENSGALG00000016753	17.9739	65.6053	1.86791	0.00169326	0.0260486
Uncharacterized protein	ENSGALG00000025628	13886	165842	3.57811	2.58221e-07	1.73164e-05
Uncharacterized protein	ENSGALG00000025636	25597.5	92017.5	1.84591	0.00141226	0.022667
Uncharacterized protein	ENSGALG00000025638	20437.4	82686.4	2.01644	0.00038816	0.00850563
Uncharacterized protein	ENSGALG00000025651	21258.3	82469.8	1.95584	0.000519849	0.0106046
Uncharacterized protein	ENSGALG00000022847	6044.24	21463.7	1.82826	0.000178192	0.00450984
Uncharacterized protein	ENSGALG00000008782	125.447	1273.63	3.3438	3.75973e-07	2.4171e-05
Uncharacterized protein	ENSGALG00000022403	106.735	793.857	2.89485	6.41471e-07	3.87824e-05
Uncharacterized protein	ENSGALG00000020516	49.2477	407.658	3.04923	0.000557642	0.0111697
Uncharacterized protein	ENSGALG00000023102	93.2405	358.808	1.94418	0.000601109	0.0118281
Uncharacterized protein	ENSGALG00000012591	100.634	257.509	1.35551	0.000795335	0.0146058
Uncharacterized protein	ENSGALG00000022458	23.3327	203.515	3.12471	0.00270706	0.0360792
Uncharacterized protein	ENSGALG00000013233	96.1955	203.339	1.07984	0.000276353	0.00652099
Uncharacterized protein	ENSGALG00000024159	71.9696	174.987	1.28178	0.00109197	0.0189326
Uncharacterized protein	ENSGALG00000023449	28.1698	166.603	2.56419	0.000418931	0.00898584
Uncharacterized protein	ENSGALG00000022544	44.8345	147.917	1.7221	0.00349695	0.0423061
Uncharacterized protein	ENSGALG00000007605	55.109	146.147	1.40706	0.000188455	0.00472899
Uncharacterized protein	ENSGALG00000021213	45.9863	134.647	1.5499	0.000812257	0.0147975
Uncharacterized protein	ENSGALG00000006485	39.5816	130.554	1.72174	0.000561376	0.0112165
Uncharacterized protein	ENSGALG00000015639	56.0543	128.017	1.19144	3.66644e-10	4.75355e-08
Uncharacterized protein	ENSGALG00000005809	41.3469	122.354	1.56521	0.000219302	0.00533665
Uncharacterized protein	ENSGALG00000000663	21.3497	120.717	2.49933	0.000118465	0.00323346
Uncharacterized protein	ENSGALG00000023655	21.6003	104.539	2.27492	0.000556771	0.0111697
Uncharacterized protein	ENSGALG00000013962	36.8041	97.0305	1.39857	0.000605666	0.0118977
Uncharacterized protein	ENSGALG00000000861	40.8963	90.3674	1.14383	0.000348429	0.00776627
Uncharacterized protein	ENSGALG00000013278	22.3111	87.7223	1.97519	0.00097831	0.0172308
Uncharacterized protein	ENSGALG00000007683	42.4216	85.5349	1.01172	0.00299838	0.0384838
Uncharacterized protein	ENSGALG00000010034	15.5739	83.7918	2.42767	1.66207e-06	8.73599e-05
Uncharacterized protein	ENSGALG00000012721	27.7856	72.3373	1.3804	0.00248935	0.0340527
Uncharacterized protein	ENSGALG00000021811	18.729	70.1164	1.90448	1.02483e-06	5.80496e-05
Uncharacterized protein	ENSGALG00000009484	17.8157	67.6131	1.92415	0.000420569	0.00899617
Uncharacterized protein	ENSGALG00000023086	24.5454	65.3326	1.41235	0.000150365	0.00396506
Uncharacterized protein	ENSGALG00000024376	8.09038	65.1587	3.00968	0.000262291	0.00622061
Uncharacterized protein	ENSGALG00000005774	15.0012	60.5768	2.01369	3.51165e-05	0.00122866
Uncharacterized protein	ENSGALG00000001138	11.0826	59.1269	2.41552	0.00327785	0.0406025
Uncharacterized protein	ENSGALG00000023579	9.74558	58.1727	2.57752	0.000239362	0.00576739
Uncharacterized protein	ENSGALG00000011907	13.8229	58.1708	2.07323	0.00406274	0.0469937
Uncharacterized protein	ENSGALG00000004616	26.7552	54.9352	1.03791	0.00163903	0.0254492
Uncharacterized protein	ENSGALG00000006470	26.8188	54.8089	1.03117	5.41607e-05	0.00172435
Uncharacterized protein	ENSGALG00000017358	14.9297	51.4723	1.78561	0.0008405	0.0152407
Uncharacterized protein	ENSGALG00000010888	16.632	49.8996	1.58507	3.77697e-06	0.000178428
Uncharacterized protein	ENSGALG00000017095	14.8219	49.3993	1.73676	0.00174061	0.0265148
Uncharacterized protein	ENSGALG00000003440	21.0169	44.5453	1.08372	2.74025e-12	5.81357e-10
Uncharacterized protein	ENSGALG00000023825	6.86396	44.5079	2.69695	0.000368769	0.00813417
Uncharacterized protein	ENSGALG00000012412	12.3669	44.0159	1.83155	0.000309718	0.0070919
Uncharacterized protein	ENSGALG00000016700	17.3514	42.2342	1.28336	7.11841e-05	0.00214075
Uncharacterized protein	ENSGALG00000022614	9.28268	41.3842	2.15647	0.00407241	0.0470484
Uncharacterized protein	ENSGALG00000000432	13.0431	40.4522	1.63293	0.00160023	0.0249296
Uncharacterized protein	ENSGALG00000016931	17.6489	39.9058	1.17702	0.00219824	0.0313728
Uncharacterized protein	ENSGALG00000000687	16.9329	39.2484	1.21281	0.00123613	0.0205468
Uncharacterized protein	ENSGALG00000013955	12.7225	38.4571	1.59587	5.50828e-09	5.66286e-07
Uncharacterized protein	ENSGALG00000024380	8.11857	37.7046	2.21544	0.00167857	0.0259422
Uncharacterized protein	ENSGALG00000023410	5.16894	36.3988	2.81595	0.000556802	0.0111697
Uncharacterized protein	ENSGALG00000023444	8.34986	35.6774	2.09518	0.000155404	0.00404829
Uncharacterized protein	ENSGALG00000015259	14.7295	35.4671	1.26777	0.000103403	0.00290038
Uncharacterized protein	ENSGALG00000022724	3.98276	33.9703	3.09243	0.000140656	0.00376001
Uncharacterized protein	ENSGALG00000013944	6.47477	33.6731	2.3787	7.29917e-05	0.00218666
Uncharacterized protein	ENSGALG00000023812	12.6612	32.6294	1.36576	0.00440835	0.0494367
Uncharacterized protein	ENSGALG00000012102	3.57535	31.53	3.14057	0.00180171	0.0272323
Uncharacterized protein	ENSGALG00000012641	5.51614	31.078	2.49416	1.69384e-05	0.000667722
Uncharacterized protein	ENSGALG00000014666	15.1305	30.5558	1.01399	0.00134374	0.021903
Uncharacterized protein	ENSGALG00000013155	5.93594	30.257	2.34972	1.70283e-07	1.19696e-05
Uncharacterized protein	ENSGALG00000004911	10.8031	29.2299	1.43601	0.00170797	0.0262057
Uncharacterized protein	ENSGALG00000015692	7.30684	27.1777	1.89511	3.40337e-05	0.00120158
Uncharacterized protein	ENSGALG00000019172	9.19932	25.8454	1.49031	0.000213469	0.00522742
Uncharacterized protein	ENSGALG00000023775	7.96892	24.6957	1.6318	0.00202226	0.0297312
Uncharacterized protein	ENSGALG00000005291	7.77272	24.0047	1.62683	0.000144953	0.00385238
Uncharacterized protein	ENSGALG00000015075	2.45691	23.9095	3.28267	1.13798e-12	2.62941e-10
Uncharacterized protein	ENSGALG00000019468	6.55891	22.4141	1.77288	0.00117476	0.0197903
Uncharacterized protein	ENSGALG00000023090	2.41419	20.5516	3.08964	0.00236432	0.0328821
Uncharacterized protein	ENSGALG00000022874	7.74847	20.5354	1.40613	0.000651843	0.012572
Uncharacterized protein	ENSGALG00000014767	7.05514	20.4754	1.53714	0.00430135	0.0486341
Uncharacterized protein	ENSGALG00000022073	8.70659	20.0289	1.2019	0.000105057	0.00293079
Uncharacterized protein	ENSGALG00000015589	8.00968	18.4156	1.20111	0.000856828	0.0154408
Uncharacterized protein	ENSGALG00000023017	4.62917	18.0093	1.95992	0.00216015	0.0310237
Uncharacterized protein	ENSGALG00000002497	7.43777	15.9678	1.10222	0.00177819	0.0270114
Uncharacterized protein	ENSGALG00000009177	6.51696	14.1707	1.12064	0.000154321	0.00403823
Uncharacterized protein	ENSGALG00000009272	4.74828	14.133	1.57358	8.75471e-06	0.000372147
Uncharacterized protein	ENSGALG00000006286	4.54105	13.2065	1.54015	1.08349e-07	8.11599e-06
Uncharacterized protein	ENSGALG00000002732	2.09054	10.807	2.37003	0.000952878	0.0168543
Uncharacterized protein	ENSGALG00000010720	2.50968	10.4436	2.05704	4.41561e-06	0.000204865
Uncharacterized protein	ENSGALG00000010532	1.82475	8.28755	2.18325	0.00440326	0.0494033
Uncharacterized protein	ENSGALG00000005156	2.34446	6.16358	1.39452	0.00393051	0.0460012
Uncharacterized protein	ENSGALG00000015165	0.855424	5.95643	2.79974	3.25932e-07	2.14262e-05
Uncharacterized protein	ENSGALG00000004322	1.37143	5.78138	2.07574	0.00329891	0.0407668
UNKL: unkempt homolog (Drosophila)-like	ENSGALG00000006450	13.1033	30.1087	1.20025	0.000202702	0.00502706
UPF2: UPF2 regulator of nonsense transcripts homolog (yeast)	ENSGALG00000006694	22.5144	52.9813	1.23464	4.7531e-05	0.0015588
URB2: URB2 ribosome biogenesis 2 homolog	ENSGALG00000011101	11.9834	29.4913	1.29925	3.89906e-10	5.0272e-08
URI1: URI1, prefoldin-like chaperone	ENSGALG00000004506	13.8927	45.5016	1.71159	0.000157712	0.00408947
USP10: ubiquitin specific peptidase 10	ENSGALG00000005674	78.91	177.664	1.17087	0	0
USP14: Ubiquitin carboxyl-terminal hydrolase	ENSGALG00000014920	53.1662	159.213	1.58238	0.00306319	0.0391059
USP15: ubiquitin specific peptidase 15 isoform 2	ENSGALG00000009773	21.4511	48.7746	1.18508	1.10118e-06	6.1582e-05
USP28: ubiquitin specific peptidase 28	ENSGALG00000006969	6.89693	28.2188	2.03263	1.02498e-08	9.84365e-07
USP40: ubiquitin specific peptidase 40	ENSGALG00000004228	5.67	12.5742	1.14904	0.0033682	0.041182
USP46: ubiquitin specific peptidase 46	ENSGALG00000013961	13.5121	65.3152	2.27316	8.35438e-05	0.00243057
USP7: ubiquitin specific peptidase 7 (herpes virus-associated)	ENSGALG00000007307	46.6181	158.197	1.76276	1.12752e-06	6.26496e-05
UTP15: UTP15, U3 small nucleolar ribonucleoprotein, homolog (S. cerevisiae)	ENSGALG00000013510	20.8544	91.7913	2.13801	0.000126718	0.00343065
UTP18: UTP18 small subunit (SSU) processome component homolog (yeast)	ENSGALG00000002985	12.4957	36.6745	1.55335	0.00382898	0.0451982
UVSSA: UV-stimulated scaffold protein A	ENSGALG00000015717	5.82799	12.7331	1.12752	0.00020758	0.00512083
UXS1: UDP-glucuronate decarboxylase 1	ENSGALG00000016801	5.35715	20.0395	1.9033	0.00281857	0.0369648
VAC14: Vac14 homolog (S. cerevisiae)	ENSGALG00000002458	4.99195	16.8243	1.75287	0.000243899	0.0058438
VBP1: von Hippel-Lindau binding protein 1	ENSGALG00000008389	13.7473	33.0773	1.2667	0	0
VCPIP1: valosin containing protein (p97)/p47 complex interacting protein 1	ENSGALG00000015524	9.92148	28.4165	1.5181	0.0041039	0.0472486
VGLL4: vestigial like 4 (Drosophila)	ENSGALG00000004937	33.7502	110.317	1.70869	0.000721676	0.013615
VMP1: vacuole membrane protein 1	ENSGALG00000005160	21.5131	58.3388	1.43924	0.000574622	0.0114127
VPS13A: vacuolar protein sorting 13 homolog A (S. cerevisiae)	ENSGALG00000015170	13.5336	36.1331	1.41677	4.75581e-05	0.0015588
VPS37B: vacuolar protein sorting 37 homolog B (S. cerevisiae)	ENSGALG00000003743	10.9307	47.5039	2.11966	0.00149194	0.0236692
VPS39: vacuolar protein sorting 39	ENSGALG00000008991	11.5737	27.7017	1.25912	0.00124787	0.0206829
VRK1: vaccinia related kinase 1	ENSGALG00000011116	13.1572	35.9905	1.45176	0.0025681	0.0347626
VWA5B1: von Willebrand factor A domain containing 5B1	ENSGALG00000010242	2.76642	6.60261	1.25502	0.00361652	0.0432991
WBP2NL: WBP2 N-terminal like	ENSGALG00000011908	5.32325	15.7594	1.56583	0.00322581	0.0402571
WDR1: WD repeat domain 1	ENSGALG00000014957	19.6897	45.5165	1.20895	0.000131041	0.00353653
WDR11: WD repeat domain 11	ENSGALG00000009486	17.2176	39.5863	1.20112	4.62779e-06	0.000213436
WDR12: WD repeat domain 12	ENSGALG00000008470	20.4288	63.3713	1.63322	0.00332291	0.0408973
WDR33: WD repeat domain 33	ENSGALG00000002043	15.5172	34.4991	1.15269	5.50049e-08	4.36615e-06
WDR41: WD repeat domain 41	ENSGALG00000004350	2.72217	9.76741	1.84322	0.00175194	0.0266699
WDR43: WD repeat domain 43	ENSGALG00000008989	49.4881	168.94	1.77136	1.29676e-11	2.46037e-09
WDR47: WD repeat domain 47	ENSGALG00000002129	10.0514	25.3221	1.333	9.14514e-08	6.9518e-06
WDR5B: WD repeat domain 5B	ENSGALG00000002659	79.1189	186.765	1.23913	3.42627e-07	2.23349e-05
WDR67: WD repeat domain 67	ENSGALG00000016383	12.2545	25.6693	1.06672	0.00213167	0.0307648
WDR7: WD repeat domain 7	ENSGALG00000003019	3.29919	7.14551	1.11493	0.000204174	0.00505281
WDR70: WD repeat domain 70	ENSGALG00000003708	14.7724	51.6176	1.80496	0	0
WDR85: WD repeat domain 85	ENSGALG00000008750	3.54004	12.4025	1.80879	0.003934	0.0460189
WDR92: WD repeat domain 92	ENSGALG00000008760	6.73562	19.4735	1.53163	0.000938944	0.0166632
WDR96: WD repeat domain 96	ENSGALG00000008392	2.65835	10.3648	1.96309	0.000489406	0.0100628
WEE1: WEE1 homolog (S. pombe)	ENSGALG00000005769	19.5433	63.7779	1.70638	7.28657e-07	4.32689e-05
WIPF1: WAS/WASL interacting protein family, member 1	ENSGALG00000009321	2.13983	6.58724	1.62218	1.11042e-07	8.25281e-06
WSB1: WD repeat and SOCS box containing 1	ENSGALG00000005668	35.7355	101.902	1.51175	7.81765e-05	0.00232113
WTAP: Wilms tumor 1 associated protein	ENSGALG00000011660	39.9416	89.301	1.16078	1.67215e-10	2.32279e-08
WWOX: WW domain containing oxidoreductase	ENSGALG00000005377	2.19246	10.7881	2.29882	0.000137637	0.003692
WWP1: WW domain containing E3 ubiquitin protein ligase 1	ENSGALG00000015869	9.93792	21.9782	1.14506	2.26205e-07	1.54355e-05
XPC: xeroderma pigmentosum, complementation group C	ENSGALG00000006357	9.14402	19.7274	1.1093	0.00237262	0.0329582
XRCC5: X-ray repair complementing defective repair in Chinese hamster cells 5 (double-strand-break rejoining)	ENSGALG00000011492	18.0884	44.0767	1.28495	1.19405e-05	0.000492324
XRN1: 5'-3' exoribonuclease 1	ENSGALG00000002706	22.2904	55.9172	1.32687	5.45541e-12	1.10707e-09
YAE1D1: Yae1 domain containing 1	ENSGALG00000012306	6.6477	28.5058	2.10033	5.15584e-05	0.0016642
YBX1: Y box binding protein 1	ENSGALG00000004848	286.795	912.466	1.66975	4.40892e-08	3.62292e-06
YME1L1: YME1-like 1 (S. cerevisiae)	ENSGALG00000007492	33.1785	66.5219	1.00358	0.00233083	0.0326071
YPEL1: yippee-like 1	ENSGALG00000021547	20.4894	72.9721	1.83247	0.000691107	0.0131485
YTHDC1: YTH domain containing 1	ENSGALG00000011795	33.5963	72.7199	1.11405	3.41345e-08	2.90729e-06
YTHDC2: YTH domain containing 2	ENSGALG00000000189	10.0973	42.8525	2.08541	1.2657e-07	9.14479e-06
YWHAQ: tyrosine 3-monooxygenase/tryptophan 5-monooxygenase activation protein, theta polypeptide	ENSGALG00000016433	430.831	882.524	1.03451	0.000115161	0.00316178
YY1: YY1 transcription factor	ENSGALG00000017388	6.90199	28.1316	2.02711	0.000638201	0.0123833
ZAK: sterile alpha motif and leucine zipper containing kinase AZK	ENSGALG00000009344	4.28083	9.87284	1.20557	0.00309727	0.0393045
ZBTB34: zinc finger and BTB domain containing 34	ENSGALG00000023407	3.46849	16.2943	2.23199	8.29793e-05	0.00242364
ZBTB41: zinc finger and BTB domain containing 41	ENSGALG00000002305	12.707	31.6811	1.318	0.000100934	0.00284826
ZBTB44: zinc finger and BTB domain containing 44	ENSGALG00000001341	22.1339	47.4723	1.10083	0.00232238	0.0325833
ZBTB8A: zinc finger and BTB domain containing 8A	ENSGALG00000003420	4.02628	12.0592	1.58261	6.52481e-05	0.00203026
ZC3H12B: zinc finger CCCH-type containing 12B	ENSGALG00000004715	11.6975	23.4391	1.00271	0.00219824	0.0313728
ZC3H13: zinc finger CCCH-type containing 13	ENSGALG00000016984	126.927	255.894	1.01154	1.33707e-09	1.568e-07
ZC3H7A: zinc finger CCCH-type containing 7A	ENSGALG00000003143	23.4346	56.4306	1.26784	5.24079e-11	8.43477e-09
ZCCHC24: zinc finger, CCHC domain containing 24	ENSGALG00000004803	37.6493	120.865	1.6827	0.00167247	0.0258995
ZCCHC6: zinc finger, CCHC domain containing 6	ENSGALG00000012607	10.9102	25.387	1.21842	1.26787e-13	3.48099e-11
ZDHHC20: zinc finger, DHHC-type containing 20	ENSGALG00000017126	28.6918	69.1388	1.26886	1.6943e-06	8.86543e-05
ZDHHC21: zinc finger, DHHC domain containing 21	ENSGALG00000005437	3.65435	12.5331	1.77806	9.94432e-05	0.00280957
ZFAND6: zinc finger, AN1-type domain 6	ENSGALG00000006505	9.28117	21.5853	1.21767	4.28759e-05	0.00142535
ZFP106: zinc finger protein 106 homolog	ENSGALG00000009081	11.7074	23.968	1.03368	8.36331e-05	0.00243057
ZFP85:zinc finger protein 85	ENSGALG00000000346	8.85577	20.8522	1.23551	0.000790278	0.0145447
ZFYVE16: zinc finger, FYVE domain containing 16	ENSGALG00000006974	66.8502	162.295	1.27961	0.00430117	0.0486341
ZFYVE16: zinc finger, FYVE domain containing 16	ENSGALG00000015576	9.36513	22.7399	1.27986	2.33147e-14	7.2546e-12
ZFYVE19: zinc finger, FYVE domain containing 19	ENSGALG00000008460	10.6072	26.8407	1.33938	0.000390875	0.00854907
ZMYM2: zinc finger, MYM-type 2	ENSGALG00000017139	23.9551	76.6153	1.6773	0	0
ZNF238: zinc finger protein 238	ENSGALG00000010705	6.29814	49.4681	2.9735	7.94357e-06	0.000343932
ZNF326: zinc finger protein 326	ENSGALG00000006113	45.696	117.204	1.35888	0.00108557	0.0188496
ZNF512: zinc finger protein 512	ENSGALG00000016506	20.4342	48.6622	1.25182	3.72063e-05	0.00127501
ZNF592: zinc finger protein 592	ENSGALG00000002471	11.2072	24.5674	1.13232	0.00244989	0.0336907
ZNF622: zinc finger protein 622	ENSGALG00000022938	9.36683	32.1423	1.77884	5.30879e-05	0.00169714
ZRANB1: zinc finger, RAN-binding domain containing 1	ENSGALG00000023401	14.1734	29.5992	1.06237	0.000523533	0.0106612
ZRANB2: zinc finger, RAN-binding domain containing 2	ENSGALG00000011340	11.9746	38.8401	1.69757	0	0
