# Supplementary material for: Transcriptome analysis reveals novel players in the cranial neural crest gene regulatory network
Source: HighWire-hosted journal article supplement (doi:10.1101/gr.161182.113), 2014-01-03
Supplement: Supplemental_Table2.xlsx [file Supplemental_Table2.xlsx]

## Sheet: Sheet1
GeneName	Description	EnsemblGeneId	GFP-	GFP+	log2(fold_change)	p_value	q_value
A4ZZA2_CHICK	Leucine-rich repeat neuronal 1Uncharacterized protein [Source:UniProtKB/TrEMBL;Acc:A4ZZA2]	ENSGALG00000008279	410.966	144.515	1.5078	0.00169557	0.0260669
ABLIM1	actin binding LIM protein 1 [Source:HGNC Symbol;Acc:78]	ENSGALG00000009048	65.4081	30.0366	1.12275	0.00214016	0.0308112
ACTN2_CHICK	Alpha-actinin-2 [Source:UniProtKB/Swiss-Prot;Acc:P20111]	ENSGALG00000014463	17.296	4.20273	2.04104	2.55615e-05	0.000960593
ADAM19	ADAM metallopeptidase domain 19 [Source:HGNC Symbol;Acc:197]	ENSGALG00000003744	5.49739	1.30976	2.06944	0.00229737	0.0324145
ADAMTS3	ADAM metallopeptidase with thrombospondin type 1 motif, 3 [Source:HGNC Symbol;Acc:219]	ENSGALG00000011623	19.3737	4.76633	2.02315	1.03365e-06	5.84077e-05
AGPAT2	1-acylglycerol-3-phosphate O-acyltransferase 2 (lysophosphatidic acid acyltransferase, beta) [Source:HGNC Symbol;Acc:325]	ENSGALG00000023517	14.2749	2.00596	2.83112	2.39512e-06	0.000118925
AGR2	anterior gradient 2 homolog (Xenopus laevis) [Source:HGNC Symbol;Acc:328]	ENSGALG00000010825	7.16578	0.250824	4.83638	0.00147936	0.0235016
ALCAM	activated leukocyte cell adhesion molecule [Source:RefSeq peptide;Acc:NP_990510]	ENSGALG00000015348	45.5503	19.5173	1.22271	1.24265e-07	9.00615e-06
ALDH1A2	aldehyde dehydrogenase 1 family, member A2 [Source:RefSeq peptide;Acc:NP_990326]	ENSGALG00000004270	13.019	0.711495	4.19362	1.6968e-05	0.000667762
ALDH1A2	aldehyde dehydrogenase 1 family, member A2 [Source:RefSeq peptide;Acc:NP_990326]	ENSGALG00000004270	27.1184	1.92022	3.81993	1.59801e-07	1.13352e-05
ANF_CHICK	Natriuretic peptides AAtrial natriuretic factor [Source:UniProtKB/Swiss-Prot;Acc:P18908]	ENSGALG00000004574	35.097	4.66613	2.91105	0.000654219	0.0126074
APCD1_CHICK	Protein APCDD1 [Source:UniProtKB/Swiss-Prot;Acc:Q5R2I8]	ENSGALG00000000894	23.6827	3.74555	2.66058	0	0
APOH	apolipoprotein H (beta-2-glycoprotein I) [Source:HGNC Symbol;Acc:616]	ENSGALG00000003957	6.19885	0.849888	2.86666	0.00212598	0.0307368
APOLD1	apolipoprotein L domain containing 1 [Source:HGNC Symbol;Acc:25268]	ENSGALG00000011784	13.6618	1.19279	3.51774	0.00144969	0.0230931
ARHGEF9	Cdc42 guanine nucleotide exchange factor (GEF) 9 [Source:HGNC Symbol;Acc:14561]	ENSGALG00000007608	9.10989	1.25652	2.858	0.00140623	0.0226024
B4GALNT3	beta-1,4-N-acetyl-galactosaminyl transferase 3 [Source:HGNC Symbol;Acc:24137]	ENSGALG00000012988	8.21131	1.2967	2.66277	0.000167873	0.00430986
BEND7	BEN domain containing 7 [Source:HGNC Symbol;Acc:23514]	ENSGALG00000006682	12.7015	8.13247	0.643228	0.000732243	0.0137587
BNC1	basonuclin 1 [Source:HGNC Symbol;Acc:1081]	ENSGALG00000006041	7.51385	0.492241	3.93211	2.24336e-05	0.000855447
BNC2	basonuclin 2 [Source:HGNC Symbol;Acc:30988]	ENSGALG00000015101	18.1711	4.90571	1.88911	0.00287477	0.0373404
C11orf9	chromosome 11 open reading frame 9 [Source:HGNC Symbol;Acc:1181]	ENSGALG00000020522	15.8919	6.11058	1.37891	1.55431e-15	5.85048e-13
CADH2_CHICK	Cadherin-2 [Source:UniProtKB/Swiss-Prot;Acc:P10288]	ENSGALG00000015132	91.4602	27.6059	1.72817	0.000467077	0.00976718
CAH2_CHICK	Carbonic anhydrase 2 [Source:UniProtKB/Swiss-Prot;Acc:P07630]	ENSGALG00000015862	63.6804	9.72333	2.71133	4.64448e-06	0.000213784
CALD1	caldesmon 1 [Source:RefSeq peptide;Acc:NP_989489]	ENSGALG00000013071	20.567	9.30605	1.14409	7.70079e-05	0.00228934
CASS4	Cas scaffolding protein family member 4 [Source:HGNC Symbol;Acc:15878]	ENSGALG00000007744	7.92837	1.95278	2.02149	3.70037e-06	0.000176236
CCDC48	coiled-coil domain containing 48 [Source:HGNC Symbol;Acc:25692]	ENSGALG00000005024	10.5804	2.39895	2.14091	5.17979e-05	0.00166728
CCDC85C	coiled-coil domain containing 85C [Source:HGNC Symbol;Acc:35459]	ENSGALG00000011139	84.0544	17.5928	2.25634	9.01161e-06	0.000382233
CHGB	chromogranin B (secretogranin 1) [Source:HGNC Symbol;Acc:1930]	ENSGALG00000009155	25.4035	4.71524	2.42962	4.25959e-05	0.00141806
CHST15	carbohydrate (N-acetylgalactosamine 4-sulfate 6-O) sulfotransferase 15 [Source:HGNC Symbol;Acc:18137]	ENSGALG00000009704	66.8534	9.59755	2.80026	5.61409e-10	7.00621e-08
CILP	cartilage intermediate layer protein, nucleotide pyrophosphohydrolase [Source:HGNC Symbol;Acc:1980]	ENSGALG00000007358	5.57876	1.06591	2.38786	0.00330399	0.040793
CNKSR2	connector enhancer of kinase suppressor of Ras 2 [Source:HGNC Symbol;Acc:19701]	ENSGALG00000016391	11.9048	1.29536	3.20012	0.0010607	0.0185005
COL6A3	collagen, type VI, alpha 3 [Source:RefSeq peptide;Acc:NP_990865]	ENSGALG00000003923	14.0891	2.58766	2.44486	0.00015543	0.00404829
COLEC12	collectin sub-family member 12 [Source:RefSeq peptide;Acc:NP_001034688]	ENSGALG00000014910	105.361	21.3758	2.30129	6.81576e-08	5.28436e-06
CPZ	carboxypeptidase Z [Source:RefSeq peptide;Acc:NP_989909]	ENSGALG00000015597	10.7702	5.20639	1.04869	0.00335125	0.0411189
CUBN	cubilin (intrinsic factor-cobalamin receptor) [Source:HGNC Symbol;Acc:2548]	ENSGALG00000008704	13.2898	0.545541	4.60649	6.37908e-06	0.000284036
CXorf36	chromosome X open reading frame 36 [Source:HGNC Symbol;Acc:25866]	ENSGALG00000016215	16.359	1.98508	3.04282	2.09969e-06	0.000106292
DAB2	disabled homolog 2, mitogen-responsive phosphoprotein (Drosophila) [Source:HGNC Symbol;Acc:2662]	ENSGALG00000003803	60.1526	0.369166	7.34821	1.75526e-12	3.97695e-10
DBNDD2	dysbindin (dystrobrevin binding protein 1) domain containing 2 [Source:HGNC Symbol;Acc:15881]	ENSGALG00000003921	29.1072	10.4664	1.47562	0.000450592	0.00949934
DCN	decorin [Source:HGNC Symbol;Acc:2705]	ENSGALG00000011274	19.6569	2.40689	3.02979	2.95319e-14	8.95048e-12
DLL1	delta-like 1 [Source:RefSeq peptide;Acc:NP_990304]	ENSGALG00000011182	20.8445	2.30931	3.17414	2.91532e-09	3.16441e-07
DNAJB13	DnaJ (Hsp40) homolog, subfamily B, member 13 [Source:HGNC Symbol;Acc:30718]	ENSGALG00000017317	14.3014	0.595921	4.58489	0.0024883	0.0340527
DUSP8	dual specificity phosphatase 8 [Source:HGNC Symbol;Acc:3074]	ENSGALG00000006647	12.1626	4.42573	1.45846	0.000183417	0.00462246
E1BQM6_CHICK	Uncharacterized protein [Source:UniProtKB/TrEMBL;Acc:E1BQM6]	ENSGALG00000001276	100.997	0	1.79769e+308	1.14552e-06	6.33486e-05
E1BR48_CHICK	Uncharacterized protein [Source:UniProtKB/TrEMBL;Acc:E1BR48]	ENSGALG00000008154	38.3891	26.2065	0.550772	0.00308416	0.0392021
E1BS07_CHICK	Uncharacterized protein [Source:UniProtKB/TrEMBL;Acc:E1BS07]	ENSGALG00000003965	22.5578	6.47484	1.80071	2.32701e-05	0.000880153
E1BUB0_CHICK	Uncharacterized protein [Source:UniProtKB/TrEMBL;Acc:E1BUB0]	ENSGALG00000015673	43.6145	24.9926	0.803311	1.56566e-08	1.41073e-06
E1BVB4_CHICK	Friend leukemia virus integration 1 [Source:RefSeq peptide;Acc:NP_001026079]	ENSGALG00000001161	39.4634	10.5341	1.90544	9.23324e-10	1.09937e-07
E1C4G2_CHICK	Uncharacterized protein [Source:UniProtKB/TrEMBL;Acc:E1C4G2]	ENSGALG00000010664	18.3677	5.28937	1.796	3.75326e-05	0.00128431
E1C619_CHICK	Uncharacterized protein [Source:UniProtKB/TrEMBL;Acc:E1C2W8]	ENSGALG00000015433	6.23682	0.963752	2.69408	0.00104325	0.018237
E1C7F6_CHICK	Uncharacterized protein [Source:UniProtKB/TrEMBL;Acc:E1C7F6]	ENSGALG00000007656	15.2383	0.589123	4.69299	5.03819e-13	1.278e-10
E1C7H6_CHICK	Uncharacterized protein [Source:UniProtKB/TrEMBL;Acc:E1C7H6]	ENSGALG00000003015	19.437	8.50932	1.19169	0.00210011	0.0304535
E1C7Q9_CHICK	hypothetical protein LOC416008 [Source:RefSeq peptide;Acc:NP_001029987]	ENSGALG00000005688	6.78169	0.624061	3.44189	0.00192002	0.0285217
E1C8I0_CHICK	Uncharacterized protein [Source:UniProtKB/TrEMBL;Acc:E1C8I0]	ENSGALG00000011077	10.8779	0	1.79769e+308	1.27378e-06	6.96166e-05
E1C968_CHICK	Uncharacterized protein [Source:UniProtKB/TrEMBL;Acc:E1C968]	ENSGALG00000004841	8.29387	0.691376	3.5845	0.000151476	0.00397685
ELMO1	hypothetical protein LOC420735 [Source:RefSeq peptide;Acc:NP_001026165]	ENSGALG00000012093	18.4106	5.75289	1.67818	0.000144455	0.00384396
ELTD1	EGF, latrophilin and seven transmembrane domain containing 1 [Source:HGNC Symbol;Acc:20822]	ENSGALG00000008890	19.0753	0.524506	5.1846	2.62798e-09	2.8793e-07
EMILIN2	elastin microfibril interfacer 2 [Source:HGNC Symbol;Acc:19881]	ENSGALG00000014815	15.1038	4.10412	1.87976	2.07072e-05	0.000796119
EMP1	epithelial membrane protein 1 [Source:HGNC Symbol;Acc:3333]	ENSGALG00000011803	15.7354	1.17756	3.74015	0.000164258	0.00423569
ENG	endoglin [Source:HGNC Symbol;Acc:3349]	ENSGALG00000005060	24.2819	5.60101	2.11612	4.0591e-07	2.58817e-05
ENPP3	ectonucleotide pyrophosphatase/phosphodiesterase 3 [Source:HGNC Symbol;Acc:3358]	ENSGALG00000002869	7.78821	1.95422	1.9947	0.00233832	0.0326397
EPHA3	EPH receptor A3 [Source:RefSeq peptide;Acc:NP_990761]	ENSGALG00000015403	23.3497	6.12517	1.93058	1.55876e-07	1.10905e-05
EPHA5	EPH receptor A5 [Source:RefSeq peptide;Acc:NP_990436]	ENSGALG00000011680	7.47991	2.05692	1.86253	0.000127381	0.0034446
EPS8	epidermal growth factor receptor pathway substrate 8 [Source:HGNC Symbol;Acc:3420]	ENSGALG00000013091	11.9198	4.44135	1.42429	3.16269e-05	0.00114431
ERG_CHICK	Transcriptional regulator Erg [Source:UniProtKB/Swiss-Prot;Acc:Q90837]	ENSGALG00000016058	69.1898	34.3762	1.00915	0.00409599	0.0471807
F1N9R6_CHICK	Uncharacterized protein [Source:UniProtKB/TrEMBL;Acc:F1N9R6]	ENSGALG00000000713	35.3675	16.892	1.06609	3.65677e-05	0.00126347
F1NC99_CHICK	Uncharacterized protein [Source:UniProtKB/TrEMBL;Acc:F1NC99]	ENSGALG00000003888	8.05165	0	1.79769e+308	0.00406241	0.0469937
F1NCD2_CHICK	Uncharacterized protein [Source:UniProtKB/TrEMBL;Acc:F1NCD2]	ENSGALG00000011137	26.6754	8.82542	1.59577	0.00153301	0.0241703
F1NE14_CHICK	Uncharacterized protein [Source:UniProtKB/TrEMBL;Acc:F1NE14]	ENSGALG00000019640	28.5155	0	1.79769e+308	0.00219933	0.0313728
F1NEI7_CHICK	fms-related tyrosine kinase 1 (vascular endothelial growth factor/vascular permeability factor receptor) [Source:RefSeq peptide;Acc:NP_989583]	ENSGALG00000017091	33.0212	5.36326	2.62221	2.49864e-09	2.77671e-07
F1NEQ7_CHICK	paired box gene 2 [Source:RefSeq peptide;Acc:NP_990124]	ENSGALG00000005689	30.7328	9.89519	1.63498	1.92473e-10	2.65784e-08
F1NES3_CHICK	probox protein [Source:RefSeq peptide;Acc:NP_990583]	ENSGALG00000006778	14.4652	1.49037	3.27884	5.16385e-05	0.00166449
F1NEY9_CHICK	alpha 1 globin [Source:RefSeq peptide;Acc:NP_001004376]	ENSGALG00000007468	57.8265	0	1.79769e+308	0.000724009	0.0136402
F1NHM4_CHICK	caudal type homeo box transcription factor 4 [Source:RefSeq peptide;Acc:NP_989945]	ENSGALG00000007657	16.9239	0.278122	5.9272	3.38375e-10	4.41154e-08
F1NKN2_CHICK	Uncharacterized protein [Source:UniProtKB/TrEMBL;Acc:F1NKN2]	ENSGALG00000007646	61.4798	2.32348	4.72575	1.81144e-12	4.06477e-10
F1NM51_CHICK	Uncharacterized protein [Source:UniProtKB/TrEMBL;Acc:F1NM51]	ENSGALG00000007522	7.47007	2.99027	1.32085	0.00221628	0.0314539
F1NMG4_CHICK	homeobox protein [Source:RefSeq peptide;Acc:NP_001025517]	ENSGALG00000011055	12.5282	0.121473	6.6884	0.000648871	0.0125353
F1NMK4_CHICK	wingless-type MMTV integration site family, member 5B [Source:RefSeq peptide;Acc:NP_001032346]	ENSGALG00000012998	21.9225	4.56532	2.26362	6.79634e-05	0.00208967
F1NMZ3_CHICK	Uncharacterized protein [Source:UniProtKB/TrEMBL;Acc:E1C4Q5]	ENSGALG00000017347	292.2	2.23447	7.03088	2.2915e-13	6.00862e-11
F1NN29_CHICK	cytoglobin [Source:RefSeq peptide;Acc:NP_001008789]	ENSGALG00000001892	49.1919	9.11159	2.43265	0.000555211	0.0111697
F1NNP7_CHICK	Uncharacterized protein [Source:UniProtKB/TrEMBL;Acc:F1NNP7]	ENSGALG00000010461	20.7409	8.30619	1.32022	0.00121931	0.0203112
F1NRI8_CHICK	Uncharacterized protein [Source:UniProtKB/TrEMBL;Acc:F1NRI8]	ENSGALG00000005519	6.668	0.47382	3.81484	7.84024e-05	0.00232192
F1NRN6_CHICK	Uncharacterized protein [Source:UniProtKB/TrEMBL;Acc:E1BTB8]	ENSGALG00000008774	60.6462	7.44456	3.02616	4.61517e-09	4.83075e-07
F1NRT3_CHICK	gap junction protein, alpha 5, 40kDa (connexin 40) [Source:RefSeq peptide;Acc:NP_990835]	ENSGALG00000015487	5.58116	0.164387	5.0854	3.66539e-06	0.000174927
F1NTD3_CHICK	bone morphogenetic protein receptor, type IB [Source:RefSeq peptide;Acc:NP_990463]	ENSGALG00000012216	11.5481	3.30498	1.80494	2.64017e-05	0.000987399
F1NU61_CHICK	Uncharacterized protein [Source:UniProtKB/TrEMBL;Acc:F1NDM0]	ENSGALG00000015164	19.3356	3.42683	2.49631	6.02255e-05	0.0018993
F1NUT7_CHICK	Uncharacterized protein [Source:UniProtKB/TrEMBL;Acc:E1BRI6]	ENSGALG00000000317	16.0329	3.64574	2.13675	7.88192e-07	4.61003e-05
F1NVB5_CHICK	nuclear receptor subfamily 5, group A, member 2 [Source:RefSeq peptide;Acc:NP_990409]	ENSGALG00000002182	7.85798	1.63755	2.26262	0.00279763	0.0367407
F1NW72_CHICK	Uncharacterized protein [Source:UniProtKB/TrEMBL;Acc:F1NW72]	ENSGALG00000011581	74.7789	6.92065	3.43365	0	0
F1NXV9_CHICK	transglutaminase 2 (C polypeptide, protein-glutamine-gamma-glutamyltransferase) [Source:RefSeq peptide;Acc:NP_990779]	ENSGALG00000006775	5.31803	0.76343	2.80033	0.00276038	0.0363949
F1NYX5_CHICK	plasminogen activator, urokinase [Source:RefSeq peptide;Acc:NP_990774]	ENSGALG00000005086	9.89307	2.37643	2.05762	0.00329637	0.0407668
F1NZJ3_CHICK	Uncharacterized protein [Source:UniProtKB/TrEMBL;Acc:F1NZJ3]	ENSGALG00000023419	13.2338	0.229902	5.84707	7.10543e-15	2.43852e-12
F1P1Y9_CHICK	cadherin 5, type 2, VE-cadherin (vascular epithelium) [Source:RefSeq peptide;Acc:NP_989558]	ENSGALG00000005272	93.448	8.53505	3.45269	2.77882e-09	3.03035e-07
F1P559_CHICK	Meis1, myeloid ecotropic viral integration site 1 homolog 2 [Source:RefSeq peptide;Acc:NP_990134]	ENSGALG00000009799	98.6934	21.1404	2.22295	4.21951e-12	8.63779e-10
F1P594_CHICK	homeo box B3 [Source:RefSeq peptide;Acc:NP_990074]	ENSGALG00000013455	20.8593	0	1.79769e+308	2.59452e-14	7.96689e-12
F2RL2	coagulation factor II (thrombin) receptor-like 2 [Source:HGNC Symbol;Acc:3539]	ENSGALG00000023379	63.0817	5.54707	3.50742	5.89043e-07	3.62704e-05
FARP1	FERM, RhoGEF (ARHGEF) and pleckstrin domain protein 1 (chondrocyte-derived) [Source:HGNC Symbol;Acc:3591]	ENSGALG00000016886	64.8815	43.0028	0.593376	8.48367e-06	0.000362607
FGD5	FYVE, RhoGEF and PH domain containing 5 [Source:HGNC Symbol;Acc:19117]	ENSGALG00000008546	24.3742	18.63	0.38773	0.000150898	0.00397462
FGF3_CHICK	Fibroblast growth factor 3 [Source:UniProtKB/Swiss-Prot;Acc:P48801]	ENSGALG00000007563	5.19702	0.458692	3.50209	2.15422e-05	0.000825501
FMOD	fibromodulin [Source:RefSeq peptide;Acc:NP_990298]	ENSGALG00000003546	5.40372	0.88617	2.6083	0.00332142	0.0408973
FN1	fibronectin 1 [Source:HGNC Symbol;Acc:3778]	ENSGALG00000003578	274.957	133.892	1.03814	0.00130739	0.0214109
FOXC2	forkhead box C2 (MFH-1, mesenchyme forkhead 1) [Source:HGNC Symbol;Acc:3801]	ENSGALG00000022940	12.4033	1.43034	3.1163	0.000226518	0.00547925
FOXP4	forkhead box P4 [Source:HGNC Symbol;Acc:20842]	ENSGALG00000003375	76.8641	18.4308	2.06019	3.5599e-08	3.021e-06
GATA4_CHICK	Transcription factor GATA-4 [Source:UniProtKB/Swiss-Prot;Acc:P43691]	ENSGALG00000016662	14.6495	0.181506	6.33469	0	0
GATA5	GATA binding protein 5 [Source:RefSeq peptide;Acc:NP_990752]	ENSGALG00000005352	13.4962	0.163999	6.36273	0.000415624	0.00892768
GDPD5	glycerophosphodiester phosphodiesterase domain containing 5 [Source:RefSeq peptide;Acc:NP_001032348]	ENSGALG00000017331	9.33591	3.75883	1.3125	0.000606529	0.0119046
GFRA1	GDNF family receptor alpha 1 [Source:RefSeq peptide;Acc:NP_990433]	ENSGALG00000009173	106.286	33.943	1.64676	3.25673e-05	0.00116296
GNG10	guanine nucleotide binding protein (G protein), gamma 10 [Source:HGNC Symbol;Acc:4402]	ENSGALG00000015683	35.8982	7.81837	2.19897	0.000617388	0.0120543
GPR144	G protein-coupled receptor 144 [Source:HGNC Symbol;Acc:18651]	ENSGALG00000001094	5.38053	0.558476	3.26818	0.000136274	0.00365964
GREB1	growth regulation by estrogen in breast cancer 1 [Source:HGNC Symbol;Acc:24885]	ENSGALG00000016455	108.138	65.2921	0.72789	0.00232329	0.0325833
GRIP1	glutamate receptor interacting protein 1 [Source:HGNC Symbol;Acc:18708]	ENSGALG00000009895	19.104	11.0803	0.785877	0.000795891	0.0146058
HBAD_CHICK	Hemoglobin subunit alpha-D [Source:UniProtKB/Swiss-Prot;Acc:P02001]	ENSGALG00000007463	39.0489	0	1.79769e+308	2.31689e-06	0.00011581
HBPI_CHICK	Hemoglobin subunit pi [Source:UniProtKB/Swiss-Prot;Acc:P02007]	ENSGALG00000023740	100.183	0.642894	7.28384	3.38076e-05	0.00119722
HBRH_CHICK	Hemoglobin subunit beta [Source:UniProtKB/Swiss-Prot;Acc:P02112]	ENSGALG00000017345	170.775	1.41033	6.91992	8.22425e-06	0.000352811
HEG1	HEG homolog 1 (zebrafish) [Source:HGNC Symbol;Acc:29227]	ENSGALG00000011813	69.4205	17.5547	1.9835	2.23173e-06	0.000112481
HOXA3	homeobox A3 [Source:RefSeq peptide;Acc:NP_989879]	ENSGALG00000011054	14.4833	0.0816145	7.47135	3.27415e-09	3.52115e-07
HOXA7	homeobox A7 [Source:RefSeq peptide;Acc:NP_989926]	ENSGALG00000011061	65.4219	0	1.79769e+308	0.000392028	0.00855823
HOXB7	homeobox B7 [Source:HGNC Symbol;Acc:5118]	ENSGALG00000013215	46.4071	2.19318	4.40325	0.00019069	0.0047697
HXB4_CHICK	Homeobox protein Hox-B4 [Source:UniProtKB/Swiss-Prot;Acc:P14840]	ENSGALG00000000284	31.6159	0	1.79769e+308	0.00406241	0.0469937
JAG2	jagged 2 [Source:HGNC Symbol;Acc:6189]	ENSGALG00000011696	7.59413	3.59558	1.07866	0.000203401	0.00503904
JPH1	junctophilin 1 [Source:HGNC Symbol;Acc:14201]	ENSGALG00000015653	15.5406	4.99828	1.63654	1.55239e-06	8.21497e-05
KCNS3	potassium voltage-gated channel, delayed-rectifier, subfamily S, member 3 [Source:HGNC Symbol;Acc:6302]	ENSGALG00000016470	12.5827	0.411277	4.93518	6.20279e-05	0.00194041
KERA_CHICK	Keratocan [Source:UniProtKB/Swiss-Prot;Acc:O42235]	ENSGALG00000011270	21.8978	0.740298	4.88654	9.06013e-09	8.85938e-07
KIAA1217	KIAA1217 [Source:HGNC Symbol;Acc:25428]	ENSGALG00000007766	11.1485	6.5382	0.769879	7.63259e-07	4.48669e-05
KIAA1324L	KIAA1324-like [Source:HGNC Symbol;Acc:21945]	ENSGALG00000006606	6.81123	1.97901	1.78313	0.000279027	0.00655757
KIAA1462	KIAA1462 [Source:HGNC Symbol;Acc:29283]	ENSGALG00000007346	57.4364	13.6162	2.07664	7.17204e-14	2.04115e-11
KLHL4	kelch-like 4 (Drosophila) [Source:HGNC Symbol;Acc:6355]	ENSGALG00000006877	16.5213	3.19941	2.36845	0.00072418	0.0136402
LGR5	leucine-rich repeat containing G protein-coupled receptor 5 [Source:HGNC Symbol;Acc:4504]	ENSGALG00000010163	19.932	6.87384	1.5359	0.000121472	0.00330012
LMO7	LIM domain 7 [Source:HGNC Symbol;Acc:6646]	ENSGALG00000016920	148.704	20.2067	2.87954	0.0015958	0.0248938
LMOD2	leiomodin 2 (cardiac) [Source:HGNC Symbol;Acc:6648]	ENSGALG00000008805	6.34125	0.418392	3.92184	6.61168e-05	0.00204738
LRIG3	leucine-rich repeats and immunoglobulin-like domains 3 [Source:HGNC Symbol;Acc:30991]	ENSGALG00000009755	32.3074	9.42958	1.7766	0.000874553	0.0157142
LRRC32	leucine rich repeat containing 32 [Source:HGNC Symbol;Acc:4161]	ENSGALG00000000818	7.91922	0.948309	3.06193	0.000472708	0.00984668
LRRN4	leucine rich repeat neuronal 4 [Source:HGNC Symbol;Acc:16208]	ENSGALG00000008815	26.1157	10.0252	1.38129	0.000283774	0.00661582
LUM_CHICK	Lumican [Source:UniProtKB/Swiss-Prot;Acc:P51890]	ENSGALG00000011271	37.3978	5.292	2.82107	2.36745e-05	0.000891115
MAN1C1	mannosidase, alpha, class 1C, member 1 [Source:HGNC Symbol;Acc:19080]	ENSGALG00000001038	17.7823	9.43964	0.913637	0.00169088	0.0260486
MAP1B	microtubule-associated protein 1B [Source:HGNC Symbol;Acc:6836]	ENSGALG00000014999	72.1495	32.5995	1.14614	9.444e-07	5.40183e-05
MECOM	MDS1 and EVI1 complex locus [Source:HGNC Symbol;Acc:3498]	ENSGALG00000009437	32.0866	5.42803	2.56347	1.95448e-11	3.50859e-09
METTL20	methyltransferase like 20 [Source:HGNC Symbol;Acc:28739]	ENSGALG00000012939	7.81874	1.79676	2.12154	0.00285842	0.037228
MICAL2	microtubule associated monoxygenase, calponin and LIM domain containing 2 [Source:HGNC Symbol;Acc:24693]	ENSGALG00000005540	9.69569	1.74654	2.47284	9.22537e-06	0.000390023
MMP2_CHICK	72 kDa type IV collagenase [Source:UniProtKB/Swiss-Prot;Acc:Q90611]	ENSGALG00000003580	19.8388	5.03156	1.97925	0.000915872	0.0163408
MMRN1	multimerin 1 [Source:HGNC Symbol;Acc:7178]	ENSGALG00000010391	9.61567	0.150955	5.9932	3.63996e-05	0.00126219
MSGN1_CHICK	Mesogenin-1 [Source:UniProtKB/Swiss-Prot;Acc:Q9DEQ9]	ENSGALG00000016469	12.2213	1.27369	3.26232	7.00146e-05	0.00211575
MXRA5	matrix-remodelling associated 5 [Source:HGNC Symbol;Acc:7539]	ENSGALG00000016635	25.8796	2.9013	3.15704	5.6728e-08	4.48766e-06
MYBPC3	myosin binding protein C, cardiac [Source:RefSeq peptide;Acc:NP_990447]	ENSGALG00000008148	7.17611	0.347516	4.36805	4.20176e-08	3.50202e-06
MYCT1	myc target 1 [Source:HGNC Symbol;Acc:23172]	ENSGALG00000013603	171.217	14.2784	3.58392	3.13859e-07	2.08676e-05
MYL2	myosin, light chain 2, regulatory, cardiac, slow [Source:HGNC Symbol;Acc:7583]	ENSGALG00000004582	46.1372	0	1.79769e+308	0.00188194	0.0281531
MYL3	slow skeletal ventricular myosin alkali light chain 3 [Source:RefSeq peptide;Acc:NP_990490]	ENSGALG00000005448	37.5143	0.95906	5.28968	4.56927e-08	3.74151e-06
MYO16	myosin XVI [Source:HGNC Symbol;Acc:29822]	ENSGALG00000016837	6.70291	2.41304	1.47393	3.11865e-08	2.66593e-06
MYOCD	myocardin [Source:HGNC Symbol;Acc:16067]	ENSGALG00000001021	6.84549	0.713891	3.26138	5.3726e-05	0.00171519
NBL1_CHICK	Neuroblastoma suppressor of tumorigenicity 1 [Source:UniProtKB/Swiss-Prot;Acc:Q90YC9]	ENSGALG00000004043	13.6651	2.23881	2.60969	0.000283352	0.00661259
NDNF	neuron-derived neurotrophic factor [Source:HGNC Symbol;Acc:26256]	ENSGALG00000011962	19.803	5.37521	1.88133	0.0027206	0.0361674
NDP	Norrie disease (pseudoglioma) [Source:HGNC Symbol;Acc:7678]	ENSGALG00000016222	6.59252	0	1.79769e+308	0.00321897	0.0401932
NFIB_CHICK	Nuclear factor 1 B-type [Source:UniProtKB/Swiss-Prot;Acc:P17924]	ENSGALG00000005441	9.16152	0.871204	3.3945	6.82431e-05	0.00209551
NRP1	neuropilin 1 [Source:RefSeq peptide;Acc:NP_990113]	ENSGALG00000007140	40.9368	4.72192	3.11595	4.04881e-10	5.1916e-08
O42096_CHICK	Uncharacterized protein [Source:UniProtKB/TrEMBL;Acc:F1NGF6]	ENSGALG00000009089	27.3274	9.15389	1.57789	0.00116178	0.0196941
OIT3	oncoprotein induced transcript 3 [Source:HGNC Symbol;Acc:29953]	ENSGALG00000004345	52.8937	7.07051	2.90321	7.54865e-06	0.000329276
OSR1	odd-skipped related 1 (Drosophila) [Source:HGNC Symbol;Acc:8111]	ENSGALG00000016473	46.3684	0.258628	7.48612	3.01458e-10	3.99724e-08
P79757_CHICK	Connectin/titinUncharacterized protein [Source:UniProtKB/TrEMBL;Acc:P79757]	ENSGALG00000009126	9.67091	1.84712	2.38837	0.000796097	0.0146058
PAPPA	pregnancy-associated plasma protein A, pappalysin 1 [Source:HGNC Symbol;Acc:8602]	ENSGALG00000007079	20.0932	3.88108	2.37218	1.42331e-13	3.83576e-11
PDE3A	phosphodiesterase 3A, cGMP-inhibited [Source:HGNC Symbol;Acc:8778]	ENSGALG00000013143	19.6221	2.34178	3.0668	5.99338e-11	9.38709e-09
PENK	proenkephalin [Source:HGNC Symbol;Acc:8831]	ENSGALG00000015419	5.76917	0.592784	3.28279	0.00206211	0.0300771
PHACTR3	phosphatase and actin regulator 3 [Source:HGNC Symbol;Acc:15833]	ENSGALG00000004873	12.8791	5.56528	1.21051	0.000817932	0.0148893
PITPNM2	phosphatidylinositol transfer protein, membrane-associated 2 [Source:HGNC Symbol;Acc:21044]	ENSGALG00000003645	13.6798	7.56962	0.853753	4.22735e-05	0.00141135
PKP2	plakophilin 2 [Source:HGNC Symbol;Acc:9024]	ENSGALG00000012913	9.84043	1.93426	2.34694	0.000475375	0.00986118
PLEKHH2	pleckstrin homology domain containing, family H (with MyTH4 domain) member 2 [Source:HGNC Symbol;Acc:30506]	ENSGALG00000009947	9.36894	3.83082	1.29023	0.00271381	0.0361261
PLXNA2	plexin A2 [Source:HGNC Symbol;Acc:9100]	ENSGALG00000001264	18.5437	1.43963	3.68716	0	0
PLXND1	plexin D1 [Source:HGNC Symbol;Acc:9107]	ENSGALG00000008473	50.7337	4.05245	3.64608	1.15548e-11	2.21027e-09
POPD1_CHICK	Blood vessel epicardial substance [Source:UniProtKB/Swiss-Prot;Acc:Q9DG23]	ENSGALG00000015410	7.90669	0.955817	3.04827	0.000947843	0.0167956
PPAPDC1A	phosphatidic acid phosphatase type 2 domain containing 1A [Source:HGNC Symbol;Acc:23531]	ENSGALG00000009471	16.5204	4.75445	1.7969	0.0026704	0.0357335
PRCP	prolylcarboxypeptidase (angiotensinase C) [Source:HGNC Symbol;Acc:9344]	ENSGALG00000017247	10.797	6.13349	0.815847	0.000154383	0.00403823
PREX2	phosphatidylinositol-3,4,5-trisphosphate-dependent Rac exchange factor 2 [Source:HGNC Symbol;Acc:22950]	ENSGALG00000015564	48.2679	14.853	1.70031	0.000178231	0.00450984
PRICKLE1	prickle homolog 1 (Drosophila) [Source:HGNC Symbol;Acc:17019]	ENSGALG00000009556	26.4137	11.1019	1.25047	3.62113e-06	0.000173169
PRR5	proline rich 5 (renal) [Source:RefSeq peptide;Acc:NP_001025151]	ENSGALG00000014213	15.9133	7.48093	1.08894	0.00422567	0.0481666
PTN	pleiotrophin [Source:HGNC Symbol;Acc:9630]	ENSGALG00000012893	1089.86	329.11	1.7275	1.25713e-05	0.000515598
PTPRE	protein tyrosine phosphatase, receptor type, E [Source:HGNC Symbol;Acc:9669]	ENSGALG00000009823	8.51381	0.366009	4.53985	0.00111702	0.0192242
PTPRM	protein tyrosine phosphatase, receptor type, M [Source:HGNC Symbol;Acc:9675]	ENSGALG00000013902	18.8316	4.96425	1.92351	7.34956e-07	4.33123e-05
PTPRU	protein tyrosine phosphatase, receptor type, U [Source:RefSeq peptide;Acc:NP_989823]	ENSGALG00000001443	11.1377	1.89577	2.5546	9.02473e-06	0.000382233
Q5ZKV2_CHICK	Uncharacterized protein [Source:UniProtKB/TrEMBL;Acc:E1C222]	ENSGALG00000012944	7.82913	2.54255	1.62257	0.00391335	0.0458777
Q71LH8_CHICK	LIM domain only 2 (rhombotin-like 1) [Source:RefSeq peptide;Acc:NP_989602]	ENSGALG00000000351	41.7318	6.60698	2.65908	7.10872e-06	0.000313603
Q76B59_CHICK	fibroblast growth factor 19 [Source:RefSeq peptide;Acc:NP_990005]	ENSGALG00000007558	24.4615	0.618421	5.30578	1.99096e-07	1.38283e-05
Q8QGU2_CHICK	FK506 binding protein 1B, 12.6 kDa [Source:RefSeq peptide;Acc:NP_989898]	ENSGALG00000016500	11.2854	1.58572	2.83125	0.000534442	0.0108549
Q8QHJ0_CHICK	Dachshund 1Uncharacterized protein [Source:UniProtKB/TrEMBL;Acc:Q8QHJ0]	ENSGALG00000016933	14.0765	3.05616	2.2035	0.00032772	0.00737511
Q8UVD3_CHICK	paired related homeobox 1 [Source:RefSeq peptide;Acc:NP_001007822]	ENSGALG00000003324	11.1496	0.371871	4.90605	4.4051e-05	0.00146025
Q8UVD4_CHICK	Uncharacterized protein [Source:UniProtKB/TrEMBL;Acc:F1P4G3]	ENSGALG00000012792	254.691	78.8097	1.6923	1.21024e-05	0.000498118
Q90717_CHICK	Uncharacterized protein [Source:UniProtKB/TrEMBL;Acc:F1NA51]	ENSGALG00000003135	25.6096	13.1026	0.966829	0.000116758	0.00319938
Q90WD1_CHICK	midline 1 [Source:RefSeq peptide;Acc:NP_989460]	ENSGALG00000016603	25.2843	8.08807	1.64437	9.88239e-06	0.000414049
Q90XG3_CHICK	Uncharacterized protein [Source:UniProtKB/TrEMBL;Acc:F1NHG5]	ENSGALG00000014419	14.3633	5.15242	1.47907	0.000854299	0.015419
Q91377_CHICK	myosin heavy chain 6 [Source:RefSeq peptide;Acc:NP_990097]	ENSGALG00000015358	235.86	10.5822	4.47821	1.74103e-08	1.55672e-06
Q9DEX4_CHICK	periostin, osteoblast specific factor [Source:RefSeq peptide;Acc:NP_001025712]	ENSGALG00000017046	5.14733	0.728903	2.82003	0.000277303	0.00653679
Q9PU40_CHICK	tyrosine hydroxylase [Source:RefSeq peptide;Acc:NP_990136]	ENSGALG00000006551	8.41156	1.50832	2.47943	0.000969393	0.0170866
Q9YI38_CHICK	mesenchyme homeobox 1 [Source:RefSeq peptide;Acc:NP_990096]	ENSGALG00000001191	50.5106	12.1882	2.0511	7.18212e-05	0.00215713
RAI14	retinoic acid induced 14 [Source:HGNC Symbol;Acc:14873]	ENSGALG00000003353	30.7007	14.1319	1.11931	1.03104e-11	1.98855e-09
RAPGEF5	Rap guanine nucleotide exchange factor (GEF) 5 [Source:HGNC Symbol;Acc:16862]	ENSGALG00000010910	10.6932	3.59828	1.57132	0.00217559	0.0311675
RASGRP3	RAS guanyl releasing protein 3 (calcium and DAG-regulated) [Source:RefSeq peptide;Acc:NP_001006401]	ENSGALG00000010435	66.2874	14.2671	2.21604	2.63811e-12	5.70052e-10
RBPMS2	RNA binding protein with multiple splicing 2 [Source:RefSeq peptide;Acc:NP_990200]	ENSGALG00000002355	52.2038	8.90329	2.55174	1.43324e-07	1.02286e-05
RCAN2	regulator of calcineurin 2 [Source:HGNC Symbol;Acc:3041]	ENSGALG00000016709	36.1659	6.82378	2.40599	2.87922e-05	0.00105317
RFX4	regulatory factor X, 4 (influences HLA class II expression) [Source:HGNC Symbol;Acc:9985]	ENSGALG00000012647	14.51	3.23908	2.16339	6.58934e-06	0.000291794
RGCC	regulator of cell cycle [Source:HGNC Symbol;Acc:20369]	ENSGALG00000016954	11.8809	1.12159	3.40503	6.32626e-05	0.00197111
RSPO1	R-spondin 1 [Source:HGNC Symbol;Acc:21679]	ENSGALG00000001946	5.73195	1.45828	1.97476	0.00115831	0.0196747
RSPO3	R-spondin 3 [Source:HGNC Symbol;Acc:20866]	ENSGALG00000014829	17.1902	1.07018	4.00566	1.00072e-05	0.000417033
RUNX1T1	runt-related transcription factor 1; translocated to, 1 (cyclin D-related) [Source:RefSeq peptide;Acc:NP_990075]	ENSGALG00000015926	20.5023	3.32018	2.62645	3.64899e-09	3.90626e-07
SCML2	sex comb on midleg-like 2 (Drosophila) [Source:HGNC Symbol;Acc:10581]	ENSGALG00000016537	43.7768	18.7297	1.22484	0.00421837	0.0481594
SEC16B	leucine zipper transcription regulator 2 [Source:RefSeq peptide;Acc:NP_001026440]	ENSGALG00000004424	5.4432	0.115342	5.56046	0.000475898	0.00986327
SEMA5A	sema domain, seven thrombospondin repeats (type 1 and type 1-like), transmembrane domain (TM) and short cytoplasmic domain, (semaphorin) 5A [Source:HGNC Symbol;Acc:10736]	ENSGALG00000013051	7.8149	2.79641	1.48265	0.000239828	0.00576996
SEMA6A	sema domain, transmembrane domain (TM), and cytoplasmic domain, (semaphorin) 6A [Source:HGNC Symbol;Acc:10738]	ENSGALG00000002294	20.6726	5.78792	1.8366	0.000569596	0.0113322
SH3BGR	SH3 domain binding glutamic acid-rich protein [Source:HGNC Symbol;Acc:10822]	ENSGALG00000016127	20.395	3.11135	2.7126	0.000932991	0.0165828
SHROOM3	shroom family member 3 [Source:HGNC Symbol;Acc:30422]	ENSGALG00000011487	26.4803	6.1114	2.11534	1.39764e-07	1.00052e-05
SIDT1	SID1 transmembrane family, member 1 [Source:HGNC Symbol;Acc:25967]	ENSGALG00000014812	5.02056	1.36484	1.87912	0.00213594	0.0307884
SIM1	single-minded homolog 1 (Drosophila) [Source:HGNC Symbol;Acc:10882]	ENSGALG00000015466	9.90018	1.40592	2.81595	8.87015e-05	0.00254303
SKAP2	src kinase associated phosphoprotein 2 [Source:HGNC Symbol;Acc:15687]	ENSGALG00000011051	51.5697	18.35	1.49074	6.92628e-05	0.0021042
SMOC1	SPARC related modular calcium binding 1 [Source:HGNC Symbol;Acc:20318]	ENSGALG00000009415	12.9187	1.56801	3.04245	0	0
SPNS2	spinster homolog 2 (Drosophila) [Source:HGNC Symbol;Acc:26992]	ENSGALG00000001387	7.70533	0.937953	3.03827	0.00357517	0.042918
STAB1	stabilin 1 [Source:HGNC Symbol;Acc:18628]	ENSGALG00000001535	6.69581	1.12984	2.56714	0.000304872	0.00702448
STAB2	stabilin 2 [Source:HGNC Symbol;Acc:18629]	ENSGALG00000012751	20.9202	1.7265	3.59898	6.03437e-09	6.14952e-07
STRA6	stimulated by retinoic acid gene 6 homolog (mouse) [Source:HGNC Symbol;Acc:30650]	ENSGALG00000001449	28.0713	8.03699	1.80437	2.04411e-06	0.000103929
SYNE2	spectrin repeat containing, nuclear envelope 2 [Source:HGNC Symbol;Acc:17084]	ENSGALG00000011811	292.903	135.753	1.10944	0.000847162	0.0153271
T	T, brachyury homolog [Source:RefSeq peptide;Acc:NP_990271]	ENSGALG00000011489	25.564	1.39328	4.19756	0	0
TBX20_CHICK	T-box transcription factor TBX20 [Source:UniProtKB/Swiss-Prot;Acc:Q8UW76]	ENSGALG00000012151	5.38773	0.573718	3.23126	6.76201e-05	0.00208186
TBX22	T-box 22 [Source:RefSeq peptide;Acc:NP_989437]	ENSGALG00000004093	9.15093	1.94969	2.23067	0.00190416	0.0283525
TBX5_CHICK	T-box transcription factor TBX5 [Source:UniProtKB/Swiss-Prot;Acc:Q9PWE8]	ENSGALG00000008253	7.57733	0	1.79769e+308	2.03677e-10	2.76349e-08
TBX6	T-box 6 [Source:RefSeq peptide;Acc:NP_001025538]	ENSGALG00000006374	16.0279	0.333605	5.5863	1.55431e-15	5.85048e-13
TEK	TEK tyrosine kinase, endothelial [Source:HGNC Symbol;Acc:11724]	ENSGALG00000001840	41.2416	4.84424	3.08976	2.35179e-07	1.59083e-05
TFCP2L1	transcription factor CP2-like 1 [Source:HGNC Symbol;Acc:17925]	ENSGALG00000011635	14.3778	2.6024	2.46593	8.53344e-05	0.00246772
TFPI	tissue factor pathway inhibitor (lipoprotein-associated coagulation inhibitor) [Source:HGNC Symbol;Acc:11760]	ENSGALG00000002594	19.3048	5.37722	1.84403	0.00116863	0.0197532
TFPI2	tissue factor pathway inhibitor 2 [Source:HGNC Symbol;Acc:11761]	ENSGALG00000009512	9.98034	1.26056	2.98502	0.000682705	0.0130379
TGFR2_CHICK	TGF-beta receptor type-2 [Source:UniProtKB/Swiss-Prot;Acc:Q90999]	ENSGALG00000011442	31.8846	5.34475	2.57666	2.88658e-15	1.05256e-12
TIMP3_CHICK	Metalloproteinase inhibitor 3 [Source:UniProtKB/Swiss-Prot;Acc:P26652]	ENSGALG00000012568	36.1582	9.32739	1.95478	0.000480247	0.00993575
TMEM211	transmembrane protein 211 [Source:HGNC Symbol;Acc:33725]	ENSGALG00000023656	7.77037	1.29358	2.58662	0.000389057	0.00851728
TMTC1	transmembrane and tetratricopeptide repeat containing 1 [Source:HGNC Symbol;Acc:24099]	ENSGALG00000012956	5.25861	1.66125	1.66242	6.02186e-07	3.67885e-05
TNNT2	troponin T type 2, cardiac [Source:RefSeq peptide;Acc:NP_990780]	ENSGALG00000000302	15.4762	0.992008	3.96356	1.43639e-05	0.000581961
TRIM55	tripartite motif containing 55 [Source:HGNC Symbol;Acc:14215]	ENSGALG00000015520	9.02095	0.795197	3.5039	0.000484148	0.00998989
TSHZ1	teashirt zinc finger homeobox 1 [Source:HGNC Symbol;Acc:10669]	ENSGALG00000013672	34.3218	2.32249	3.88538	4.28894e-08	3.56196e-06
TTHY_CHICK	Transthyretin [Source:UniProtKB/Swiss-Prot;Acc:P27731]	ENSGALG00000015143	52.3051	1.15238	5.50427	4.89851e-05	0.00159883
UNC5B	unc-5 homolog B [Source:RefSeq peptide;Acc:NP_001026396]	ENSGALG00000004569	28.0961	9.73474	1.52915	0.000188982	0.00473714
WNT11_CHICK	Protein Wnt-11 [Source:UniProtKB/Swiss-Prot;Acc:P49339]	ENSGALG00000000839	10.4848	1.97936	2.4052	1.72555e-05	0.000677933
WNT3A_CHICK	Protein Wnt-3a [Source:UniProtKB/Swiss-Prot;Acc:Q2LMP1]	ENSGALG00000005396	8.47841	0.495171	4.09779	7.66876e-10	9.27285e-08
ZIC1	zinc finger protein of the cerebellum 1 [Source:RefSeq peptide;Acc:NP_989585]	ENSGALG00000006811	8.56668	1.28843	2.73312	4.15563e-06	0.000193573
ZNF827	zinc finger protein 827 [Source:HGNC Symbol;Acc:27193]	ENSGALG00000009982	47.8591	19.674	1.28251	0.000171076	0.00436652
	Uncharacterized	ENSGALG00000005210	13.068	4.12648	1.66305	0	0
	Uncharacterized protein [Source:UniProtKB/TrEMBL;Acc:E1BW55]	ENSGALG00000007458	416.148	1.78458	7.86537	6.97664e-12	1.35678e-09
	Uncharacterized protein [Source:UniProtKB/TrEMBL;Acc:F1NLS1]	ENSGALG00000008629	38.8698	3.09059	3.6527	7.9173e-07	4.61915e-05
	Uncharacterized protein [Source:UniProtKB/TrEMBL;Acc:F1NIY4]	ENSGALG00000008697	7.39055	1.20105	2.62138	0.000439342	0.00932083
	Uncharacterized	ENSGALG00000008856	31.5094	2.262	3.80011	2.32748e-06	0.000116061
	Uncharacterized protein [Source:UniProtKB/TrEMBL;Acc:E1C0Q8]	ENSGALG00000009646	17.8289	0	1.79769e+308	0.0014576	0.0231874
	Uncharacterized protein [Source:UniProtKB/TrEMBL;Acc:F1NAF0]	ENSGALG00000010388	20.1739	2.46197	3.03461	0.00201543	0.0296745
	Uncharacterized	ENSGALG00000011656	13.26	2.99793	2.14505	0.00217126	0.0311437
	Uncharacterized protein [Source:UniProtKB/TrEMBL;Acc:F1NC05]	ENSGALG00000012278	16.7724	2.97433	2.49545	6.01383e-05	0.0018993
	Uncharacterized protein [Source:UniProtKB/TrEMBL;Acc:E1C3U4]	ENSGALG00000012332	18.3061	0	1.79769e+308	0.00307158	0.0391736
	Uncharacterized protein [Source:UniProtKB/TrEMBL;Acc:F1N9Y9]	ENSGALG00000012385	5.51498	0	1.79769e+308	0.000117525	0.00321533
	Uncharacterized	ENSGALG00000013448	16.2634	8.12345	1.00146	0.000566107	0.011292
	Uncharacterized	ENSGALG00000017405	10.1651	1.7073	2.57384	5.18682e-05	0.00166728
	Uncharacterized protein [Source:UniProtKB/TrEMBL;Acc:F1NNZ8]	ENSGALG00000019267	18.8763	5.32684	1.82522	0.00135584	0.0220173
	Uncharacterized protein [Source:UniProtKB/TrEMBL;Acc:E1BVD9]	ENSGALG00000020899	21.5105	5.61624	1.93736	0.000104895	0.00293079
	Uncharacterized protein [Source:UniProtKB/TrEMBL;Acc:F1NTW4]	ENSGALG00000023493	109.58	26.188	2.06501	0.000118414	0.00323346
	Uncharacterized protein [Source:UniProtKB/TrEMBL;Acc:E1BSN5]	ENSGALG00000023826	67.038	10.7953	2.63457	0.00045643	0.00958749
	Uncharacterized protein [Source:UniProtKB/TrEMBL;Acc:E1BQD6]	ENSGALG00000023861	95.1096	12.6306	2.91267	0.000685593	0.0130823
	Uncharacterized protein [Source:UniProtKB/TrEMBL;Acc:F1NWN9]	ENSGALG00000023903	25.6366	4.72262	2.44055	0.00419708	0.0480554
	Uncharacterized	ENSGALG00000023951	19.2463	3.52018	2.45086	0.00365325	0.0436315
	Uncharacterized protein [Source:UniProtKB/TrEMBL;Acc:F1P2H5]	ENSGALG00000023973	1067.51	136.924	2.96281	2.08181e-06	0.000105615
