# Supplementary material for: Transcriptome analysis reveals novel players in the cranial neural crest gene regulatory network
Source: HighWire-hosted journal article supplement (doi:10.1101/gr.161182.113), 2014-01-03
Supplement: Supplemental_Table3.xlsx [file Supplemental_Table3.xlsx]

## Sheet: Sheet1
Gene Name
ACAN: aggrecan
ALX1: ALX homeobox 1
ARHGAP31: Rho GTPase activating protein 31
ATF2: activating transcription factor 2
BLZF1: basic leucine zipper nuclear factor 1
BMPR1A: bone morphogenetic protein receptor, type IA
C1D: C1D nuclear receptor corepressor
Calm1: calmodulin 1
CHCHD3: coiled-coil-helix-coiled-coil-helix domain containing 3
CNBP: CCHC-type zinc finger, nucleic acid binding protein
COL2A1: collagen, type II, alpha 1
COL9A1: collagen, type IX, alpha 1
COL9A3: collagen, type IX, alpha 3
DACT2: dapper, antagonist of beta-catenin, homolog 2
EBF1: early B-cell factor 1
ECD: ecdysoneless homolog (Drosophila)
ETS1: v-ets erythroblastosis virus E26 oncogene homolog 1 (avian)
FBXL3: F-box and leucine-rich repeat protein 3
FRZB: frizzled-related protein
HELLS: helicase, lymphoid-specific
ID2: inhibitor of DNA binding 2, dominant negative helix-loop-helix protein
ITGB3: integrin, beta 3 (platelet glycoprotein IIIa, antigen CD61)
KCTD1: potassium channel tetramerisation domain containing 1
KCTD15: potassium channel tetramerisation domain containing 15
LBH: limb bud and heart development
LHX9: LIM homeobox 9
LIN28:lin-28 homolog
LMO4: LIM domain only 4
LTK: leukocyte receptor tyrosine kinase
MAP3K5: mitogen-activated protein kinase kinase kinase 5
MEF2C: Myocyte-specific enhancer factor 2C
MTPN: myotrophin
MYC: v-myc myelocytomatosis viral oncogene homolog (avian)
MYEF2: myelin expression factor 2
MYO10: myosin X
NFIA: nuclear factor I/A
NKRF: NFKB repressing factor
NOE1: Noelin
OAT: ornithine aminotransferase
OTOGL: otogelin-like
PAX7: paired box 7
PCH2_CHICK: Pachytene checkpoint protein 2 homolog
PRKAR1A: protein kinase, cAMP-dependent, regulatory, type I, alpha
PUM1: pumilio homolog 1 (Drosophila)
RASL11B: RAS-like, family 11, member B
RCOR1: REST corepressor 1
RHOBTB2: Rho-related BTB domain containing 2
RNF144A: ring finger protein 144A
ROBO2: roundabout, axon guidance receptor, homolog 2 (Drosophila)
RRN3: RRN3 RNA polymerase I transcription factor homolog (S. cerevisiae)
SNAI2: snail homolog 2 (Drosophila)
SOX10: SRY (sex determining region Y)-box 10
SOX5: SRY (sex determining region Y)-box 5
SOX8: SRY (sex determining region Y)-box 8
SP3: Sp3 transcription factor
SUB1: SUB1 homolog (S. cerevisiae)
TFAP2A: transcription factor AP-2 alpha (activating enhancer binding protein 2 alpha)
TFAP2B: transcription factor AP-2 beta (activating enhancer binding protein 2 beta)
TWSG1: twisted gastrulation homolog 1 (Drosophila)
UACA: uveal autoantigen with coiled-coil domains and ankyrin repeats
YBX1: Y box binding protein 1
ZBTB34: zinc finger and BTB domain containing 34
ZMYM2: zinc finger, MYM-type 2
ZRANB2: zinc finger, RAN-binding domain containing 2
