# Supplementary material for: Transcriptome analysis reveals novel players in the cranial neural crest gene regulatory network
Source: HighWire-hosted journal article supplement (doi:10.1101/gr.161182.113), 2014-01-03
Supplement: Supplemental_Table4.xlsx [file Supplemental_Table4.xlsx]

## Sheet: Sheet1
Transctiptional Regulator	EnsemblGeneId	log2(fold_change)	Previously Studied in NC
ALX1: ALX homeobox 1	ENSGALG00000011144	3.57378	*
ATF2: activating transcription factor 2	ENSGALG00000009287	1.9332
BLZF1: basic leucine zipper nuclear factor 1	ENSGALG00000015225	1.95966
C1D: C1D nuclear receptor corepressor	ENSGALG00000017119	1.63433
CNBP: CCHC-type zinc finger, nucleic acid binding protein	ENSGALG00000005001	2.33898	*
EBF1: early B-cell factor 1	ENSGALG00000003699	2.58599
ECD: ecdysoneless homolog (Drosophila)	ENSGALG00000002686	1.84952
ETS1: v-ets erythroblastosis virus E26 oncogene homolog 1 (avian)	ENSGALG00000001143	1.88134	*
FBXL3: F-box and leucine-rich repeat protein 3	ENSGALG00000016916	1.9331
FOXD3: forkhead box D3	ENSGALG00000012644	2.19739	*
HDAC2: histone deacetylase 2	ENSGALG00000014991	1.62309	*
ID2: inhibitor of DNA binding 2, dominant negative helix-loop-helix protein	ENSGALG00000016403	2.46302	*
ID4: inhibitor of DNA binding 4, dominant negative helix-loop-helix protein	ENSGALG00000012682	2.02972
KCTD1: potassium channel tetramerisation domain containing 1	ENSGALG00000015124	2.13421
LBH: limb bud and heart development	ENSGALG00000009052	2.10546
LHX9: LIM homeobox 9	ENSGALG00000002223	1.91161
LIN28:lin-28 homolog	ENSGALG00000000388	1.81068
LMO4: LIM domain only 4	ENSGALG00000006252	2.57892	*
MDM2: Mdm2, p53 E3 ubiquitin protein ligase homolog (mouse)	ENSGALG00000009942	1.75576
MED7: mediator complex subunit 7	ENSGALG00000003870	3.00198
MFSD2A: major facilitator superfamily domain containing 2A	ENSGALG00000003879	1.59516
MTPN: myotrophin	ENSGALG00000012895	2.67218
MYC: v-myc myelocytomatosis viral oncogene homolog (avian)	ENSGALG00000016308	1.733
MYEF2: myelin expression factor 2	ENSGALG00000004905	1.94687
NFIA: nuclear factor I/A	ENSGALG00000010924	2.53456
NFYB: nuclear transcription factor Y, beta	ENSGALG00000012717	2.48761
NKRF: NFKB repressing factor	ENSGALG00000008645	1.85268
OAT: ornithine aminotransferase	ENSGALG00000000054	2.5345
PAX7: paired box 7	ENSGALG00000005246	1.82987	*
PCH2_CHICK: Pachytene checkpoint protein 2 homolog	ENSGALG00000012508	2.17113
PTGES2: prostaglandin E synthase 2	ENSGALG00000004779	1.91658
RCOR1: REST corepressor 1	ENSGALG00000011384	1.86767
RNF144A: ring finger protein 144A	ENSGALG00000016401	2.69811
RNF6: ring finger protein (C3H2C3 type) 6	ENSGALG00000017105	1.87087
RPL7L1: ribosomal protein L7-like 1	ENSGALG00000011974	1.79162
RRN3: RRN3 RNA polymerase I transcription factor homolog (S. cerevisiae)	ENSGALG00000002862	1.82818
RUVBL1: RuvB-like 1 (E. coli)	ENSGALG00000005931	1.62455
SNAI2: snail homolog 2 (Drosophila)	ENSGALG00000015241	2.02425	*
SOX10: SRY (sex determining region Y)-box 10	ENSGALG00000012290	3.45926	*
SOX5: SRY (sex determining region Y)-box 5	ENSGALG00000013204	1.74028	*
SOX8: SRY (sex determining region Y)-box 8	ENSGALG00000005263	3.27821	*
SUB1: SUB1 homolog (S. cerevisiae)	ENSGALG00000003248	2.47021
TARBP1: TAR (HIV-1) RNA binding protein 1	ENSGALG00000011000	1.59521
TFAP2A: transcription factor AP-2 alpha (activating enhancer binding protein 2 alpha)	ENSGALG00000012775	2.88971	*
TFAP2B: transcription factor AP-2 beta (activating enhancer binding protein 2 beta)	ENSGALG00000016680	3.98655	*
TNFRSF1A: tumor necrosis factor receptor superfamily, member 1A precursor	ENSGALG00000014890	1.69775
URI1: URI1, prefoldin-like chaperone	ENSGALG00000004506	1.71159
YBX1: Y box binding protein 1	ENSGALG00000004848	1.66975
ZNF238: zinc finger protein 238	ENSGALG00000010705	2.9735
ZRANB2: zinc finger, RAN-binding domain containing 2	ENSGALG00000011340	1.69757
