# Supplementary material for: Transcriptome analysis reveals novel players in the cranial neural crest gene regulatory network
Source: HighWire-hosted journal article supplement (doi:10.1101/gr.161182.113), 2014-01-03
Supplement: Supplemental_Table5.xlsx [file Supplemental_Table5.xlsx]

## Sheet: Library #1
EnsemblGeneId	value_1	value_2	log2(fold_change)
ENSGALG00000000054	9.09534	1.91736	-2.24601
ENSGALG00000000212	10.1123	2.08176	-2.28024
ENSGALG00000000377	695.768	124.531	-2.4821
ENSGALG00000000379	82.4413	13.5507	-2.605
ENSGALG00000000408	10.8038	1.32886	-3.02328
ENSGALG00000000424	31.481	4.59175	-2.77736
ENSGALG00000000439	8.89161	1.13314	-2.97212
ENSGALG00000000452	28.168	1.19605	-4.55771
ENSGALG00000000620	20.661	1.86971	-3.46602
ENSGALG00000000663	78.4684	18.3332	-2.09765
ENSGALG00000000742	7.3026	1.77668	-2.03923
ENSGALG00000000780	36.9727	8.31936	-2.15191
ENSGALG00000001143	2734.5	261.373	-3.38709
ENSGALG00000001364	9.12372	0.00724903	-10.2976
ENSGALG00000001531	5.54849	1.32975	-2.06094
ENSGALG00000001568	50.8363	12.6225	-2.00987
ENSGALG00000001673	10.8682	2.32686	-2.22365
ENSGALG00000001927	9.89766	2.20997	-2.16306
ENSGALG00000002005	5.18069	1.09329	-2.24447
ENSGALG00000002092	9.15803	2.00368	-2.19239
ENSGALG00000002162	19.2639	0.480797	-5.32432
ENSGALG00000002223	14.1608	3.16773	-2.16038
ENSGALG00000002224	8.29288	0.547654	-3.92054
ENSGALG00000002397	13.8794	1.31433	-3.40055
ENSGALG00000002408	7.16775	0.000331739	-14.3992
ENSGALG00000002552	42.5055	3.0395	-3.80575
ENSGALG00000002763	69.7328	16.5992	-2.07073
ENSGALG00000002763	34.7048	8.51335	-2.02734
ENSGALG00000002844	124.975	31.4133	-1.99219
ENSGALG00000002940	26.7531	6.76601	-1.98333
ENSGALG00000003248	170.089	35.1176	-2.27602
ENSGALG00000003406	147.711	14.532	-3.34548
ENSGALG00000003579	11.0945	2.45486	-2.17613
ENSGALG00000003870	11.5312	1.8153	-2.66726
ENSGALG00000003875	28.1605	6.36435	-2.14559
ENSGALG00000003958	40.4419	9.94613	-2.02365
ENSGALG00000003973	8.27665	1.79971	-2.20129
ENSGALG00000004028	8.00957	1.43701	-2.47865
ENSGALG00000004212	8.36988	1.49904	-2.48117
ENSGALG00000004764	23.3003	3.43148	-2.76345
ENSGALG00000004907	62.6497	11.0211	-2.50704
ENSGALG00000005243	62.6906	11.0902	-2.49896
ENSGALG00000005263	29.6316	3.19394	-3.21373
ENSGALG00000005400	11.1142	2.07183	-2.42343
ENSGALG00000005525	65.7003	6.43511	-3.35186
ENSGALG00000005628	19.7532	3.22825	-2.61327
ENSGALG00000005635	53.0162	10.5667	-2.32691
ENSGALG00000005670	5.25347	1.01693	-2.36905
ENSGALG00000005927	82.9599	17.2057	-2.26953
ENSGALG00000005959	8.34141	1.87268	-2.15519
ENSGALG00000005997	11.62	1.74728	-2.73342
ENSGALG00000006435	10.3156	2.535	-2.02477
ENSGALG00000006512	154.323	38.4711	-2.0041
ENSGALG00000006644	44.4551	9.26969	-2.26176
ENSGALG00000006805	13.0187	2.01291	-2.69323
ENSGALG00000006805	18.1334	4.46942	-2.02049
ENSGALG00000007240	13.0459	2.73253	-2.25528
ENSGALG00000007278	10.531	1.83807	-2.51837
ENSGALG00000007417	14.3888	2.58762	-2.47525
ENSGALG00000007712	182.415	10.6935	-4.09242
ENSGALG00000007781	6.18254	0.532093	-3.53845
ENSGALG00000007874	14.7447	3.1046	-2.24772
ENSGALG00000007945	14.6632	1.96022	-2.90311
ENSGALG00000007986	10.507	2.52237	-2.0585
ENSGALG00000008118	26.92	5.61194	-2.26211
ENSGALG00000008531	7.08384	1.57983	-2.16476
ENSGALG00000008574	85.3587	21.0022	-2.023
ENSGALG00000008615	184.29	34.7852	-2.40544
ENSGALG00000008694	5.20434	1.17465	-2.14748
ENSGALG00000008782	898.892	152.94	-2.55518
ENSGALG00000008911	23.9996	5.88006	-2.02911
ENSGALG00000008978	52.5185	9.8938	-2.40823
ENSGALG00000008978	137.469	33.3719	-2.04239
ENSGALG00000009095	12.6289	0.699715	-4.17382
ENSGALG00000009129	54.0538	7.29158	-2.89009
ENSGALG00000009228	78.1304	15.7339	-2.31201
ENSGALG00000009554	40.6138	8.73261	-2.21749
ENSGALG00000009633	9.46502	1.88632	-2.32703
ENSGALG00000009739	12.3433	1.62995	-2.92083
ENSGALG00000009758	7.68528	1.32328	-2.53798
ENSGALG00000010017	112.857	15.1847	-2.89381
ENSGALG00000010023	168.033	32.9513	-2.35034
ENSGALG00000010147	22.1605	3.44887	-2.6838
ENSGALG00000010342	19.3787	2.06722	-3.22871
ENSGALG00000010542	42.1746	6.5465	-2.68758
ENSGALG00000010647	34.3317	8.28276	-2.05136
ENSGALG00000010705	34.2747	6.07177	-2.49696
ENSGALG00000010775	38.9175	7.76943	-2.32454
ENSGALG00000010924	12.9947	2.8102	-2.20917
ENSGALG00000010976	7.10537	1.06431	-2.739
ENSGALG00000011083	22.6653	5.69882	-1.99175
ENSGALG00000011144	12.7936	1.36458	-3.22889
ENSGALG00000011298	769.785	50.7352	-3.9234
ENSGALG00000011331	133.351	32.8686	-2.02045
ENSGALG00000011521	7.44004	1.60132	-2.21605
ENSGALG00000011559	55.1296	8.9195	-2.62779
ENSGALG00000011663	18.0399	4.5742	-1.9796
ENSGALG00000011712	7.40923	1.78108	-2.05657
ENSGALG00000011746	8.57321	0.641757	-3.73974
ENSGALG00000011773	9.66122	1.91207	-2.33707
ENSGALG00000011951	430.466	74.3439	-2.53361
ENSGALG00000012250	5.82329	1.1982	-2.28097
ENSGALG00000012290	205.553	25.8774	-2.98974
ENSGALG00000012576	71.047	13.6133	-2.38376
ENSGALG00000012623	28.8835	5.76141	-2.32575
ENSGALG00000012671	1944.31	193.871	-3.32609
ENSGALG00000012775	81.885	15.5221	-2.39928
ENSGALG00000012856	5.19719	0.826847	-2.65204
ENSGALG00000012895	73.3977	11.3356	-2.69487
ENSGALG00000012964	19.925	4.69716	-2.08472
ENSGALG00000013157	24.0338	5.41227	-2.15076
ENSGALG00000013205	26.2447	6.21081	-2.07917
ENSGALG00000013229	12.5752	2.49365	-2.33425
ENSGALG00000013625	48.2967	11.3243	-2.0925
ENSGALG00000013707	7.01752	1.26895	-2.46732
ENSGALG00000013726	116.283	25.6263	-2.18194
ENSGALG00000013731	11.2893	2.64097	-2.09581
ENSGALG00000013890	5.28734	1.29403	-2.03067
ENSGALG00000013892	47.3647	10.6841	-2.14835
ENSGALG00000013931	18.9876	3.88912	-2.28754
ENSGALG00000013948	65.5853	10.5221	-2.63995
ENSGALG00000014465	6.37591	0.703479	-3.18005
ENSGALG00000014641	50.8062	10.6552	-2.25345
ENSGALG00000014681	10.6334	0.58214	-4.19109
ENSGALG00000014753	15.7283	3.84618	-2.03186
ENSGALG00000014779	8.88959	2.01004	-2.1449
ENSGALG00000014800	74.1007	17.6871	-2.06679
ENSGALG00000014992	17.1224	2.20955	-2.95407
ENSGALG00000015075	15.7853	2.10428	-2.90718
ENSGALG00000015155	58.5296	10.8309	-2.43401
ENSGALG00000015577	10.5872	1.84762	-2.51857
ENSGALG00000015920	25.989	5.44281	-2.25547
ENSGALG00000015970	42.6877	6.2534	-2.77111
ENSGALG00000015982	8.12132	1.59555	-2.34766
ENSGALG00000016048	6.56391	0.814962	-3.00975
ENSGALG00000016293	14.8567	2.06822	-2.84465
ENSGALG00000016298	11.1877	2.02055	-2.46909
ENSGALG00000016348	5.54641	0.0129025	-8.74776
ENSGALG00000016401	9.67566	2.13244	-2.18186
ENSGALG00000016403	469.53	112.332	-2.06345
ENSGALG00000016410	96.5225	22.5949	-2.09487
ENSGALG00000016511	10.4336	2.60085	-2.00419
ENSGALG00000016616	38.9271	7.5663	-2.36312
ENSGALG00000016680	224.355	19.3302	-3.53686
ENSGALG00000016800	12.02	1.60842	-2.90173
ENSGALG00000016912	30.7528	2.23404	-3.78299
ENSGALG00000016912	37.9588	4.48791	-3.08032
ENSGALG00000017095	30.8181	7.16003	-2.10574
ENSGALG00000017190	7.1162	0.721749	-3.30154
ENSGALG00000017289	7.78214	0.683845	-3.50842
ENSGALG00000017363	5.96969	1.40143	-2.09076
ENSGALG00000017394	79.515	16.2082	-2.29451
ENSGALG00000017604	18.7675	3.63243	-2.36923
ENSGALG00000017644	56.1218	13.7282	-2.03142
ENSGALG00000017814	142.222	18.7374	-2.92416
ENSGALG00000017838	135.364	12.9406	-3.38688
ENSGALG00000019605	15.6151	3.58091	-2.12454
ENSGALG00000019955	44.7832	9.27423	-2.27166
ENSGALG00000020014	13.2161	3.08985	-2.09669
ENSGALG00000021117	16.4991	3.78278	-2.12487
ENSGALG00000022403	543.796	111.372	-2.28768
ENSGALG00000022458	141.038	25.9497	-2.44229
ENSGALG00000022556	7.00506	0.641757	-3.4483
ENSGALG00000022652	25.1632	2.73386	-3.2023
ENSGALG00000022681	11.17	1.42702	-2.96855
ENSGALG00000022724	23.4104	2.48125	-3.23801
ENSGALG00000023090	14.2814	2.73877	-2.38254
ENSGALG00000023163	12.0486	1.88443	-2.67667
ENSGALG00000023209	12.7217	1.30839	-3.28144
ENSGALG00000023211	8.87108	1.91177	-2.2142
ENSGALG00000023214	12.5573	0.683169	-4.20014
ENSGALG00000023216	8.57321	0.641757	-3.73974
ENSGALG00000023224	307.443	66.1854	-2.21573
ENSGALG00000023230	9.60399	1.98005	-2.2781
ENSGALG00000023233	320.065	64.7429	-2.30557
ENSGALG00000023321	33.5418	1.78954	-4.2283
ENSGALG00000023329	25.6118	4.68961	-2.44927
ENSGALG00000023387	15.1235	2.63125	-2.52297
ENSGALG00000023407	10.8653	2.2769	-2.25458
ENSGALG00000023410	25.4358	6.44211	-1.98125
ENSGALG00000023579	40.1878	7.24441	-2.47182
ENSGALG00000023586	24.9842	5.91316	-2.07901
ENSGALG00000023689	5.06125	0.920884	-2.4584
ENSGALG00000023807	43.6873	10.1542	-2.10514
ENSGALG00000023811	7.11327	1.17513	-2.59769
ENSGALG00000023837	28.8705	6.4384	-2.16482
ENSGALG00000023838	39.4002	7.19055	-2.45403
ENSGALG00000023953	9.90618	1.81239	-2.45043
ENSGALG00000023956	8.13276	1.91441	-2.08684
ENSGALG00000024267	10.9571	0.65472	-4.06484
ENSGALG00000024299	1301.32	322.632	-2.01201
ENSGALG00000024376	45.663	8.93308	-2.35379
ENSGALG00000024380	25.1358	5.72912	-2.13336
ENSGALG00000025464	259.599	36.953	-2.81252
ENSGALG00000025584	25.219	1.39487	-4.17631
ENSGALG00000025628	116748	15622.2	-2.90173
ENSGALG00000025638	55867.8	14054.6	-1.99098
ENSGALG00000025651	55841.6	14092.2	-1.98645

## Sheet: Library #2
EnsemblGeneId	value_1	value_2	log2(fold_change)
ENSGALG00000000209	10.0157	2.01641	-2.3124
ENSGALG00000000376	6.74795	1.37743	-2.29247
ENSGALG00000000377	347.255	137.397	-1.33764
ENSGALG00000000379	39.3449	10.7337	-1.87404
ENSGALG00000000456	5.60081	0.5513	-3.34472
ENSGALG00000000576	10.309	4.04895	-1.34828
ENSGALG00000000620	11.3104	1.41603	-2.99772
ENSGALG00000000663	53.855	19.3921	-1.47361
ENSGALG00000000750	7.26892	2.40638	-1.59488
ENSGALG00000000780	21.0579	8.81257	-1.25673
ENSGALG00000001101	5.36306	1.03802	-2.36922
ENSGALG00000001143	30.4348	13.2581	-1.19884
ENSGALG00000001299	13.6932	3.74208	-1.87155
ENSGALG00000001364	11.3227	3.35975	-1.7528
ENSGALG00000001407	5.47909	2.07244	-1.40261
ENSGALG00000001433	6.71865	2.78529	-1.27034
ENSGALG00000001446	11.7881	2.6211	-2.16909
ENSGALG00000002210	8.9996	3.79627	-1.24528
ENSGALG00000002283	9.67938	4.25187	-1.18682
ENSGALG00000002478	11.4606	2.9291	-1.96815
ENSGALG00000002583	8.625	3.11875	-1.46755
ENSGALG00000002661	980.986	360.372	-1.44475
ENSGALG00000002763	15.1992	6.2379	-1.28486
ENSGALG00000002828	6.07362	0.544709	-3.479
ENSGALG00000003032	9.35805	3.35444	-1.48013
ENSGALG00000003141	9.85269	2.75341	-1.8393
ENSGALG00000003169	33.9854	7.68983	-2.14389
ENSGALG00000003193	27.1823	5.57321	-2.28609
ENSGALG00000003320	18.1848	3.39064	-2.4231
ENSGALG00000003406	32.01	4.325	-2.88775
ENSGALG00000003733	19.8786	5.86019	-1.7622
ENSGALG00000003743	14.4803	3.69475	-1.97054
ENSGALG00000003775	34.2315	14.5504	-1.23426
ENSGALG00000003972	12.1343	0.692948	-4.1302
ENSGALG00000004011	67.45	25.6471	-1.39502
ENSGALG00000004329	127.352	11.5742	-3.45983
ENSGALG00000004382	39.1205	13.4041	-1.54525
ENSGALG00000004505	8.82286	3.78294	-1.22174
ENSGALG00000004880	8.40164	2.44864	-1.77869
ENSGALG00000004901	37.8758	14.8788	-1.34802
ENSGALG00000005163	6.9775	3.08596	-1.17699
ENSGALG00000005263	29.6625	6.86506	-2.1113
ENSGALG00000005400	8.39866	3.11335	-1.43169
ENSGALG00000005635	38.6462	8.76339	-2.14077
ENSGALG00000005774	22.5861	9.19946	-1.29582
ENSGALG00000005958	5.81846	1.13128	-2.36268
ENSGALG00000006010	66.7741	21.7707	-1.6169
ENSGALG00000006091	19.139	5.34878	-1.83923
ENSGALG00000006252	273.571	64.6965	-2.08015
ENSGALG00000006345	8.66334	1.46027	-2.56869
ENSGALG00000006401	6.49081	1.66883	-1.95956
ENSGALG00000006405	5.02686	0.924637	-2.4427
ENSGALG00000006473	12.3384	3.21923	-1.93837
ENSGALG00000006485	109.853	34.8385	-1.65681
ENSGALG00000006512	341.511	149.259	-1.19411
ENSGALG00000006639	13.7233	6.04703	-1.18233
ENSGALG00000006726	18.2221	6.92189	-1.39646
ENSGALG00000006958	10.5214	4.06859	-1.37073
ENSGALG00000007047	11.4271	0.894154	-3.6758
ENSGALG00000007113	20.1453	5.5167	-1.86857
ENSGALG00000007253	35.8674	12.1258	-1.56459
ENSGALG00000007268	8.22018	2.60198	-1.65956
ENSGALG00000007417	5.21529	1.78828	-1.54418
ENSGALG00000007622	10.6533	3.44037	-1.63066
ENSGALG00000007732	12.0783	5.20339	-1.21489
ENSGALG00000007943	7.94233	2.67902	-1.56786
ENSGALG00000007945	29.887	1.54433	-4.27446
ENSGALG00000008098	5.24305	1.59397	-1.71778
ENSGALG00000008118	14.7603	4.18172	-1.81956
ENSGALG00000008293	92.8838	33.3321	-1.47851
ENSGALG00000008512	8.12707	0.531624	-3.93426
ENSGALG00000008615	67.9372	27.1799	-1.32166
ENSGALG00000008779	13.174	5.36526	-1.29597
ENSGALG00000008873	26.9697	5.93031	-2.18516
ENSGALG00000008978	146.669	52.4774	-1.48279
ENSGALG00000008978	22.113	8.27648	-1.41781
ENSGALG00000009052	12.4332	4.54715	-1.45117
ENSGALG00000009089	7.15205	2.94049	-1.2823
ENSGALG00000009129	95.1774	14.6303	-2.70166
ENSGALG00000009309	26.632	4.53053	-2.55541
ENSGALG00000009454	7.22119	3.08207	-1.22834
ENSGALG00000009690	5.18411	1.76053	-1.55808
ENSGALG00000009847	16.4769	5.87245	-1.48841
ENSGALG00000010342	10.3362	2.0301	-2.34809
ENSGALG00000010709	23.5616	10.0118	-1.23473
ENSGALG00000011031	41.4087	11.2859	-1.87541
ENSGALG00000011083	12.8497	5.30528	-1.27623
ENSGALG00000011169	7.68814	3.33173	-1.20636
ENSGALG00000011205	39.8761	16.7624	-1.25029
ENSGALG00000011298	380.474	30.2627	-3.65218
ENSGALG00000011298	30.0372	8.03656	-1.9021
ENSGALG00000011663	10.2533	1.32706	-2.94979
ENSGALG00000011773	8.12723	3.59182	-1.17805
ENSGALG00000012173	44.3852	6.41909	-2.78964
ENSGALG00000012290	130.779	23.1434	-2.49846
ENSGALG00000012291	57.5446	20.4416	-1.49318
ENSGALG00000012576	14.8483	2.62713	-2.49874
ENSGALG00000012623	7.55487	1.39728	-2.43479
ENSGALG00000012641	8.54154	3.5954	-1.24835
ENSGALG00000012682	11.5306	4.81199	-1.26076
ENSGALG00000012698	11.9909	5.14042	-1.22198
ENSGALG00000012775	51.2975	13.2928	-1.94825
ENSGALG00000012799	10.0985	1.5264	-2.72593
ENSGALG00000012964	10.478	1.97031	-2.41087
ENSGALG00000012989	5.29912	1.09118	-2.27987
ENSGALG00000013155	12.9359	5.11737	-1.3379
ENSGALG00000013406	14.238	5.63996	-1.33599
ENSGALG00000013464	14.428	4.51973	-1.67456
ENSGALG00000013587	18.7031	5.21391	-1.84284
ENSGALG00000013587	14.8901	6.44614	-1.20785
ENSGALG00000013817	15.3265	4.62795	-1.72758
ENSGALG00000013885	6.52781	0.7297	-3.16122
ENSGALG00000013890	5.69693	0.684608	-3.05684
ENSGALG00000013892	21.1132	7.48812	-1.49547
ENSGALG00000013929	36.5648	13.9981	-1.38522
ENSGALG00000013948	29.4291	5.52906	-2.41214
ENSGALG00000013961	31.248	11.5064	-1.44133
ENSGALG00000013987	7.17938	3.02298	-1.24789
ENSGALG00000014076	11.0161	2.8733	-1.93883
ENSGALG00000014258	11.0806	4.08887	-1.43827
ENSGALG00000014331	475.797	112.153	-2.08487
ENSGALG00000014338	7.99332	3.52674	-1.18046
ENSGALG00000014376	13.5095	4.24118	-1.67144
ENSGALG00000014381	282.807	118.842	-1.25077
ENSGALG00000014636	11.8009	2.84285	-2.05348
ENSGALG00000014645	133.087	42.4202	-1.64955
ENSGALG00000014681	5.24673	1.80172	-1.54205
ENSGALG00000014725	116.316	29.0629	-2.0008
ENSGALG00000014877	69.3039	12.3242	-2.49144
ENSGALG00000014930	43.398	14.4449	-1.58707
ENSGALG00000014933	8.5715	2.77533	-1.62689
ENSGALG00000015022	11.3592	3.214	-1.82142
ENSGALG00000015075	10.5319	2.62248	-2.00576
ENSGALG00000015124	27.9535	11.8352	-1.23994
ENSGALG00000015241	306.935	96.3706	-1.67127
ENSGALG00000015270	5.39832	0.629692	-3.09979
ENSGALG00000015412	7.34224	1.47515	-2.31536
ENSGALG00000015792	9.021	2.78935	-1.69336
ENSGALG00000015970	51.9474	5.83755	-3.15362
ENSGALG00000015970	14.2028	4.2963	-1.72501
ENSGALG00000016298	7.21829	1.42576	-2.33993
ENSGALG00000016594	8.4583	3.06362	-1.46513
ENSGALG00000016616	24.554	5.79728	-2.08251
ENSGALG00000016680	225.859	22.8136	-3.30746
ENSGALG00000016763	6.42412	1.79888	-1.8364
ENSGALG00000016800	16.3337	3.96026	-2.04418
ENSGALG00000016864	5.59335	2.26136	-1.30652
ENSGALG00000016912	14.1696	1.84761	-2.93906
ENSGALG00000016912	5.51757	1.36176	-2.01856
ENSGALG00000017005	13.5436	1.80453	-2.90792
ENSGALG00000017045	5.19205	1.75906	-1.5615
ENSGALG00000017295	22.7381	8.70114	-1.38583
ENSGALG00000017810	261.339	59.6782	-2.13064
ENSGALG00000017860	19.7305	3.26357	-2.59591
ENSGALG00000017933	6.78926	2.9365	-1.20916
ENSGALG00000018851	7.26401	2.84198	-1.35387
ENSGALG00000019017	5.32188	1.3574	-1.97109
ENSGALG00000019215	25.6751	10.0451	-1.35387
ENSGALG00000020342	12.3947	5.06239	-1.29183
ENSGALG00000020693	54.231	13.5792	-1.99772
ENSGALG00000020788	25.2028	5.35933	-2.23346
ENSGALG00000022081	5.44462	2.3485	-1.21309
ENSGALG00000022174	29.1692	10.2208	-1.51294
ENSGALG00000022297	7.77219	1.5204	-2.35387
ENSGALG00000022370	126.637	55.1728	-1.19867
ENSGALG00000022403	132.924	49.2476	-1.43248
ENSGALG00000022641	20.1702	4.377	-2.20421
ENSGALG00000022684	25.7067	0.00503835	-12.3169
ENSGALG00000022734	128.222	40.1358	-1.67568
ENSGALG00000022819	138.016	17.0519	-3.01683
ENSGALG00000022889	12.3291	1.34515	-3.19623
ENSGALG00000023037	6.03614	1.23532	-2.28874
ENSGALG00000023186	123.526	47.6959	-1.37288
ENSGALG00000023207	2633.75	12.5752	-7.71039
ENSGALG00000023209	6.12149	2.50208	-1.29076
ENSGALG00000023232	100.486	0.232851	-8.75337
ENSGALG00000023233	12.2154	0.000333162	-15.1621
ENSGALG00000023234	5.36157	0.653837	-3.03565
ENSGALG00000023278	25.866	11.3499	-1.18837
ENSGALG00000023450	10.3298	1.68608	-2.61507
ENSGALG00000023496	8.08761	3.54876	-1.1884
ENSGALG00000023509	6.99494	0.642385	-3.4448
ENSGALG00000023655	14.0329	6.08267	-1.20603
ENSGALG00000023733	7.67092	2.5722	-1.5764
ENSGALG00000023736	8.56232	1.3995	-2.61309
ENSGALG00000023812	8.60992	3.76579	-1.19305
ENSGALG00000023825	8.02352	1.23864	-2.69548
ENSGALG00000023838	19.6916	6.66928	-1.56198
ENSGALG00000023876	7.02142	0.871969	-3.00941
ENSGALG00000024047	10.1223	4.14886	-1.28675
ENSGALG00000024327	23.3042	8.48606	-1.45742
ENSGALG00000025145	366.549	29.2142	-3.64927
ENSGALG00000025386	259.861	110.531	-1.23329
ENSGALG00000025576	308.4	14.63	-4.3978
ENSGALG00000025637	81.7424	14.5113	-2.4939
ENSGALG00000025639	71.8549	15.0333	-2.25692
ENSGALG00000025668	698.514	280.839	-1.31455
ENSGALG00000025678	77.6805	15.0833	-2.36459
ENSGALG00000025683	360.088	56.3526	-2.6758
